# Supplementary material for: Juvenile Hormone III but Not 20-Hydroxyecdysone Regulates the Embryonic Diapause of Aedes albopictus
Source: Front Physiol. 2019 Oct 25;10:1352. doi: 10.3389/fphys.2019.01352 (PMC6823934; doi:10.3389/fphys.2019.01352)
Supplement: Supplementary file 1 [file Data_Sheet_1.xlsx]

## Sheet: Summary
Supplementary Dataset 1. Transcriptional data for gene set enrichment analysis.
Sheet Name	Description
Gene Set Expression Summary	Gene sets and differential expression data for Figure 2 and Table 1. Gene names are derived from VectorBase, if no name is available then the name of the closest ortholog in FlyBase is given
3 dpov1	Transcriptional differences between diapause and non-diapause eggs at 3 days postoviposition (early in embryonic development)
6 dpov1	Transcriptional differences between diapause and non-diapause eggs at 6 days postoviposition (late in embryonic development)
11 dpov2	Transcriptional differences between diapause and non-diapause eggs at 11 days postoviposition (early in diapause)
1	Data from Poelchau, Monica F., et al. Deep sequencing reveals complex mechanisms of diapause preparation in the invasive mosquito, Aedes albopictus. Proceedings of the Royal Society B: Biological Sciences 280.1759 (2013): 20130143.
2	Data from Poelchau, Monica F., et al. RNA-Seq reveals early distinctions and late convergence of gene expression between diapause and quiescence in the Asian tiger mosquito, Aedes albopictus. Journal of Experimental Biology 216.21 (2013): 4082-4090.
	Note: RNAseq data in these datasets was annotated using the Aedes aegypti genome (AaegL1.3) as described in Poelchau, Monica F., et al. Transcriptome sequencing as a platform to elucidate molecular components of the diapause response in the Asian tiger mosquito, Aedes albopictus. Physiological Entomology 38.2 (2013): 173-181.

## Sheet: Gene Set Expression Summary
Gene Set	Aedes albopictus ID	Aedes aegypti ID	%ID	Name/Description	3d FC	3d p value	6d FC	6d p value	11d FC	11d p pvalue	Note
JH Synthesis	AALF021057	AAEL006634	0.9364	Acetyl-coa acetyltransferase, (Thiol)	-1.23935	2.41e-20	-0.871008	3.97e-14	0.0300143	0.967533	Annotated based on: https://www.ncbi.nlm.nih.gov/pubmed/21554954
JH Synthesis	AALF023323	AAEL005201	0.9741	Hydroxymethylglutaryl-coa synthase (HMGS)	-1.23163	3.13e-19	0.132554	0.480475	-0.152793	0.661719	Annotated based on: https://www.ncbi.nlm.nih.gov/pubmed/21554954
JH Synthesis	AALF008540	AAEL009311	0.8525	3-hydroxy-3-methylglutaryl-coenzyme A reductase (HMGR)	-1.30441	6.78e-21	-0.337969	0.0178107	0.0393016	0.951039	Annotated based on: https://www.ncbi.nlm.nih.gov/pubmed/21554954
JH Synthesis	AALF028400	AAEL006435	0.8133	Mevalonate kinase (MevK)	-0.0529221	0.818543	-0.285183	0.0352101	-0.199721	0.608826	Annotated based on: https://www.ncbi.nlm.nih.gov/pubmed/21554954
JH Synthesis	AALF024095	AAEL013814	0.9198	Phosphomevalonate kinase (P-MevL)	-0.254255	0.505039	-0.244531	0.590159	-0.394302	0.599229	Annotated based on: https://www.ncbi.nlm.nih.gov/pubmed/21554954
JH Synthesis	AALF005923	AAEL004050	0.913	Diphosphomevalonate decarboxylase (PP-MevD)	-0.248778	0.206829	0.925679	7.48e-05	0.241179	0.864325	Annotated based on: https://www.ncbi.nlm.nih.gov/pubmed/21554954
JH Synthesis	AALF013660	AAEL006144	0.9754	Isopentenyl-diphosphate delta isomerase (IPPI)	-0.160408	0.539738	-1.09438	2.02e-13	0.101954	0.843223	Annotated based on: https://www.ncbi.nlm.nih.gov/pubmed/21554954
JH Synthesis	AALF022122	AAEL003497	0.9916	Farnesyl-pyrophosphate synthetase (FPPS)	0.169771	0.334566	-0.309063	0.0243488	0.341886	0.112249	Annotated based on: https://www.ncbi.nlm.nih.gov/pubmed/21554954
JH Synthesis	AALF004826	AAEL010099	0.8908	4-nitrophenylphosphatase (FPPP)	#N/A	#N/A	#N/A	#N/A	-0.331044	0.755309	Annotated based on: https://www.ncbi.nlm.nih.gov/pubmed/21554954
JH Synthesis	AALF028416	AAEL017302	0.8327	Farnesol dehydrogenase (FOLD)	#N/A	#N/A	#N/A	#N/A	#N/A	#N/A	Annotated based on: https://www.ncbi.nlm.nih.gov/pubmed/21554954
JH Synthesis	AALF023169	AAEL012161	0.9279	Aldehyde dehydrogenase (FALD)	-0.477171	0.00119648	-0.0312035	0.892041	0.0742397	0.926866	Annotated based on: https://www.ncbi.nlm.nih.gov/pubmed/21554954
JH Synthesis	AALF017726	AAEL006280	0.917	Juvenile hormone acid methyltransferase (JHAMT)	-4.3604	0	-0.540362	0.166317	-0.506221	0.206818	Annotated based on: https://www.ncbi.nlm.nih.gov/pubmed/21554954
JH Synthesis	AALF006193	AAEL002067	0.8891	Methyl farnesoate epoxidase (EPOX)	-5.91326	0	0.572401	0.319751	-1.338	0.0324453	Annotated based on: https://www.ncbi.nlm.nih.gov/pubmed/26738925
JH Inducible	AALF001259	AAEL004242	0.8337	juvenile hormone-inducible protein, putative	0.0786457	0.975513	-4.46576	3.59e-55	-0.66402	0.0151433
JH Inducible	AALF002635	AAEL014438	0.7446	juvenile hormone-inducible protein, putative	2.33165	0.0100317	-4.45998	6.91e-100	0.38142	0.143292
JH Inducible	AALF002638	AAEL014440	0.7024	juvenile hormone-inducible protein, putative	0.56085	0.00693046	-0.48329	0.00743785	0.43245	0.271848
JH Inducible	AALF002639	AAEL014439	0.8655	juvenile hormone-inducible protein, putative	0.656605	0.373725	0.0879882	0.81067	0.761599	0.00664578
JH Inducible	AALF002642	AAEL014435	0.9296	juvenile hormone-inducible protein, putative	-0.0680803	0.889546	-2.7957	3.15e-63	0.0656371	0.92099
JH Inducible	AALF005731	AAEL006605	0.8427	juvenile hormone-inducible protein, putative	-0.126104	0.961564	-2.16185	5.21e-07	-0.463637	0.0431098
JH Inducible	AALF006579	AAEL012687	0.9191	juvenile hormone-inducible protein, putative	0.45305	0.505581	-0.677911	0.0512523	-0.304068	0.542773
JH Inducible	AALF006580	AAEL012680	0.9249	juvenile hormone-inducible protein, putative	-0.675031	0.0268124	-2.57514	8.38e-47	-0.333411	0.170133
JH Inducible	AALF007626	AAEL002133	0.9059	juvenile hormone-inducible protein, putative	-0.156266	0.822534	-0.928867	8.77e-11	0.0844576	0.897991
JH Inducible	AALF009677	AAEL002904	0.8545	juvenile hormone-inducible protein, putative	-0.135804	0.702048	-3.04414	7.01e-54	0.164616	0.897767
JH Inducible	AALF015372	AAEL006581	0.9467	juvenile hormone-inducible protein, putative	0.356739	0.673869	1.40546	0.00209808	-0.487044	0.469179
JH Inducible	AALF015523	AAEL004023	0.9549	juvenile hormone-inducible protein, putative	-1.11606	8.33e-12	-1.59756	1.39e-31	-0.882192	0.0185323
JH Inducible	AALF020993	AAEL001899	0.8721	juvenile hormone-inducible protein, putative	-0.847358	0.569496	-1.35629	4.37e-05	-0.303737	0.604313
JH Inducible	AALF022387	AAEL000516	0.9095	juvenile hormone-inducible protein, putative	0.529052	0.10464	-3.75434	2.15e-57	-0.151132	0.710482
JH Inducible	AALF026785	AAEL001833	0.958	juvenile hormone-inducible protein, putative	-1.4473	2.43e-06	-0.933017	0.000102987	0.457189	0.278391
JH Receptor	AALF010370	AAEL001746	0.6521	Methoprene-tolerant protein (NCBI)	-0.479248	0.000106552	-0.521489	5.18e-05	0.0217312	0.979145	Annotated based on: https://www.ncbi.nlm.nih.gov/pmc/articles/PMC3021087/
JH Receptor	AALF005836	AAEL002382	0.867	FISC	-0.249568	0.158918	0.331962	0.0409551	-0.123557	0.888992	Annotated based on: https://www.ncbi.nlm.nih.gov/pmc/articles/PMC3021087/
JH Degradation	AALF019363	AAEL005200	0.8926	Carboxylic ester hydrolase	0.81679	0.769021	0.384029	0.589249	-1.75797	5.37e-05	Annotated based on: https://www.ncbi.nlm.nih.gov/pmc/articles/PMC2020842/
20HE Synthesis	AALF021619	AAEL011203	0.9425	Neverland	-1.06	0.0618544	-2.12532	6.64e-10	0.103156	0.926866
20HE Synthesis	AALF025410	AAEL013973	0.8802	Shroud	0.381593	0.216923	-0.0182887	0.972839	0.125296	0.885898
20HE Synthesis	AALF022414	AAEL004941	0.7188	Cytochrome P450 (Cyp6t3)	0.242092	0.289558	-1.2563	2.63e-12	0.548303	0.0169616
20HE Synthesis	AALF007996	AAEL009762	0.9776	Cytochrome P450 (Spook)	-2.4816	8.93e-26	2.16669	8.02e-11	#N/A	#N/A
20HE Synthesis	AALF020461	AAEL011463	0.9563	Cytochrome P450 (Disembodied)	0.401932	0.124176	-0.947611	0.000310591	0.544268	0.294198
20HE Synthesis	AALF024069	AAEL011850	0.9765	Cytochrome P450 (Shadow)	0.0390685	0.905883	-0.170088	0.360959	-0.159655	0.868986
20HE Synthesis	AALF000520	AAEL010946	0.948	Cytochrome P450 (Shade)	-0.545568	9.97e-05	-1.20095	1.69e-20	0.155009	0.742828
20HE Synthesis	AALF09750	AAEL006733	0.8946	FAD NADPH dehydrogenase (dare)	0.155596	0.541839	-0.150645	0.502893	0.0726414	0.897767
20HE Inducible	AALF011214	AAEL009932	91.0385	lethal (2) giant larvae	-0.177026	0.537646	0.135138	0.841165	0.0699232	0.924017
20HE Inducible	AALF011390	AAEL000670	97.8723	Ecdysone-induced protein 28/29kD	0.0935956	0.634088	0.908093	0.0379855	-0.238615	0.904133
20HE Inducible	AALF011391	AAEL000660	92.2374	Ecdysone-induced protein 28/29kD	0.0576065	0.931469	-3.85585	5.22e-86	-0.0705969	0.972693
20HE Inducible	AALF010930	AAEL008244	60.7492	kohtalo	-0.0963166	0.574766	0.416287	0.00282366	0.0432378	0.959058
20HE Inducible	AALF020422	AAEL004059	93.5484	Ecdysone-induced protein 55E	0.865962	6.03e-14	-2.1994	6.46e-90	-0.612391	0.000604812
20HE Inducible	AALF010304	AAEL012513	37.9928	Ecdysone-induced protein 63F 1	-0.993115	0.012907	-0.0219999	1.01e-95	0.354402	0.22874
20HE Inducible	AALF013866	AAEL013770	94.6962	Blimp-1	0.0419936	0.861934	-0.0190072	5.24e-16	-0.542342	0.107831
20HE Inducible	AALF025102	AAEL002130	96.6543	Ecdysone-inducible gene L2	0.293697	0.0279096	-0.0641651	0.727886	-0.626526	0.173589
20HE Inducible	AALF021891	AAEL003163	96.092	fork head	0.226239	0.254106	0.330226	0.317171	-0.327616	0.609228
20HE Inducible	AALF024251	AAEL003771	97.1645	absent, small, or homeotic discs 2	-1.10825	0.0145836	-0.568605	0.312089	0.212615	0.659568
20HE Inducible	AALF006574	AAEL005730	98.1982	alien	0.113574	0.455969	-0.427028	0.000169249	0.166832	0.636966
20HE Inducible	AALF013291	AAEL011387	83.1579	halfway	-3.10528	2.67e-12	1.06825	0.225921	#N/A	#N/A
20HE Inducible	AALF019763	AAEL004746	98.1132	Ecdysone-dependent gene 84A	-1.75224	0.0561916	-0.225668	0.742994	0.129031	0.914192
20HE Inducible	AALF018158	AAEL001735	97.8417	Ecdysone-dependent gene 78E	-2.64044	0	1.5392	1.65e-15	#N/A	#N/A
20HE Inducible	AALF025585	AAEL000845	74.2785	Protein tyrosine phosphatase 52F	0.328076	0.633269	0.0344579	1.56e-05	0.258424	0.438613
20HE Inducible	AALF002866	AAEL008426	78.0844	broad	-2.17024	0	0.134753	0.618332	-0.295991	0.752438
20HE Inducible	AALF005838	AAEL002390	73.8063	Kruppel homolog 1	0.0978311	0.953212	0.926304	6.48e-06	0.60337	0.437232
20HE Inducible	AALF012083	AAEL006013	82.649	SET domain containing 2	0.0428344	0.856184	-0.273499	8.18e-05	-0.150781	0.710852
20HE Inducible	AALF008598	AAEL018319	81.1195	rigor mortis	-0.21196	0.177146	0.656375	1.58e-05	-0.314874	0.384396
20HE Inducible	AALF008930	AAEL011240	81.7282	putzig	-0.438973	0.544075	0.108318	0.187327	0.466801	0.300966
20HE Inducible	AALF013156	AAEL004472	96.3568	belle	-0.232393	0.173464	-0.0398603	0.607959	-0.0574509	0.968816
20HE Inducible	AALF001992	AAEL003193	76.9029	Nucleosome remodeling factor - 38kD	-0.0513744	0.8977	-0.0806362	1.79e-21	-0.321895	0.256822
20HE Inducible	AALF027348	AAEL003968	97.7605	Imitation SWI	0.150489	0.926286	0.807612	0.000262941	#N/A	#N/A
20HE Inducible	AALF008656	AAEL006038	76.688	BRWD3	0.0767691	0.896517	0.14563	0.66258	-0.0205783	0.977557
20HE Inducible	AALF001558	AAEL006736	87.7593	swi2	0.466704	0.0953423	0.22534	3.76e-24	0.299492	0.528967
20HE Inducible	AALF005820	AAEL000970	75.3593	Trithorax-like	-0.534269	0.000274375	0.755474	8.62e-05	-0.23582	0.522355
20HE Inducible	AALF010440	AAEL007586	90.4334	Nucleoporin 98-96kD	-0.0131896	0.990186	-0.874736	2.56e-08	0.228259	0.857439

## Sheet: 3 dpov
Gene	Log2FC in Diapause	FDR corrected p-value
AAEL000001	0.149159	0.535586
AAEL000003	0.0990387	0.68211
AAEL000004	0.211041	0.140207
AAEL000005	0.022708	0.980403
AAEL000006	0.526556	0.000230447
AAEL000008	0.0653252	0.793308
AAEL000013	0.478771	0.000594468
AAEL000015	0.10036	0.598235
AAEL000016	0.506618	0.00011047
AAEL000020	0.194749	0.64807
AAEL000021	-1.24233	0.000925493
AAEL000022	0.428567	0.0348567
AAEL000024	0.996031	0.371443
AAEL000026	-0.139548	0.565885
AAEL000028	-0.641346	0.02057
AAEL000029	-2.38262	1.7e-13
AAEL000032	0.228596	0.0584902
AAEL000033	0.307498	0.150481
AAEL000038	-0.454691	0.0532285
AAEL000040	0.0394049	0.963385
AAEL000041	0.464174	0.600116
AAEL000042	0.213458	0.600234
AAEL000046	0.338793	0.817744
AAEL000049	0.211653	0.481547
AAEL000050	-0.204287	0.428649
AAEL000053	0.455925	0.330844
AAEL000054	0.138468	0.517328
AAEL000055	0.277957	0.085918
AAEL000057	0.379347	0.672676
AAEL000060	0.650215	0.279387
AAEL000062	-0.261719	0.505039
AAEL000064	-1.24532	2.41e-20
AAEL000065	0.44135	0.0185323
AAEL000070	-0.151287	0.426382
AAEL000073	0.559486	0.453956
AAEL000074	-1.10113	3.17e-08
AAEL000077	-0.0441792	0.851157
AAEL000078	-0.0313429	0.970213
AAEL000079	0.188773	0.450351
AAEL000080	0.720997	2.35e-07
AAEL000081	0.441572	1.54e-05
AAEL000083	0.648176	0.0997719
AAEL000084	0.172795	0.23995
AAEL000085	1.0266	0.337571
AAEL000088	-0.0691631	0.839751
AAEL000089	-1.12653	0.0298875
AAEL000090	0.11122	0.494203
AAEL000091	0.504467	0.000136748
AAEL000092	-2.14538	0.00301752
AAEL000093	0.0594102	0.812312
AAEL000094	0.541116	0.186678
AAEL000097	0.134553	0.886699
AAEL000098	0.347977	0.090497
AAEL000099	-0.9296	5.7e-12
AAEL000101	-0.0688418	0.890576
AAEL000102	0.0617675	0.871551
AAEL000104	0.337106	0.0459078
AAEL000105	-0.576111	0.577971
AAEL000106	0.119917	0.737727
AAEL000107	-0.162712	0.624226
AAEL000109	0.343257	0.000898561
AAEL000111	0.399129	0.0955127
AAEL000116	0.188627	0.386442
AAEL000118	0.364628	0.0211395
AAEL000119	-0.0360244	0.946929
AAEL000121	-1.52396	6.04e-06
AAEL000122	-0.0598072	0.935148
AAEL000123	-1.26868	0.0316479
AAEL000126	-0.0598872	0.766894
AAEL000128	0.624486	3.87e-08
AAEL000131	-0.666059	0.60038
AAEL000132	-2.58075	0.0189793
AAEL000134	-1.01643	1.93e-06
AAEL000135	-0.691707	0.167097
AAEL000136	0.993201	0.61616
AAEL000137	0.266954	0.290561
AAEL000138	0.387332	0.278117
AAEL000140	0.505746	0.0666083
AAEL000141	1.29117	0.00284946
AAEL000142	0.34337	0.162244
AAEL000143	0.207903	0.562841
AAEL000147	0.247323	0.393317
AAEL000149	0.0591559	0.851181
AAEL000151	-4.06712	1.6e-05
AAEL000152	0.250874	0.258872
AAEL000153	-1.23307	1.32e-06
AAEL000154	0.980902	7.39e-07
AAEL000157	0.354269	0.216562
AAEL000158	-0.106812	0.853358
AAEL000159	0.0335847	0.906609
AAEL000161	-1.67454	1.31e-11
AAEL000163	-0.126038	0.711943
AAEL000164	0.351834	0.3403
AAEL000165	-0.101348	0.770883
AAEL000166	-0.215535	0.796874
AAEL000170	0.291644	0.121452
AAEL000171	0.379289	0.630896
AAEL000172	0.301468	0.00847092
AAEL000173	-0.199656	0.641534
AAEL000174	-0.10638	0.92078
AAEL000175	0.292957	0.0109898
AAEL000176	-2.1252	0
AAEL000178	-0.00203698	1
AAEL000179	-0.233543	0.117875
AAEL000180	0.401177	0.262345
AAEL000181	0.311801	0.00439873
AAEL000184	0.182978	0.629721
AAEL000185	-0.219118	0.0976497
AAEL000186	0.118151	0.931863
AAEL000187	0.0285594	0.931099
AAEL000188	-2.4445	1.5e-21
AAEL000191	0.272065	0.045704
AAEL000192	-0.0934808	0.7129
AAEL000193	0.328699	0.00838622
AAEL000194	-0.0261045	0.919257
AAEL000195	-0.44982	0.336927
AAEL000196	1.0056	0.515439
AAEL000197	0.178413	0.27268
AAEL000199	0.314874	0.0194901
AAEL000200	1.27015	1.32e-06
AAEL000201	0.767925	5.53e-05
AAEL000202	-0.354959	0.732252
AAEL000204	-0.552748	0.000486944
AAEL000208	-0.0774823	0.683723
AAEL000209	-1.51142	0.178221
AAEL000210	0.0589552	0.819985
AAEL000211	0.0915953	0.892163
AAEL000212	-0.154575	0.30071
AAEL000213	-0.0644993	0.936411
AAEL000214	-0.0250387	0.976714
AAEL000215	-0.126824	0.847914
AAEL000217	0.0216561	0.941424
AAEL000219	0.171808	0.448262
AAEL000220	-0.263046	0.796385
AAEL000221	-0.122631	0.647459
AAEL000222	0.0134621	0.989464
AAEL000227	-0.120899	0.589391
AAEL000228	-0.269867	0.113486
AAEL000230	0.114079	0.776366
AAEL000231	0.108291	0.514397
AAEL000233	-0.0802332	0.840816
AAEL000234	0.102871	0.781669
AAEL000235	-0.221554	0.118366
AAEL000236	-0.408319	0.0700492
AAEL000238	-0.453826	0.199
AAEL000239	-2.03495	0
AAEL000240	-0.335155	0.246874
AAEL000241	0.425732	0.00287345
AAEL000242	0.0591377	0.972812
AAEL000243	-0.579961	0.00295359
AAEL000244	0.506219	0.0192631
AAEL000245	-0.740174	2.57e-05
AAEL000246	0.137584	0.366562
AAEL000248	-0.153202	0.302359
AAEL000250	-1.11229	0.00251782
AAEL000251	-2.11452	1.5e-20
AAEL000254	-0.723962	0.000218577
AAEL000255	0.036327	0.970269
AAEL000256	0.0941259	0.680169
AAEL000257	0.257728	0.0278733
AAEL000258	-0.226565	0.236872
AAEL000260	-0.271542	0.19721
AAEL000261	0.212525	0.599639
AAEL000262	0.0763003	0.908714
AAEL000263	0.291284	0.0609782
AAEL000264	0.25499	0.220302
AAEL000265	-0.133804	0.755393
AAEL000266	-1.8413	0.306748
AAEL000267	1.07726	0.00483587
AAEL000268	1.86056	2.57e-05
AAEL000269	0.266718	0.0344893
AAEL000270	0.170841	0.222918
AAEL000271	0.390655	0.3403
AAEL000272	-0.138026	0.794043
AAEL000273	-0.324298	0.0037791
AAEL000276	0.147651	0.272537
AAEL000277	-2.46808	0
AAEL000278	-0.180493	0.433868
AAEL000279	0.105774	0.751911
AAEL000281	0.265893	0.052597
AAEL000284	0.13394	0.793262
AAEL000285	-3.326	1.78e-17
AAEL000287	0.194518	0.730935
AAEL000288	-0.932592	8.48e-20
AAEL000289	0.101493	0.772906
AAEL000291	0.0795003	0.685752
AAEL000292	0.344039	0.0844297
AAEL000293	-0.021238	0.937408
AAEL000294	-0.355048	0.386178
AAEL000295	0.113395	0.637314
AAEL000296	0.343921	0.00557255
AAEL000297	-0.0247408	0.975913
AAEL000299	0.261945	0.659718
AAEL000300	0.0607942	0.950028
AAEL000301	0.326674	0.00403709
AAEL000304	-0.442995	0.00051464
AAEL000305	0.303273	0.323482
AAEL000307	-2.09201	0.206162
AAEL000309	-0.095086	0.89427
AAEL000311	-0.836741	0.106294
AAEL000312	-4.29749	2.4e-12
AAEL000313	0.828765	0.398389
AAEL000314	0.370507	0.162915
AAEL000315	-0.590654	0.000334076
AAEL000316	0.85218	0.0176393
AAEL000322	0.0855146	0.773648
AAEL000323	0	1
AAEL000324	0.235143	0.120153
AAEL000395	-0.24992	0.780685
AAEL000404	0.367045	0.0683726
AAEL000405	-0.0405583	0.962621
AAEL000406	-0.787699	0.468739
AAEL000407	-0.188962	0.512452
AAEL000408	0.0940639	0.881817
AAEL000410	-0.114063	0.468259
AAEL000411	0.841965	0.00859566
AAEL000412	-0.271187	0.375985
AAEL000414	-0.0395197	0.920502
AAEL000415	0.475602	0.00014842
AAEL000416	1.278	4.46e-17
AAEL000417	-0.560744	0.000116043
AAEL000418	0.0199535	0.977488
AAEL000419	-0.0502282	0.884313
AAEL000420	-0.382935	0.288537
AAEL000421	-0.0608057	0.898883
AAEL000422	-0.054877	0.848484
AAEL000423	-0.211954	0.76898
AAEL000424	0.11178	0.501452
AAEL000425	0.840427	3.07e-05
AAEL000427	0.207371	0.104205
AAEL000428	-1.01056	4.86e-06
AAEL000429	0.287201	0.301626
AAEL000430	0.326103	0.00668105
AAEL000431	0.245335	0.213576
AAEL000432	-0.264841	0.797397
AAEL000433	-0.0867282	0.651068
AAEL000434	-0.134587	0.627557
AAEL000435	0.545462	0.000221035
AAEL000436	0.219966	0.140489
AAEL000437	-0.608654	0.292788
AAEL000438	-0.174847	0.263247
AAEL000439	-0.383569	0.395693
AAEL000440	-0.0229668	0.940177
AAEL000441	0.312284	0.820718
AAEL000442	0.235703	0.356753
AAEL000444	0.0480229	0.813834
AAEL000445	0.791726	0.00973693
AAEL000446	0.279198	0.0146479
AAEL000448	-0.262041	0.0755837
AAEL000450	0.302486	0.0251882
AAEL000451	0.6023	3.08e-06
AAEL000452	0.273922	0.0668641
AAEL000454	-0.0364354	0.88709
AAEL000455	-1.67887	0.000587381
AAEL000456	-0.290065	0.539483
AAEL000457	0.323508	0.877798
AAEL000458	-0.040193	0.909315
AAEL000459	0.255541	0.102997
AAEL000460	0.0585578	0.847099
AAEL000461	-0.901759	4.13e-11
AAEL000463	-0.280087	0.688774
AAEL000464	0.33074	0.0207602
AAEL000465	0.491644	0.212756
AAEL000466	-1.37161	0.0315422
AAEL000467	-0.0737679	0.883358
AAEL000468	0.0855396	0.897031
AAEL000469	0.100806	0.582019
AAEL000471	-0.332563	0.0216646
AAEL000472	-0.050943	0.883815
AAEL000474	-1.63549	0.00569286
AAEL000475	0.117046	0.623066
AAEL000476	1.14897	0.000700479
AAEL000477	0.178396	0.323973
AAEL000478	0.286219	0.229632
AAEL000479	-3.60282	2.73e-10
AAEL000481	-2.31153	0.00023774
AAEL000483	-0.0749558	0.675458
AAEL000484	-2.48332	9.18e-12
AAEL000485	-0.177104	0.25391
AAEL000486	0.126628	0.391354
AAEL000487	-0.0837171	0.807998
AAEL000488	0.279631	0.0713744
AAEL000489	-0.0413758	0.950012
AAEL000493	-0.44568	0.113696
AAEL000495	-2.39034	1.16e-17
AAEL000498	-0.59656	0.430009
AAEL000500	1.7246	0.481968
AAEL000502	0.10992	0.772906
AAEL000503	-0.53525	0.425877
AAEL000504	0.118587	0.85947
AAEL000505	0.58191	0.0345454
AAEL000508	-0.314109	0.291161
AAEL000509	1.30622	1.43e-15
AAEL000510	0.14157	0.448718
AAEL000511	-0.00281127	1
AAEL000512	0.0200927	0.993288
AAEL000516	0.529052	0.10464
AAEL000519	0.212973	0.887759
AAEL000520	1.28081	0.256432
AAEL000522	0.422833	0.00909734
AAEL000523	-0.205332	0.0983909
AAEL000524	-3.26992	1.17e-11
AAEL000527	0.442694	0.0221747
AAEL000528	0.476433	0.603934
AAEL000531	-0.241796	0.161713
AAEL000532	-0.369161	0.684186
AAEL000536	-1.00462	1.53e-23
AAEL000539	-0.203669	0.571886
AAEL000540	-0.318007	0.0160892
AAEL000541	-0.514442	7.14e-05
AAEL000546	0.604707	0.221687
AAEL000549	0.123805	0.529932
AAEL000550	0.518359	0.0173286
AAEL000551	0.177333	0.612467
AAEL000553	-0.362575	0.0919207
AAEL000554	-1.84536	0.293123
AAEL000557	-0.0852449	0.776596
AAEL000558	-0.175453	0.522141
AAEL000559	-0.000852041	1
AAEL000561	0.351716	0.259195
AAEL000562	0.142117	0.50704
AAEL000564	0.0597685	0.785778
AAEL000565	0.031836	0.934941
AAEL000566	0.141043	0.9352
AAEL000567	0.296623	0.0766203
AAEL000569	-0.312086	0.121008
AAEL000570	-0.67677	0.656175
AAEL000571	-1.48963	0.000786232
AAEL000572	0.11419	0.611705
AAEL000573	0.531324	0.0573445
AAEL000574	0.676561	3.57e-11
AAEL000576	-0.876147	0.0263865
AAEL000577	0.163755	0.281514
AAEL000578	0.310996	0.769822
AAEL000580	0.0763738	0.96364
AAEL000581	0.785914	6.76e-13
AAEL000583	0.218706	0.421
AAEL000584	0.121106	0.856803
AAEL000585	-1.18715	0.600821
AAEL000586	-6.15225	2e-07
AAEL000587	0.368011	0.634085
AAEL000588	-0.100802	0.74733
AAEL000589	-0.48156	5.63e-06
AAEL000590	-0.477489	0.0011204
AAEL000591	0.141897	0.613621
AAEL000592	-0.230382	0.812312
AAEL000593	-0.157105	0.746978
AAEL000594	-0.28281	0.804615
AAEL000595	-0.0121077	0.999408
AAEL000596	0.559676	0.318466
AAEL000597	-0.750773	1.91e-05
AAEL000600	0.0281218	0.951971
AAEL000602	0.162854	0.542378
AAEL000604	0.305249	0.161465
AAEL000605	0.197907	0.504513
AAEL000607	1.31599	0.557446
AAEL000608	0.0334176	0.875066
AAEL000609	-1.35736	0.118525
AAEL000612	-0.169542	0.886699
AAEL000617	0.091282	0.922277
AAEL000618	-0.684403	0.206067
AAEL000620	-0.00888025	0.997721
AAEL000622	0.171602	0.236369
AAEL000623	0.521872	0.613981
AAEL000624	0.0356868	0.895524
AAEL000626	0	1
AAEL000629	-0.0296897	0.958902
AAEL000630	-0.00113415	1
AAEL000631	0.837804	2.87e-08
AAEL000634	-0.209314	0.131735
AAEL000635	0.230208	0.0997492
AAEL000636	0.447898	0.317945
AAEL000638	-0.235958	0.834002
AAEL000639	-2.49583	0.00301914
AAEL000640	-1.17158	1.19e-12
AAEL000641	-0.571178	9.15e-08
AAEL000642	1.15226	2.52e-09
AAEL000643	0.0559354	0.80948
AAEL000644	-1.30532	0.110185
AAEL000645	0.498519	0.17365
AAEL000649	-0.487852	0.000886015
AAEL000650	-0.681983	1.46e-07
AAEL000654	-0.390014	0.00341259
AAEL000655	-0.135472	0.451123
AAEL000656	0.171567	0.772138
AAEL000657	-0.163827	0.363255
AAEL000659	0.361513	0.265175
AAEL000660	0.0576065	0.931469
AAEL000661	0.220843	0.145546
AAEL000662	-0.666366	0.0828304
AAEL000663	-0.0144973	0.987284
AAEL000665	-2.4203	0.287708
AAEL000666	-0.294469	0.615783
AAEL000669	-3.05863	0.000277579
AAEL000670	0.0935956	0.634088
AAEL000670	-0.898855	3.4e-16
AAEL000671	0.126433	0.751696
AAEL000672	0.938709	1.59e-11
AAEL000673	0.0260893	0.941106
AAEL000674	0.214799	0.154344
AAEL000676	0.302149	0.749255
AAEL000677	0.305039	0.0715813
AAEL000679	0.196752	0.23995
AAEL000682	-0.102538	0.512191
AAEL000683	-1.78654	9.81e-21
AAEL000685	-0.405504	0.0173083
AAEL000687	0.431976	0.717311
AAEL000691	-0.0619866	0.960665
AAEL000692	1.25931	1.9e-10
AAEL000693	0.131223	0.391468
AAEL000695	-0.609793	0.00345137
AAEL000696	0.0121428	0.999052
AAEL000697	0.466213	0.14733
AAEL000698	-0.252097	0.650986
AAEL000699	0.338499	0.421458
AAEL000700	0.132892	0.435144
AAEL000701	-0.126276	0.646618
AAEL000702	-2.29007	5.76e-08
AAEL000703	-1.07183	1.14e-19
AAEL000704	-2.27266	2.38e-07
AAEL000706	0.247559	0.0550607
AAEL000707	0.338387	0.0278372
AAEL000708	0.0779434	0.833529
AAEL000709	-0.0657217	0.812342
AAEL000711	-1.40505	2.24e-10
AAEL000712	-0.0673415	0.903553
AAEL000713	-0.0535551	0.793541
AAEL000714	0.233409	0.777502
AAEL000715	-0.00296072	1
AAEL000716	-0.192435	0.606592
AAEL000717	0.0309185	0.913817
AAEL000718	-0.922952	4.65e-09
AAEL000719	0.0123674	0.974675
AAEL000720	-1.94624	0
AAEL000721	-1.10839	0.0274801
AAEL000722	0.160507	0.760279
AAEL000723	-3.66591	0
AAEL000724	0.0141287	0.975802
AAEL000727	0.299262	0.65143
AAEL000728	-0.525333	7.95e-05
AAEL000729	0.119009	0.82572
AAEL000730	0.176494	0.181282
AAEL000731	0.00572198	1
AAEL000733	0.125927	0.731479
AAEL000734	-0.693042	0.0122565
AAEL000736	-1.828	8.32e-05
AAEL000737	-0.183321	0.219636
AAEL000738	-0.043636	0.863558
AAEL000739	0.163357	0.631372
AAEL000741	1.74617	3.84e-20
AAEL000742	-2.10848	5.13e-08
AAEL000743	-0.736368	6.6e-14
AAEL000744	-3.17786	0
AAEL000745	0.608392	0.100424
AAEL000746	-0.425593	0.000180904
AAEL000747	-0.0424649	0.851976
AAEL000750	0.167336	0.238142
AAEL000752	-0.0482075	0.836149
AAEL000753	-0.120123	0.560926
AAEL000755	-0.0205771	0.999926
AAEL000758	0.399934	9.51e-05
AAEL000759	-0.354829	0.0516754
AAEL000761	0.33828	0.576555
AAEL000763	0.192284	0.242739
AAEL000765	0.0418119	0.973822
AAEL000766	-0.0720792	0.789368
AAEL000767	-0.179142	0.194106
AAEL000770	-0.183236	0.225882
AAEL000771	-0.700225	0.0868004
AAEL000772	-0.101121	0.868917
AAEL000773	-1.13443	0.0185663
AAEL000774	-0.696403	0.812312
AAEL000776	-0.0153713	0.990329
AAEL000778	1.01855	0.395246
AAEL000780	-1.78592	2.29e-23
AAEL000782	0.507508	0.00245384
AAEL000784	0.208172	0.685574
AAEL000785	0.22962	0.518591
AAEL000787	0.234621	0.256044
AAEL000788	-0.693551	5.1e-08
AAEL000791	-0.0894079	0.689168
AAEL000792	0.123276	0.914455
AAEL000794	-0.32899	0.0105938
AAEL000798	0.130163	0.381202
AAEL000801	0.818199	0.769779
AAEL000802	-0.0823501	0.715884
AAEL000803	-0.147799	0.895899
AAEL000804	0.128404	0.479995
AAEL000805	0.0641634	0.91162
AAEL000806	1.21088	1.52e-05
AAEL000807	-0.309753	0.0572553
AAEL000809	-1.1876	0.264465
AAEL000810	-0.774311	0.00144694
AAEL000811	0.883258	6.7e-05
AAEL000812	-0.85577	0.000397576
AAEL000815	0.0759255	0.727186
AAEL000816	0.322003	0.295414
AAEL000817	-2.30646	3.35e-06
AAEL000818	-1.8038	2.15e-26
AAEL000819	-0.291878	0.21284
AAEL000822	-0.226262	0.113926
AAEL000823	0.107857	0.558196
AAEL000824	0.122894	0.420999
AAEL000825	-0.0694828	0.739454
AAEL000826	1.18406	0.0205208
AAEL000828	0.752225	0.0299141
AAEL000832	0.29265	0.0140511
AAEL000834	-0.0457293	0.94475
AAEL000836	0.363489	0.209141
AAEL000838	-0.107276	0.589433
AAEL000839	0.101807	0.820011
AAEL000840	-0.0441199	0.907498
AAEL000841	0.154688	0.875817
AAEL000842	-0.748839	0.565213
AAEL000844	-0.137432	0.634085
AAEL000845	0.328076	0.633269
AAEL000845	0.422754	0.0253678
AAEL000847	0.260015	0.205127
AAEL000848	0.308458	0.299552
AAEL000849	0.142035	0.585138
AAEL000850	-0.0838192	0.684697
AAEL000851	-0.230143	0.219683
AAEL000852	0.184556	0.647119
AAEL000853	0.313916	0.34361
AAEL000854	0.169056	0.425103
AAEL000855	-0.486365	0.00271957
AAEL000856	0.138608	0.380472
AAEL000857	-0.328655	0.0144428
AAEL000858	-0.333563	0.00569286
AAEL000859	0.62699	0.654342
AAEL000860	-0.547763	0.000180197
AAEL000864	0.150172	0.757758
AAEL000865	0.200793	0.883234
AAEL000867	0.349448	0.113858
AAEL000869	1.95344	7.54e-10
AAEL000874	0.512738	3.09e-05
AAEL000875	0.130236	0.62509
AAEL000880	0.0181252	0.953604
AAEL000883	-0.0235215	0.925414
AAEL000884	-0.125549	0.74037
AAEL000885	-1.4121	0.00148169
AAEL000888	0.0321745	0.890593
AAEL000890	-2.41506	0.291943
AAEL000893	0.455703	3.89e-05
AAEL000894	0.83846	2.71e-05
AAEL000895	0.00814517	0.994078
AAEL000896	1.31062	0.256445
AAEL000897	0.0495806	0.937842
AAEL000899	-0.0282979	0.953349
AAEL000900	1.14919	1.6e-10
AAEL000901	-0.129448	0.957801
AAEL000902	-0.0262836	0.94502
AAEL000903	0.419905	0.0499257
AAEL000904	-0.260692	0.719001
AAEL000905	-0.216146	0.426823
AAEL000906	0.0754236	0.796039
AAEL000907	0.443007	0.224413
AAEL000909	0.568111	0.470685
AAEL000914	-0.307788	0.711131
AAEL000916	0	1
AAEL000918	-1.43036	5.98e-09
AAEL000919	-0.706974	0.0600742
AAEL000920	0.875826	0.418617
AAEL000921	0.760858	0.0785419
AAEL000922	-0.0498146	0.914811
AAEL000923	-0.159388	0.885947
AAEL000924	0.283688	0.0383053
AAEL000925	0.0915373	0.628624
AAEL000927	0.749468	0.0924162
AAEL000930	-0.268644	0.0169595
AAEL000931	-0.968231	8.95e-08
AAEL000933	0.33912	0.209796
AAEL000934	-0.151944	0.295565
AAEL000936	0.335864	0.658439
AAEL000937	0	1
AAEL000938	0.296025	0.446858
AAEL000939	-0.344052	0.016594
AAEL000941	-0.163185	0.415686
AAEL000942	-0.26996	0.095819
AAEL000943	-0.207923	0.668184
AAEL000944	0.257634	0.0459346
AAEL000946	-1.72814	0.000811306
AAEL000947	-0.0885795	0.617445
AAEL000948	-1.15229	0.000876066
AAEL000949	-0.0374515	0.844124
AAEL000950	0.421053	0.000265229
AAEL000951	0.303687	0.0174732
AAEL000952	-0.0873336	0.790299
AAEL000953	-0.256318	0.226804
AAEL000954	0.0811316	0.97975
AAEL000955	0.0580506	0.816594
AAEL000956	0.399477	0.0755375
AAEL000958	0.244813	0.0876556
AAEL000959	-0.421369	0.876619
AAEL000960	-1.66878	0.505228
AAEL000962	-2.64556	4.78e-05
AAEL000963	0.111581	0.785935
AAEL000964	0.167282	0.780328
AAEL000965	0.278138	0.0389068
AAEL000967	-0.0305497	0.980708
AAEL000970	-0.534269	0.000274375
AAEL000970	-0.00157803	1
AAEL000972	1.67716	0.261673
AAEL000973	0.415214	0.0104542
AAEL000974	0.604891	0.351746
AAEL000975	-1.20704	0.0902606
AAEL000978	0.189098	0.567319
AAEL000979	0.145324	0.810785
AAEL000980	0.205012	0.772134
AAEL000981	0.497195	0.00643784
AAEL000982	0.0879518	0.649976
AAEL000983	-0.0662322	0.74264
AAEL000984	0.917341	6.02e-15
AAEL000985	0.0431591	0.853791
AAEL000986	-0.0259753	0.931043
AAEL000987	0.177122	0.231524
AAEL000988	-0.065362	0.874017
AAEL000990	0.220021	0.302359
AAEL000992	-0.587559	0.711529
AAEL000993	-0.136106	0.508228
AAEL000994	-0.749952	2.01e-10
AAEL000996	0.15703	0.496428
AAEL000999	1.14158	5.06e-22
AAEL001000	-0.553291	0.00661852
AAEL001001	0.224584	0.649567
AAEL001002	-0.469087	0.412706
AAEL001004	0.368287	0.0569856
AAEL001005	-0.253896	0.100424
AAEL001007	0.183083	0.188957
AAEL001008	0.182275	0.811542
AAEL001009	0.244231	0.480106
AAEL001010	-1.21746	3.81e-06
AAEL001011	-0.156141	0.682059
AAEL001014	-0.0524314	0.868453
AAEL001016	-0.0165676	0.983118
AAEL001017	-0.108961	0.755665
AAEL001019	0.323151	0.189896
AAEL001024	-0.134299	0.639442
AAEL001026	-4.06165	0
AAEL001029	0.589316	0.0311218
AAEL001030	0.336487	0.0307853
AAEL001031	-0.45745	0.0130942
AAEL001032	0.538597	0.00293299
AAEL001033	0.0094049	0.995003
AAEL001036	0.16661	0.288054
AAEL001037	0.130297	0.461851
AAEL001038	-0.0290958	0.95504
AAEL001039	0.0883303	0.81076
AAEL001041	0.38563	0.634116
AAEL001042	0	1
AAEL001044	0.218795	0.0889582
AAEL001045	-4.60592	1.3e-27
AAEL001046	-0.319619	0.0246342
AAEL001047	0.563091	0.000830915
AAEL001048	-0.186391	0.350017
AAEL001050	-3.41246	6.74e-12
AAEL001052	-0.341609	0.0262474
AAEL001054	-0.220847	0.928753
AAEL001056	-0.107955	0.444542
AAEL001060	-0.352565	0.123777
AAEL001061	-0.37172	0.349011
AAEL001062	-0.552757	3.38e-06
AAEL001065	-0.0869646	0.790927
AAEL001066	0.131412	0.884836
AAEL001068	-0.504612	0.496688
AAEL001069	0.332529	0.0103404
AAEL001071	0.681902	2.13e-10
AAEL001074	-2.5199	2.24e-05
AAEL001075	0.661486	0.47209
AAEL001077	0.11889	0.583499
AAEL001078	-1.29448	5.49e-20
AAEL001080	-0.0736875	0.867857
AAEL001081	-0.125134	0.963042
AAEL001082	-2.03284	4.05e-17
AAEL001084	-0.300344	0.319465
AAEL001085	-0.188129	0.783061
AAEL001086	0.36835	0.251578
AAEL001088	-0.214062	0.366046
AAEL001090	-0.852817	0.124074
AAEL001091	-1.99306	2.56e-05
AAEL001092	-0.201865	0.510803
AAEL001093	0.817602	0.0140289
AAEL001094	-0.263486	0.195874
AAEL001097	0.0265832	0.92224
AAEL001098	0.55444	0.000133714
AAEL001099	0.0478284	0.858072
AAEL001100	0.350712	0.0845539
AAEL001101	0.278996	0.0263865
AAEL001102	0.215758	0.235148
AAEL001103	0.0538711	0.789223
AAEL001104	-0.132986	0.446858
AAEL001105	-0.120123	0.763467
AAEL001106	-1.86548	2.49e-28
AAEL001107	-0.376448	0.718836
AAEL001108	-0.198224	0.791963
AAEL001109	0.0459208	0.8862
AAEL001110	-0.372053	0.745563
AAEL001111	-0.333928	0.00494309
AAEL001112	0.389499	0.000671778
AAEL001113	-0.32927	0.077941
AAEL001114	0.0743673	0.819232
AAEL001116	0.529212	0.191263
AAEL001118	-1.27647	9e-06
AAEL001119	-0.43981	0.00010407
AAEL001121	-0.0604024	0.737299
AAEL001123	-1.9905	0.116938
AAEL001124	-0.0312951	0.956316
AAEL001126	0.567779	3.74e-09
AAEL001127	-0.938578	0.000199207
AAEL001128	-0.113858	0.528573
AAEL001129	0.598166	5.69e-09
AAEL001131	-0.0148819	1
AAEL001132	0.0954282	0.689851
AAEL001133	0.0292049	0.96472
AAEL001134	-0.436771	0.000235432
AAEL001135	0.117939	0.792536
AAEL001136	-0.142792	0.769779
AAEL001137	-0.216685	0.470263
AAEL001138	-1.05706	0.0837786
AAEL001139	-1.7375	3.5e-12
AAEL001140	-2.40676	6.44e-10
AAEL001141	0.16982	0.184687
AAEL001142	-0.392347	0.0018042
AAEL001144	0.14569	0.392058
AAEL001145	-0.224987	0.0666083
AAEL001146	0.413375	0.736485
AAEL001147	-0.00469293	1
AAEL001148	-0.922319	1.26e-05
AAEL001149	-1.81245	3.81e-22
AAEL001150	-0.391839	0.645142
AAEL001151	-0.671591	0.310947
AAEL001152	0.186827	0.468013
AAEL001154	0.466788	0.00487697
AAEL001155	0.324756	0.336597
AAEL001156	-0.206754	0.772807
AAEL001157	-0.157394	0.65435
AAEL001158	-0.113119	0.626428
AAEL001159	0.1479	0.609856
AAEL001162	0.756754	2.7e-05
AAEL001163	-0.0841591	0.809287
AAEL001164	0.0438626	0.880792
AAEL001165	0.091322	0.692175
AAEL001166	0.492075	7.28e-05
AAEL001167	-0.901049	0.116535
AAEL001168	-0.188284	0.755671
AAEL001169	0.181499	0.248017
AAEL001170	-0.061015	0.833529
AAEL001171	0.516511	6.45e-05
AAEL001172	0.205141	0.443311
AAEL001173	-0.428699	0.0190624
AAEL001175	0.771822	0.000187035
AAEL001176	-0.109891	0.526468
AAEL001177	-0.0915344	0.692387
AAEL001181	-3.88951	5.1e-07
AAEL001182	0.00525934	1
AAEL001183	-0.233974	0.337524
AAEL001184	-0.209229	0.824604
AAEL001185	-0.54973	0.01991
AAEL001186	0.390791	0.314254
AAEL001187	0.127352	0.505588
AAEL001188	0.0671514	0.81027
AAEL001190	0.361833	0.14724
AAEL001191	0.0183823	0.983115
AAEL001192	0.0694859	0.877683
AAEL001193	-5.32838	6e-05
AAEL001194	-0.375217	0.3065
AAEL001198	-0.475948	0.0107462
AAEL001199	0.0260575	0.973822
AAEL001200	0.17686	0.595731
AAEL001201	-0.172576	0.279016
AAEL001202	0.396152	0.253917
AAEL001203	-0.645021	0.00297622
AAEL001204	0.296217	0.00675679
AAEL001205	-0.303659	0.0121227
AAEL001206	0.139082	0.383538
AAEL001207	0.00381329	1
AAEL001208	-2.1982	0.00327754
AAEL001209	0.316073	0.0156305
AAEL001210	0.0214954	0.952611
AAEL001211	0.446224	0.00366305
AAEL001212	-0.054498	0.808066
AAEL001215	0.0383575	0.88292
AAEL001216	0.1385	0.319656
AAEL001217	-0.953863	0.368154
AAEL001218	0.0784055	0.667583
AAEL001219	-1.91923	7.11e-05
AAEL001220	-0.435216	0.000422459
AAEL001223	-0.370438	0.017165
AAEL001227	-0.432311	0.52559
AAEL001228	-2.11605	0
AAEL001229	0.538429	0.421
AAEL001230	-2.70704	0
AAEL001232	-0.607176	0.0819828
AAEL001233	-0.711007	3.28e-05
AAEL001235	0.11237	0.731607
AAEL001236	0.0807081	0.916742
AAEL001237	-1.53284	0.289224
AAEL001238	-0.0230898	0.938879
AAEL001239	-0.186518	0.903538
AAEL001240	-0.566365	0.493021
AAEL001241	0.423571	0.773721
AAEL001242	-0.378731	0.135601
AAEL001243	-0.717946	0.000614755
AAEL001244	-0.575511	2.92e-07
AAEL001245	0.326774	0.32203
AAEL001246	0.944055	7.38e-07
AAEL001247	0.33393	0.806374
AAEL001249	0.241177	0.663155
AAEL001250	0.0457247	0.903199
AAEL001251	0.235775	0.703064
AAEL001252	-0.498368	2.44e-06
AAEL001254	0.0116143	0.973016
AAEL001255	0.106277	0.541839
AAEL001257	-0.85525	0.161439
AAEL001260	0.338156	0.19722
AAEL001261	0.285727	0.505588
AAEL001264	0.261036	0.126202
AAEL001266	0.0547785	0.804942
AAEL001269	0.0473055	0.88711
AAEL001270	0.195214	0.226513
AAEL001271	-1.30786	4.07e-10
AAEL001273	-0.520609	4.29e-07
AAEL001275	-0.0417525	0.835678
AAEL001276	-0.00112473	1
AAEL001279	-0.182581	0.318325
AAEL001281	-1.08241	0.558623
AAEL001282	0.537931	0.138046
AAEL001283	2.22274	0.154253
AAEL001284	-1.13645	0.0171242
AAEL001287	-2.47592	0.0736427
AAEL001289	-0.000662908	1
AAEL001290	-0.696806	0.810211
AAEL001293	-0.173325	0.329634
AAEL001294	-4.02146	0.0152171
AAEL001295	1.62125	5.9e-10
AAEL001296	-0.622588	2.07e-09
AAEL001297	-0.135719	0.701399
AAEL001298	0.193282	0.731505
AAEL001299	0.291402	0.040078
AAEL001300	0.526234	2.55e-05
AAEL001301	-0.422827	0.874479
AAEL001304	-0.633054	1.29e-10
AAEL001305	0.324507	0.385313
AAEL001306	3.37008	0
AAEL001307	-0.193202	0.138967
AAEL001308	-0.157725	0.75372
AAEL001313	-0.215841	0.340211
AAEL001314	0.211889	0.266378
AAEL001315	0.234872	0.163344
AAEL001317	0.208482	0.178221
AAEL001318	0.79772	0.000936445
AAEL001319	0.688978	0.10254
AAEL001320	0.95099	7.68e-07
AAEL001321	0.466411	6.03e-06
AAEL001322	0.437855	5.98e-05
AAEL001323	1.9561	0
AAEL001324	0.768649	3.94e-09
AAEL001325	0.47027	0.0175062
AAEL001326	0.71068	0.0132517
AAEL001328	-0.00722591	0.996658
AAEL001329	0.145056	0.62721
AAEL001330	-0.228298	0.496773
AAEL001331	0.317444	0.0194901
AAEL001332	0.154583	0.404203
AAEL001334	-0.471732	0.174806
AAEL001336	0.048558	0.836926
AAEL001337	-0.189756	0.471497
AAEL001338	-0.364417	0.62721
AAEL001339	0.257516	0.0430989
AAEL001341	0.0409691	0.858395
AAEL001343	-0.204197	0.457139
AAEL001344	-0.0690116	0.88455
AAEL001345	-2.24723	0.0146364
AAEL001346	-3.23635	1e-30
AAEL001347	0.319068	0.697777
AAEL001348	0.840325	0.0714355
AAEL001349	0.124141	0.881181
AAEL001350	0.0522019	0.832375
AAEL001351	0.0275301	0.9689
AAEL001352	0.0979625	0.585184
AAEL001353	-0.229223	0.0624808
AAEL001354	0.671749	0.0031928
AAEL001355	-0.0635416	0.847914
AAEL001356	0.0650015	0.763634
AAEL001357	-0.101776	0.865846
AAEL001358	-0.164754	0.610943
AAEL001359	-0.942118	0.00623603
AAEL001360	0.28787	0.0910955
AAEL001361	0.659721	2e-09
AAEL001363	0.375517	0.118222
AAEL001365	-0.414465	0.559796
AAEL001366	0.723946	0.0105457
AAEL001367	-0.424384	0.0576455
AAEL001368	-0.192367	0.195164
AAEL001370	-0.0384835	0.941978
AAEL001371	0.190542	0.910992
AAEL001372	0.155879	0.258872
AAEL001373	-0.246723	0.147019
AAEL001374	-0.947484	0.247687
AAEL001376	0.453436	0.562163
AAEL001378	-0.148239	0.409844
AAEL001379	0.222795	0.108903
AAEL001380	-1.45875	5.57e-09
AAEL001381	-0.938244	1.72e-06
AAEL001383	-0.793738	0.481894
AAEL001384	-0.135076	0.722278
AAEL001385	0.206913	0.457172
AAEL001386	0.261763	0.622411
AAEL001387	0.12754	0.644488
AAEL001389	0.0354628	0.881173
AAEL001391	2.02243	0.0958937
AAEL001392	-0.332292	0.135142
AAEL001393	-0.240745	0.0737195
AAEL001394	0.304452	0.0203974
AAEL001395	-0.0401205	0.912642
AAEL001396	0.422448	0.0147004
AAEL001397	0.127081	0.5051
AAEL001398	-0.40073	0.00103752
AAEL001399	0.945431	5.21e-10
AAEL001403	-0.226311	0.136303
AAEL001404	0.286308	0.143641
AAEL001405	-0.083582	0.692175
AAEL001406	-0.175472	0.169728
AAEL001407	0.731021	3.83e-13
AAEL001409	-0.172217	0.774014
AAEL001410	0.144331	0.544708
AAEL001411	0.155827	0.346996
AAEL001416	0.468514	0.000120609
AAEL001419	-0.881302	0.0978443
AAEL001421	-0.627639	4.88e-11
AAEL001422	0.0640019	0.819533
AAEL001423	-0.958637	0.000129259
AAEL001424	0.090677	0.843221
AAEL001425	0.752502	0.00542716
AAEL001426	0.255348	0.151483
AAEL001428	0.50896	0.00633736
AAEL001432	-0.0819204	0.705885
AAEL001433	-1.45819	2.18e-10
AAEL001434	0.581762	0.110628
AAEL001435	-0.297577	0.122427
AAEL001436	-1.1684	5.94e-10
AAEL001437	0.65771	5.92e-05
AAEL001438	0.170468	0.674932
AAEL001439	-0.0988606	0.788087
AAEL001440	0.131034	0.420976
AAEL001442	-1.53829	1.43e-09
AAEL001446	-0.800897	2.25e-10
AAEL001447	-0.216099	0.134208
AAEL001448	-0.51832	2.17e-05
AAEL001449	0.604802	0.0672969
AAEL001450	-0.0892572	0.843221
AAEL001451	0.48517	0.00821163
AAEL001454	-0.0902932	0.658931
AAEL001455	0.377318	0.0172081
AAEL001457	-1.46159	0.000348256
AAEL001458	-0.546758	0.638708
AAEL001459	-0.0163242	0.960324
AAEL001462	0.517492	1.23e-05
AAEL001463	-0.212342	0.857468
AAEL001464	-1.69058	8.33e-06
AAEL001466	0.285516	0.7844
AAEL001467	0.437348	0.000355405
AAEL001468	-0.105484	0.757579
AAEL001470	0.593935	0.0019141
AAEL001471	-0.0704574	0.739009
AAEL001472	0.0382143	0.902876
AAEL001473	-0.204917	0.161034
AAEL001474	0.224824	0.895524
AAEL001475	-0.121792	0.919257
AAEL001476	0.0046457	1
AAEL001477	-0.373422	0.000809388
AAEL001478	0.178682	0.567809
AAEL001479	0.203851	0.205446
AAEL001480	0.105206	0.512452
AAEL001481	-1.43426	6.27e-07
AAEL001482	0.0910303	0.789368
AAEL001483	-1.51248	0.0644932
AAEL001484	0.372744	0.000318251
AAEL001490	-0.77167	0.486103
AAEL001491	-0.706977	0.359343
AAEL001492	0.474749	0.206162
AAEL001493	0.107282	0.95567
AAEL001494	-0.794655	0.037995
AAEL001495	-0.194959	0.36199
AAEL001496	0.320709	0.00462569
AAEL001497	-0.433118	0.00472018
AAEL001498	-2.91656	0
AAEL001499	0.650176	0.103568
AAEL001500	-0.151596	0.32988
AAEL001501	0.0643841	0.836149
AAEL001503	0.0128679	0.981116
AAEL001504	-0.608299	1.17e-09
AAEL001505	0.284322	0.0632667
AAEL001506	0.133061	0.65143
AAEL001507	-0.567034	6.55e-07
AAEL001508	-1.12942	2.99e-06
AAEL001509	0.0889488	0.937198
AAEL001511	0.350834	0.0130549
AAEL001513	0.224802	0.255324
AAEL001514	0.979281	0.544621
AAEL001515	-0.280986	0.427796
AAEL001516	-0.0752046	0.725679
AAEL001517	-0.696155	0.81203
AAEL001518	0.154602	0.451405
AAEL001520	0.390348	0.0986869
AAEL001521	-1.76927	0.0136822
AAEL001522	-2.29338	0.125898
AAEL001523	-0.284608	0.628962
AAEL001524	-0.158952	0.732813
AAEL001525	0.0506616	0.844275
AAEL001526	0.280907	0.0423039
AAEL001527	-1.47908	2.06e-05
AAEL001528	-0.398993	0.18793
AAEL001529	0.584784	0.420999
AAEL001532	0.105289	0.534193
AAEL001533	-1.11314	0.00852549
AAEL001536	-1.91114	7.12e-05
AAEL001539	-0.422664	0.0532285
AAEL001540	-0.110366	0.52434
AAEL001542	-2.20397	0.0029238
AAEL001544	1.11994	0.319917
AAEL001545	0.867248	0.0426963
AAEL001546	-0.259359	0.100959
AAEL001547	-0.325979	0.721264
AAEL001548	0.499887	0.0971941
AAEL001549	0.105312	0.588482
AAEL001553	-1.04339	0.0135801
AAEL001554	0.421737	0.0185271
AAEL001556	-0.234177	0.324379
AAEL001557	-0.0649939	0.734903
AAEL001559	-0.190179	0.896851
AAEL001561	-0.10901	0.592265
AAEL001562	0.14751	0.567419
AAEL001563	-0.789981	0.00696529
AAEL001564	-0.465056	0.00869117
AAEL001565	0.442092	0.01551
AAEL001566	0.702725	0.215897
AAEL001567	1.1106	1.99e-15
AAEL001568	0.0581373	1
AAEL001569	0.19055	0.121304
AAEL001570	0.00124897	1
AAEL001573	0.0484822	0.890415
AAEL001574	-0.0817879	0.684334
AAEL001575	-1.14113	0.0227812
AAEL001576	0.0275201	0.93474
AAEL001578	-3.80143	0.0349116
AAEL001580	0.952351	8.95e-15
AAEL001581	-0.18114	0.287976
AAEL001582	-0.372642	0.125075
AAEL001583	-0.0863712	0.671963
AAEL001584	0.366455	0.00414156
AAEL001585	0.353377	0.418626
AAEL001586	-0.0847398	0.958005
AAEL001587	0.502998	2.88e-05
AAEL001588	0.59916	2.25e-06
AAEL001591	0.577317	0.256284
AAEL001592	-3.09799	2.98e-07
AAEL001593	-0.531312	3.54e-07
AAEL001594	-0.0847831	0.903859
AAEL001596	-0.465672	0.438739
AAEL001597	-0.688242	0.00140502
AAEL001598	-0.0445929	0.888916
AAEL001599	-0.195947	0.700136
AAEL001600	0.155124	0.63469
AAEL001604	-1.23477	4e-30
AAEL001605	0.431018	8.78e-05
AAEL001606	-0.252671	0.31268
AAEL001607	0.262031	0.371613
AAEL001610	0.287134	0.52954
AAEL001612	0.0156335	0.970269
AAEL001614	-0.062909	0.871062
AAEL001615	-0.303846	0.236029
AAEL001616	-0.0600357	0.778641
AAEL001618	0.118785	0.47544
AAEL001619	0.135956	0.597613
AAEL001622	0.0820874	0.682228
AAEL001623	0.278673	0.0125692
AAEL001624	0.406552	0.580756
AAEL001625	-0.437145	0.0432899
AAEL001626	-0.246812	0.410607
AAEL001627	-0.148027	0.470299
AAEL001628	0.797041	0.505039
AAEL001629	-0.638711	0.0135193
AAEL001631	0.480418	0.0905314
AAEL001632	-2.65066	1.97e-17
AAEL001635	1.23267	1.63e-08
AAEL001636	0.15423	0.35017
AAEL001637	2.64821	1.5e-13
AAEL001638	0.277069	0.0610725
AAEL001639	0.144698	0.465786
AAEL001640	-1.56815	1.37e-09
AAEL001641	-0.894069	0.00261914
AAEL001642	0.242578	0.271857
AAEL001643	0.461381	0.589911
AAEL001644	-0.489268	0.547512
AAEL001645	0.00550074	1
AAEL001646	-0.908441	0.122413
AAEL001647	-0.155352	0.361868
AAEL001648	-0.409656	0.000438116
AAEL001649	0.55665	8.94e-09
AAEL001651	0.211835	0.156794
AAEL001652	-2.09322	1.74e-13
AAEL001653	0.383621	0.241486
AAEL001655	0.847797	6.15e-12
AAEL001656	-0.598207	0.0111191
AAEL001657	0.183502	0.342443
AAEL001658	-0.141682	0.677625
AAEL001659	-0.429737	0.0240445
AAEL001662	-0.335487	0.0242016
AAEL001664	0.31728	0.0569017
AAEL001666	0.0535424	0.985258
AAEL001668	0.555207	6.28e-08
AAEL001671	-1.08837	2.05e-08
AAEL001672	-1.63365	1.85e-11
AAEL001673	-0.133141	0.822209
AAEL001675	-6.34162	0
AAEL001676	-0.428266	0.583795
AAEL001677	-2.41752	0.0055089
AAEL001678	-0.226153	0.866737
AAEL001680	0.163144	0.657474
AAEL001682	0.213304	0.293459
AAEL001683	-1.9044	0.000947392
AAEL001684	-0.130252	0.772134
AAEL001685	0.0857597	0.928758
AAEL001687	0	1
AAEL001688	0.0787208	0.708705
AAEL001689	0.037508	0.911631
AAEL001694	0.564154	0.819514
AAEL001695	-0.544626	0.000344579
AAEL001696	0.489805	0.0837293
AAEL001698	-0.0296391	0.912642
AAEL001699	-0.0262254	0.950028
AAEL001702	-1.3916	3.89e-07
AAEL001704	-3.69899	2.6e-17
AAEL001707	-0.588128	0.00329841
AAEL001708	-4.13294	0
AAEL001709	0.00994623	0.981926
AAEL001710	0.0772472	0.885784
AAEL001711	-0.326938	0.236117
AAEL001715	0.179547	0.188281
AAEL001716	0.281862	0.0146973
AAEL001717	0.20316	0.474841
AAEL001719	-0.0649118	0.747512
AAEL001720	-0.0551743	0.939775
AAEL001721	-0.622838	0.0649001
AAEL001722	-0.979062	4.07e-14
AAEL001723	-0.288371	0.591135
AAEL001724	0.193888	0.587973
AAEL001725	-0.136555	0.597166
AAEL001727	-0.522625	0.458701
AAEL001729	0.248886	0.199664
AAEL001730	-0.688842	0.451516
AAEL001731	-0.00856016	0.996305
AAEL001734	-0.609084	0.223275
AAEL001735	-2.64044	0
AAEL001736	0.345857	0.669477
AAEL001738	-2.56961	2.09e-11
AAEL001739	0.0784552	0.822929
AAEL001742	0.26178	0.0277961
AAEL001744	-1.98696	1.5e-27
AAEL001745	-1.07954	2.14e-17
AAEL001746	-0.479248	0.000106552
AAEL001748	0.254275	0.544239
AAEL001749	-0.475386	6.98e-05
AAEL001751	0.140472	0.442974
AAEL001752	-0.361639	0.00425262
AAEL001754	0.0765492	0.986591
AAEL001755	-1.12099	0.282567
AAEL001756	0.350522	0.0310031
AAEL001757	0.329829	0.369813
AAEL001759	0.178455	0.20119
AAEL001760	-3.96243	0
AAEL001761	-0.14543	0.65495
AAEL001764	0.753905	5.94e-06
AAEL001765	0.0186873	0.969841
AAEL001766	-0.464893	0.0192623
AAEL001767	-0.256251	0.0414528
AAEL001769	0.222736	0.146083
AAEL001770	-0.177637	0.189661
AAEL001775	0.0367744	0.975913
AAEL001776	-0.11198	0.945857
AAEL001777	0.14838	0.856957
AAEL001778	-0.00639762	1
AAEL001779	-0.248957	0.0761431
AAEL001780	0.0460627	0.814347
AAEL001782	0.167474	0.413768
AAEL001785	0.824556	0.000141707
AAEL001787	0.067923	0.793451
AAEL001789	-0.106336	0.916093
AAEL001791	0.039914	0.851989
AAEL001792	-0.112898	0.887836
AAEL001795	0.257705	0.317878
AAEL001796	-1.42773	0
AAEL001797	0.158894	0.562841
AAEL001798	-0.714278	8.33e-12
AAEL001799	-2.64137	0
AAEL001800	-0.098901	0.734385
AAEL001802	0.140919	0.387263
AAEL001803	-0.77884	4.1e-15
AAEL001805	0.234691	0.56495
AAEL001808	-0.628429	5.52e-08
AAEL001809	-0.337808	0.0468662
AAEL001810	-0.272049	0.0241876
AAEL001812	-0.499736	8.63e-05
AAEL001813	-0.111143	0.577832
AAEL001815	0.147169	0.308623
AAEL001817	0.179391	0.449315
AAEL001818	-0.15507	0.869632
AAEL001819	0.102093	0.816567
AAEL001820	-0.142048	0.866604
AAEL001822	-0.243619	0.289428
AAEL001824	-0.337489	0.0235475
AAEL001827	0.413213	0.0425035
AAEL001830	0.025454	0.934303
AAEL001831	0.47325	0.000275152
AAEL001832	-0.31145	0.0237455
AAEL001833	-1.4473	2.43e-06
AAEL001835	-4.01217	0.01991
AAEL001836	-1.23052	3.04e-05
AAEL001838	-0.0644448	0.830206
AAEL001840	-0.266341	0.747512
AAEL001843	-0.281816	0.518265
AAEL001845	0.0598404	0.825433
AAEL001846	0	1
AAEL001847	0.0112693	0.977477
AAEL001848	0.144187	0.345936
AAEL001850	0.417663	0.00433397
AAEL001851	0.390616	0.0016403
AAEL001852	0.216012	0.5051
AAEL001853	0.432135	3.46e-05
AAEL001854	-0.344088	0.235298
AAEL001856	0.412226	0.0654317
AAEL001857	-1.46432	0.0620838
AAEL001858	-0.316861	0.116938
AAEL001859	-0.124561	0.516225
AAEL001860	0.00725689	1
AAEL001861	0.616746	1.55e-10
AAEL001863	0.286843	0.879886
AAEL001864	-0.691388	9.45e-11
AAEL001865	0.03959	0.887759
AAEL001867	-1.29558	0.00416375
AAEL001868	-4.04565	1.15e-06
AAEL001869	0.285196	0.0193849
AAEL001870	0.141737	0.848983
AAEL001871	-0.032211	0.976836
AAEL001872	-0.324516	0.00782437
AAEL001874	0.214392	0.143555
AAEL001875	0.589308	5.13e-05
AAEL001876	0.015537	0.973259
AAEL001878	-2.22607	4.65e-09
AAEL001879	1.0127	0.187264
AAEL001881	0.184652	0.688401
AAEL001883	0.0279093	0.929638
AAEL001884	-0.834932	0.109
AAEL001886	0.113711	0.772427
AAEL001887	1.106	2.21e-22
AAEL001888	0.155613	0.574112
AAEL001890	-0.310912	0.363825
AAEL001891	0.603932	2.49e-06
AAEL001893	0.0434649	0.839954
AAEL001894	-1.59644	2.82e-06
AAEL001896	-0.142819	0.335679
AAEL001897	-0.282705	0.0111374
AAEL001898	0.413564	8.59e-05
AAEL001899	-0.847358	0.569496
AAEL001900	0.562943	0.822668
AAEL001901	-1.02459	0.431158
AAEL001903	-1.39372	0.0027567
AAEL001904	0.0765457	0.684871
AAEL001905	0.406473	0.0152672
AAEL001906	-0.0793364	0.643784
AAEL001909	0.0767594	0.814347
AAEL001910	0.113574	0.5185
AAEL001912	0.161387	0.455801
AAEL001913	0.175578	0.250839
AAEL001914	-0.268495	0.0387989
AAEL001915	-0.687579	0.00291594
AAEL001916	0.0564299	0.778799
AAEL001918	-0.116677	0.566292
AAEL001919	0.209715	0.0979414
AAEL001920	0.488185	0.0530335
AAEL001921	0.235252	0.3065
AAEL001922	1.26144	3.88e-19
AAEL001925	0.915673	0.0001749
AAEL001928	-0.0856773	0.946902
AAEL001929	2.06523	6.98e-05
AAEL001930	-0.0280723	0.930534
AAEL001932	0.460173	0.443773
AAEL001934	0.234701	0.62721
AAEL001935	0.581243	3.77e-06
AAEL001936	-0.544303	0.0781606
AAEL001937	0.348744	0.166759
AAEL001938	-0.0584803	0.974989
AAEL001939	0.308772	0.00619049
AAEL001940	-0.259779	0.0785553
AAEL001941	0.543921	0.886296
AAEL001942	0.0916088	0.817851
AAEL001943	0.124984	0.741388
AAEL001945	0.174505	0.470013
AAEL001946	-0.0222264	0.964245
AAEL001948	-0.554188	0.0037913
AAEL001949	0.654593	0.435132
AAEL001950	0.13054	0.55003
AAEL001952	-0.05094	0.824074
AAEL001954	0.0792915	0.760279
AAEL001955	0.364016	0.188176
AAEL001957	-2.11425	6.43e-09
AAEL001958	0.141933	0.8977
AAEL001959	-1.12207	1.05e-21
AAEL001962	-0.260643	0.118366
AAEL001963	-0.931568	8.23e-09
AAEL001964	-1.18989	0.605669
AAEL001968	0.0376493	0.89096
AAEL001969	-1.00178	0.172072
AAEL001970	-1.17963	0.107562
AAEL001971	0.226199	0.3218
AAEL001972	0.379382	0.00837034
AAEL001973	-0.71068	0.177459
AAEL001974	-0.210551	0.402486
AAEL001975	0	1
AAEL001977	0.0971441	0.585073
AAEL001978	0.227518	0.678094
AAEL001979	-0.183655	0.152445
AAEL001981	-0.174093	0.876006
AAEL001982	0.306106	0.460886
AAEL001983	-0.204922	0.483189
AAEL001984	0.198371	0.39467
AAEL001986	0.830024	1.06e-10
AAEL001992	-0.235778	0.619585
AAEL001996	0.338838	0.0133812
AAEL001997	0.331767	0.0762642
AAEL001998	-1.19685	6.57e-08
AAEL002002	-0.106081	0.717013
AAEL002004	-0.72353	0.00110802
AAEL002006	0.701498	8.22e-06
AAEL002008	-0.180874	0.493804
AAEL002009	-0.14728	0.477815
AAEL002010	0.286827	0.348467
AAEL002012	0.105488	0.612565
AAEL002013	0.236524	0.535454
AAEL002014	0.0840602	0.725519
AAEL002016	-0.155509	0.399315
AAEL002018	-1.42933	0.00372493
AAEL002019	0.0143604	0.989464
AAEL002020	-0.598575	0.292426
AAEL002023	0.209578	0.308039
AAEL002025	-0.164041	0.524506
AAEL002033	0.150142	0.845942
AAEL002036	-0.035304	0.931043
AAEL002037	0.096736	0.734539
AAEL002039	-0.0604826	0.896558
AAEL002043	-1.31208	0.494584
AAEL002047	0.20537	0.173626
AAEL002048	-0.239033	0.136675
AAEL002050	0.389593	0.195772
AAEL002051	0.0896099	0.94475
AAEL002054	0.589669	0.0795575
AAEL002055	-1.63556	0.000178338
AAEL002056	0.228916	0.433911
AAEL002058	0.318159	0.779074
AAEL002059	0.0444596	0.91841
AAEL002060	0.199485	0.212305
AAEL002061	0.231852	0.0780599
AAEL002062	0.821851	0.000256604
AAEL002065	0.10337	0.629391
AAEL002066	-4.95702	0.00226894
AAEL002067	-5.91326	0
AAEL002068	0.178945	0.446923
AAEL002069	-0.0413426	0.930695
AAEL002070	-0.0220247	0.97889
AAEL002071	-0.550006	0.0689675
AAEL002072	-2.28399	1.37e-07
AAEL002074	-0.283286	0.305214
AAEL002077	0.0746485	0.684341
AAEL002078	0.0973395	0.750898
AAEL002079	0.0327898	0.960665
AAEL002080	1.24098	1.71e-18
AAEL002081	-0.0303211	0.910357
AAEL002082	-0.22664	0.0639498
AAEL002083	-0.217375	0.125191
AAEL002084	0.296045	0.0186114
AAEL002088	-2.00213	1.03e-08
AAEL002089	-0.0305023	0.937889
AAEL002090	0.310744	0.440694
AAEL002091	-0.237233	0.137856
AAEL002093	-1.23431	0.000300892
AAEL002094	1.6438	4.72e-14
AAEL002096	-0.579164	0.505652
AAEL002097	-0.130527	0.622272
AAEL002098	0.0981278	0.663214
AAEL002100	-0.624574	0.0352441
AAEL002101	0.132613	0.415415
AAEL002102	-0.732889	3.15e-05
AAEL002103	-0.0193507	0.9941
AAEL002104	-0.0212946	0.980373
AAEL002105	-0.314022	0.634385
AAEL002106	-0.0962512	0.838528
AAEL002107	0.697989	1.15e-07
AAEL002108	0.0223127	0.974941
AAEL002110	0.058618	1
AAEL002111	3.39284	0.000330595
AAEL002112	-0.346338	0.0133092
AAEL002113	0.572839	0.127153
AAEL002114	0.00204987	1
AAEL002115	0.412566	5.23e-05
AAEL002116	0.857398	0.447224
AAEL002117	0.81641	0.771334
AAEL002118	-0.00913521	0.983218
AAEL002119	-0.452429	0.00114347
AAEL002120	2.67911	0.0269981
AAEL002121	0.108813	0.559297
AAEL002122	-0.0729382	0.804653
AAEL002123	-1.94908	0
AAEL002124	-0.308057	0.749925
AAEL002125	0.0653159	0.766394
AAEL002126	0.193875	0.245107
AAEL002127	-0.162751	0.835796
AAEL002129	-0.0746632	0.855398
AAEL002130	0.293697	0.0279096
AAEL002132	-2.98651	2.73e-11
AAEL002133	-0.156266	0.822534
AAEL002134	0.120147	0.494985
AAEL002135	-0.0458419	0.886259
AAEL002136	0.738759	0.118658
AAEL002137	0.212025	0.0848693
AAEL002139	0.102026	0.624472
AAEL002141	-1.28813	0.269328
AAEL002142	-0.147816	0.772494
AAEL002143	-0.997235	0.219473
AAEL002144	0.0588795	0.880792
AAEL002145	0.0936594	0.638682
AAEL002146	-1.19064	0.0734276
AAEL002148	0.217035	0.453711
AAEL002151	0.189375	0.452881
AAEL002152	-0.913899	9.34e-13
AAEL002153	-0.535489	0.346854
AAEL002154	0.234156	0.162009
AAEL002155	0.00838319	0.991485
AAEL002157	0.132282	0.694579
AAEL002158	0.215813	0.858026
AAEL002160	0.301675	0.00954669
AAEL002161	0.0864645	0.868819
AAEL002162	0.255726	0.557118
AAEL002163	-0.2247	0.0919207
AAEL002164	-0.00309104	1
AAEL002165	-0.2639	0.37168
AAEL002166	-0.293065	0.00698677
AAEL002168	0.0689222	0.784486
AAEL002169	0.20431	0.521738
AAEL002170	-0.112069	0.789168
AAEL002171	0.341979	0.107458
AAEL002173	-0.477887	0.379908
AAEL002174	0.475046	0.591996
AAEL002175	0.0487092	0.82768
AAEL002179	0.3001	0.383156
AAEL002182	0.282118	0.0711054
AAEL002183	-0.0954588	0.61128
AAEL002184	-0.17255	0.324041
AAEL002186	0.00106509	1
AAEL002190	0.112077	0.651776
AAEL002194	1.71615	1.14e-23
AAEL002195	1.03781	9.24e-12
AAEL002197	2.16507	5.57e-23
AAEL002198	0.0725645	0.7795
AAEL002203	-4.20077	0.00854698
AAEL002205	0.125904	0.706516
AAEL002206	0.128455	0.459045
AAEL002207	0.110871	0.662676
AAEL002209	-1.67635	0
AAEL002213	-0.695675	0.809245
AAEL002214	-0.680079	1.59e-08
AAEL002215	0.400935	0.000262831
AAEL002216	0.248382	0.163232
AAEL002217	-0.893668	0.193131
AAEL002219	-0.260074	0.185238
AAEL002221	-0.21641	0.32755
AAEL002222	-0.139248	0.605963
AAEL002225	0.373848	0.270323
AAEL002226	0.0993984	0.615579
AAEL002230	0.110333	0.701872
AAEL002231	1.91992	7.17e-28
AAEL002232	0.291729	0.53746
AAEL002234	0.526062	0.353074
AAEL002235	0.157954	0.396172
AAEL002236	-2.70635	1.41e-06
AAEL002238	0.0279366	0.930695
AAEL002240	-0.173941	0.341939
AAEL002243	2.2254	0.148977
AAEL002244	0.327773	0.353102
AAEL002245	0.249533	0.555746
AAEL002246	-0.521735	0.00529723
AAEL002247	-2.65022	0.0371447
AAEL002248	0.0946165	0.725006
AAEL002249	0.0956683	0.679089
AAEL002250	0.640526	0.13173
AAEL002251	-0.213646	0.214913
AAEL002253	-0.468095	0.0179308
AAEL002254	-0.997396	0.404776
AAEL002255	0	1
AAEL002256	-1.90639	9.61e-11
AAEL002257	-0.461617	0.817568
AAEL002258	0.209561	0.19748
AAEL002259	0.39342	0.72748
AAEL002260	0.094828	0.644797
AAEL002261	-0.237504	0.352936
AAEL002262	-1.02451	0.100851
AAEL002265	-0.0690484	0.919008
AAEL002268	0.253704	0.338729
AAEL002269	-0.878679	6.84e-07
AAEL002270	0.507696	0.608586
AAEL002271	0.168221	0.235149
AAEL002272	0.221586	0.0635898
AAEL002273	-2.01033	0.0483778
AAEL002276	-0.685159	0.164072
AAEL002277	-0.055693	0.833529
AAEL002280	-0.0242693	0.947303
AAEL002282	0.211377	0.444353
AAEL002284	0.390678	0.0900396
AAEL002286	0.377047	0.0971857
AAEL002286	-0.168908	0.385957
AAEL002287	0.36082	0.0260396
AAEL002290	0.253596	0.0971941
AAEL002291	-2.1754	0
AAEL002292	0.268277	0.647119
AAEL002293	-0.127658	0.80496
AAEL002294	1.02124	1.56e-06
AAEL002295	0.21213	0.737107
AAEL002296	-0.119825	0.543608
AAEL002298	0.129585	0.735223
AAEL002299	0.171465	0.382712
AAEL002301	-0.0518468	0.907601
AAEL002302	0.0136425	1
AAEL002303	0.282184	0.524683
AAEL002304	-0.0122242	0.986882
AAEL002305	-2.41845	0.289331
AAEL002306	-0.473207	0.000204281
AAEL002307	-1.4416	7.75e-09
AAEL002308	0.836591	1.07e-06
AAEL002309	-0.403789	0.0362728
AAEL002310	0.816083	0.0283429
AAEL002311	-0.118187	0.874479
AAEL002312	0.2387	0.199443
AAEL002316	0.194544	0.756599
AAEL002317	0.40434	0.193425
AAEL002318	0.129485	0.420025
AAEL002319	0.65175	1.6e-08
AAEL002320	0.082883	0.956316
AAEL002321	-0.149382	0.741988
AAEL002322	0.0255777	0.950175
AAEL002323	-1.29213	8.82e-08
AAEL002329	-0.41347	0.0625651
AAEL002330	0.111239	0.878411
AAEL002334	0.0930036	0.568379
AAEL002335	0.408227	0.000319214
AAEL002336	0.112646	0.836149
AAEL002337	0.0898282	0.663037
AAEL002339	0.444146	0.0130121
AAEL002340	-0.109819	0.671733
AAEL002341	0.438068	0.0252138
AAEL002343	-0.342454	0.708941
AAEL002345	0.348758	0.224099
AAEL002346	-0.0913689	0.547839
AAEL002348	0.412719	0.00135537
AAEL002349	-0.506472	0.00806515
AAEL002351	-0.0495568	0.846992
AAEL002352	-0.165878	0.441637
AAEL002354	-1.48039	4.75e-12
AAEL002355	-0.120804	0.862223
AAEL002357	-2.61121	0
AAEL002358	0.16465	0.784373
AAEL002359	-1.09923	3.94e-24
AAEL002362	0.135954	0.684334
AAEL002363	-1.40237	1.94e-12
AAEL002365	0.298363	0.645142
AAEL002366	0.284858	0.378053
AAEL002367	-0.995844	0.134621
AAEL002369	0.197047	0.185369
AAEL002370	-0.0982264	0.598235
AAEL002371	-0.020654	0.977294
AAEL002372	0.0868737	0.674364
AAEL002374	-0.0302398	0.900608
AAEL002375	0.419747	0.159118
AAEL002376	0.0889389	0.73815
AAEL002377	0.556478	4.11e-07
AAEL002380	-0.17077	0.86987
AAEL002381	0.606934	1.35e-05
AAEL002382	-0.249568	0.158918
AAEL002384	-0.107553	0.664718
AAEL002385	0.695069	0.590097
AAEL002386	-0.0149054	0.973076
AAEL002387	0.15116	0.442137
AAEL002389	-0.144642	0.547135
AAEL002390	0.0978311	0.953212
AAEL002390	-4.13988	0
AAEL002392	-0.637349	7.9e-08
AAEL002394	-0.110863	0.853221
AAEL002395	0.0766006	0.751748
AAEL002397	-0.875937	0.189456
AAEL002398	0.0639474	0.955769
AAEL002399	-0.452117	0.00148169
AAEL002401	0.147438	0.323656
AAEL002402	-0.314343	0.162009
AAEL002403	0.5838	0.195503
AAEL002404	0.00394951	1
AAEL002406	-0.584224	0.18915
AAEL002407	0.283637	0.026408
AAEL002408	-0.268972	0.214444
AAEL002409	-0.839534	0.00260458
AAEL002411	-0.149418	0.428638
AAEL002412	-1.03383	1.73e-17
AAEL002413	0.805438	0.204204
AAEL002415	-0.368878	0.0313254
AAEL002416	-0.391558	0.00092366
AAEL002417	-1.23589	1.57e-20
AAEL002418	0.349411	0.211905
AAEL002419	-0.5078	0.000109028
AAEL002420	-0.23043	0.0470808
AAEL002421	-0.317208	0.725163
AAEL002422	-0.653038	0.145772
AAEL002423	-0.774639	2.47e-06
AAEL002426	0.460599	0.000808729
AAEL002427	0.0948635	0.636912
AAEL002430	-0.444672	0.0116353
AAEL002432	0.106528	0.728205
AAEL002433	-0.349184	0.315346
AAEL002434	-0.0855712	0.956645
AAEL002435	0.1881	0.206162
AAEL002436	-0.47121	0.00015357
AAEL002437	0.345314	0.00285569
AAEL002438	0.0691471	0.877607
AAEL002439	1.33306	7.18e-06
AAEL002440	-2.35806	0.000578097
AAEL002442	0.408726	0.505581
AAEL002443	0.85054	0.49804
AAEL002444	0.404098	0.339311
AAEL002446	0.364077	0.00427416
AAEL002447	0.351213	0.784486
AAEL002448	-0.234736	0.161538
AAEL002449	1.3082	1.62e-06
AAEL002450	0.282047	0.0340151
AAEL002451	-0.208585	0.31325
AAEL002452	-0.159336	0.89386
AAEL002455	0.388234	0.0195787
AAEL002456	0.789767	8.82e-08
AAEL002457	-0.473817	0.262345
AAEL002458	-1.2107	0.206162
AAEL002459	-0.136809	0.617468
AAEL002461	0.249032	0.421641
AAEL002462	0.390405	0.293325
AAEL002463	1.02981	0.254349
AAEL002464	-0.0539053	0.858142
AAEL002465	-0.153217	0.385662
AAEL002468	0.616589	0.000937252
AAEL002469	0.499401	2.19e-07
AAEL002470	0.0272591	0.982472
AAEL002471	0.125464	0.519349
AAEL002473	-0.0807369	0.900345
AAEL002474	1.17356	2.91e-13
AAEL002475	-0.0857888	0.680064
AAEL002478	0.193576	0.468467
AAEL002480	0.462715	0.000114998
AAEL002483	0.402501	0.00153293
AAEL002484	-2.09771	0.0174068
AAEL002486	0.00570633	1
AAEL002487	0.458902	0.0222699
AAEL002488	0.244656	0.0905314
AAEL002489	-0.0190328	0.991001
AAEL002493	-0.0413945	0.950175
AAEL002496	0.551388	0.54789
AAEL002498	-0.464264	0.00528161
AAEL002499	0.884224	1.8e-12
AAEL002500	0.819621	0.765419
AAEL002501	0.0933563	0.594176
AAEL002502	-0.188012	0.479692
AAEL002503	-0.579036	0.00205971
AAEL002504	-0.0232061	0.931138
AAEL002508	0.0872985	0.61433
AAEL002509	1.05925	0.532706
AAEL002510	0.0684889	0.791834
AAEL002511	-0.996934	0.000158616
AAEL002512	0.185605	0.227607
AAEL002513	-0.0946612	0.662746
AAEL002514	0.259301	0.0630309
AAEL002516	-0.415123	0.692419
AAEL002518	-0.338112	0.737418
AAEL002520	0.407493	0.285294
AAEL002521	0.133768	0.904014
AAEL002522	0.402158	0.1457
AAEL002523	-0.0569371	0.886807
AAEL002524	-0.236464	0.785703
AAEL002525	0.352165	0.00894311
AAEL002526	0.103498	0.714857
AAEL002527	0.338507	0.0155278
AAEL002528	-0.245268	0.397623
AAEL002529	0.397162	0.113069
AAEL002530	-0.583375	0.615783
AAEL002531	0.247441	0.586447
AAEL002532	0.35886	0.00243636
AAEL002533	-0.832899	0.00183254
AAEL002534	0.189396	0.139286
AAEL002536	-0.0694057	0.788898
AAEL002537	-2.51549	2e-29
AAEL002538	-1.29366	6.49e-05
AAEL002539	0.320341	0.0104509
AAEL002540	0.158527	0.382156
AAEL002542	-0.195802	0.227545
AAEL002543	0.340736	0.676071
AAEL002544	0.298338	0.223061
AAEL002545	-1.28253	0.294858
AAEL002546	-2.55745	4.74e-27
AAEL002547	-1.27913	4.88e-13
AAEL002548	0.0527141	0.820253
AAEL002549	-0.129328	0.929385
AAEL002550	-0.186341	0.173655
AAEL002551	0.277317	0.131449
AAEL002553	-1.33389	0.00996277
AAEL002554	0.189136	0.739036
AAEL002555	-0.0207461	0.998855
AAEL002556	0.463952	0.0561816
AAEL002557	-0.0531679	0.819232
AAEL002558	1.31652	0.554982
AAEL002559	-0.457903	0.000225379
AAEL002560	-0.590974	0.22729
AAEL002562	0.177706	0.84472
AAEL002563	0.222551	0.128258
AAEL002565	-1.606	2.02e-19
AAEL002566	-1.07983	0.551611
AAEL002567	-1.42448	7.07e-27
AAEL002568	-0.570912	0.315028
AAEL002569	0.910566	7.5e-05
AAEL002571	-3.30355	0
AAEL002572	-0.261129	0.295589
AAEL002574	-0.245406	0.63216
AAEL002575	0.486855	0.529014
AAEL002576	0.230066	0.887759
AAEL002578	-3.03823	0
AAEL002579	-0.233184	0.851276
AAEL002581	0.742034	9.77e-08
AAEL002582	-0.712584	0.618316
AAEL002583	0.0646267	0.746252
AAEL002586	-0.172186	0.903398
AAEL002587	-0.756236	0.00108273
AAEL002588	1.31293	0.271507
AAEL002590	-0.445506	0.00712928
AAEL002592	-1.06363	0.119438
AAEL002593	0.480488	0.000224514
AAEL002594	0.149722	0.305747
AAEL002595	-0.588601	2.47e-05
AAEL002597	-0.103134	0.65394
AAEL002598	-0.825969	0.0234316
AAEL002599	-1.55683	6.4e-06
AAEL002600	-1.14079	0.0136075
AAEL002601	0.768297	0.00967643
AAEL002607	0.45034	0.00021974
AAEL002608	0.299387	0.604926
AAEL002611	0.082196	0.969881
AAEL002612	-0.696329	0.80948
AAEL002613	-1.66778	0.505039
AAEL002614	-1.06667	3.16e-08
AAEL002615	-0.430195	0.310062
AAEL002616	0.0493066	0.909392
AAEL002618	-0.614253	0.0483722
AAEL002621	-0.0325847	0.897404
AAEL002622	-1.30179	3.26e-11
AAEL002624	-0.69788	1.55e-05
AAEL002625	1.72491	0.481531
AAEL002627	0	1
AAEL002628	-0.492266	4.16e-05
AAEL002629	-0.30024	0.05484
AAEL002630	0	1
AAEL002632	-0.579964	0.0162247
AAEL002636	-0.127905	0.684371
AAEL002637	-0.617739	0.0177181
AAEL002638	0.770874	0.496504
AAEL002639	0.254768	0.049861
AAEL002640	-0.228392	0.241712
AAEL002641	0.757657	0.422453
AAEL002642	0.103999	0.908472
AAEL002644	0.139941	0.709405
AAEL002645	-0.121011	0.497014
AAEL002646	-0.103899	0.525634
AAEL002647	0.472439	0.036176
AAEL002651	0.0360045	0.909608
AAEL002652	0.0363983	0.94475
AAEL002653	-0.25066	0.0377259
AAEL002657	-1.81155	0.00398536
AAEL002658	0.0249685	0.997721
AAEL002659	0.0960658	0.686795
AAEL002660	0.208506	0.0830658
AAEL002662	1.40261	1.41e-06
AAEL002663	0.0645781	0.786914
AAEL002665	0.747189	0.14226
AAEL002668	-0.548485	0.336201
AAEL002669	-0.0235637	0.946743
AAEL002672	0.6085	0.0704135
AAEL002673	-1.12359	7.82e-05
AAEL002675	0.158635	0.430757
AAEL002676	0.0745932	0.991485
AAEL002678	-0.470969	0.00230462
AAEL002680	-0.217464	0.328436
AAEL002682	0.932723	0.641276
AAEL002684	-0.851236	2.44e-12
AAEL002687	-0.13964	0.42682
AAEL002688	0.137876	0.507527
AAEL002690	-0.235908	0.561881
AAEL002691	-0.0163112	0.958894
AAEL002692	-0.629953	0.000946387
AAEL002694	-0.122666	0.528939
AAEL002698	0.225062	0.0757537
AAEL002699	-1.31178	1.32e-16
AAEL002700	0.203544	0.145886
AAEL002701	-0.33007	0.0816087
AAEL002703	0.2964	0.611209
AAEL002705	-0.0388619	0.876313
AAEL002706	0.0440097	0.934312
AAEL002709	0.126283	0.65495
AAEL002711	-1.17751	2.74e-06
AAEL002712	-0.0198543	0.997721
AAEL002713	1.81547	1.98e-18
AAEL002714	1.06836	3.13e-19
AAEL002716	-1.93574	0.00331428
AAEL002718	0.0129299	0.975743
AAEL002719	0.227896	0.423699
AAEL002720	-0.448754	0.0142896
AAEL002721	-0.0284449	0.911367
AAEL002723	-0.214213	0.36976
AAEL002724	0.147965	0.911367
AAEL002725	1.67331	4.83e-15
AAEL002727	-0.899864	0.159394
AAEL002728	-0.123706	0.505588
AAEL002729	0.106936	0.56908
AAEL002731	-0.721618	0.161068
AAEL002733	-2.62197	0.000106589
AAEL002735	-0.0990841	0.728936
AAEL002736	0.889393	1.69e-11
AAEL002740	0.0235764	0.934303
AAEL002741	1.67774	0.268558
AAEL002742	0.681229	0.394457
AAEL002750	0.377623	0.0759283
AAEL002751	0.155172	0.293123
AAEL002752	0.318199	0.118366
AAEL002754	-0.0204351	0.952523
AAEL002756	-2.15171	4.35e-15
AAEL002758	0.708584	6.62e-05
AAEL002759	0.715335	6.12e-09
AAEL002760	-0.171553	0.556042
AAEL002761	-0.13448	0.406882
AAEL002764	0.0477603	0.866719
AAEL002765	-0.150753	0.665871
AAEL002766	0.317762	0.301326
AAEL002767	-0.286872	0.371492
AAEL002769	0.514237	8.51e-05
AAEL002770	0.250329	0.605669
AAEL002771	0.577117	1.49e-07
AAEL002772	0.338802	0.0144346
AAEL002774	-0.0104101	0.980615
AAEL002775	-0.44246	0.0995971
AAEL002776	-0.133531	0.775305
AAEL002777	-0.803882	0.00139067
AAEL002780	0.621174	0.550726
AAEL002781	0.0422283	0.950175
AAEL002782	0.301225	0.25308
AAEL002783	-0.00991361	0.994304
AAEL002784	0.0249126	0.944627
AAEL002785	1.34739	1.58e-08
AAEL002786	-1.96709	2.29e-11
AAEL002787	0.380737	0.253917
AAEL002788	0.579191	5.06e-07
AAEL002789	0.0927079	0.691172
AAEL002790	0.292322	0.307192
AAEL002791	-0.336969	0.010662
AAEL002793	-0.371154	0.243187
AAEL002794	0	1
AAEL002795	-0.0322562	0.962943
AAEL002796	-0.0145432	0.997721
AAEL002797	0.0132317	0.981745
AAEL002798	0.34749	0.0347495
AAEL002800	1.22753	2.48e-24
AAEL002801	0.292948	0.406726
AAEL002802	0.115466	0.553506
AAEL002803	-2.00033	2.01e-06
AAEL002804	0.0285762	0.93675
AAEL002805	-0.0344959	0.911111
AAEL002806	-0.0193244	0.997721
AAEL002808	-0.257479	0.415415
AAEL002809	0.114747	0.767765
AAEL002810	1.27178	5.08e-21
AAEL002811	1.15403	0.0835736
AAEL002812	0.431833	0.220328
AAEL002813	0.0808452	0.705265
AAEL002814	0.084024	0.942904
AAEL002815	-0.611551	5.33e-08
AAEL002817	0.105257	0.628962
AAEL002818	0.230957	0.104303
AAEL002819	0.371579	0.0846538
AAEL002820	0.173941	0.341939
AAEL002822	0.252188	0.366276
AAEL002823	-0.133688	0.433675
AAEL002824	0.20097	0.228135
AAEL002825	-0.00377162	1
AAEL002827	0.199276	0.617618
AAEL002828	0.212196	0.288233
AAEL002829	-0.293508	0.0411344
AAEL002830	0.402598	0.220278
AAEL002831	-0.228307	0.553304
AAEL002832	0.186342	0.196527
AAEL002833	0.232386	0.115061
AAEL002834	1.06819	8.12e-19
AAEL002835	0.0142203	0.97473
AAEL002836	0.0315754	0.944673
AAEL002837	-0.0396795	0.922277
AAEL002839	-0.0990536	0.791648
AAEL002840	0.020204	0.969628
AAEL002841	-0.229717	0.177463
AAEL002842	-0.133996	0.76198
AAEL002843	-0.0437156	0.914811
AAEL002844	0.128759	0.594846
AAEL002846	-0.621417	0.0099466
AAEL002847	0.0121832	0.998065
AAEL002848	-0.548056	2.53e-05
AAEL002849	0.104255	0.80948
AAEL002850	0.182894	0.235098
AAEL002851	0.249941	0.0132438
AAEL002852	0.401109	0.100975
AAEL002853	-0.991487	0.0170437
AAEL002854	0.450427	0.158607
AAEL002856	0.182552	0.332588
AAEL002858	-1.2185	0.00761151
AAEL002860	0.00283237	1
AAEL002861	0.64012	0.207206
AAEL002862	-0.0173019	0.96586
AAEL002863	0.56015	0.000537731
AAEL002864	0.251061	0.0821207
AAEL002866	0.281331	0.0305205
AAEL002867	0.0721878	0.885784
AAEL002868	-0.517186	0.0829463
AAEL002869	0.101269	0.589976
AAEL002870	0.617451	1.9e-09
AAEL002871	-0.353157	0.000864379
AAEL002873	0.0290788	0.982894
AAEL002874	0.549405	0.0290071
AAEL002875	-1.29267	0.0259399
AAEL002876	-2.64004	4.72e-05
AAEL002877	-0.167742	0.852521
AAEL002879	-1.8542	0.00365864
AAEL002880	-0.443602	0.574294
AAEL002881	-0.0578705	0.812463
AAEL002882	0.538616	3.1e-06
AAEL002883	-0.0527666	0.916742
AAEL002885	0.0703401	0.703064
AAEL002886	0.24094	0.1002
AAEL002887	-0.0127345	0.970178
AAEL002888	0.00617126	0.999408
AAEL002890	0.272432	0.0371793
AAEL002891	0.780354	4.03e-11
AAEL002892	-0.734206	0.000147974
AAEL002893	-2.86097	2.91e-14
AAEL002895	0.0801984	0.710392
AAEL002896	-1.46129	6.2e-29
AAEL002898	-0.113242	0.835068
AAEL002900	0.0576113	0.894485
AAEL002902	-0.0374645	0.96014
AAEL002903	-0.298488	0.0143246
AAEL002904	-0.135804	0.702048
AAEL002906	0.115102	0.468816
AAEL002909	-1.6685	0.5051
AAEL002910	0.554802	4.13e-05
AAEL002912	0.174515	0.37967
AAEL002913	-0.162202	0.316434
AAEL002915	-6.31083	0
AAEL002917	-0.458503	0.787749
AAEL002918	0.0664763	0.90341
AAEL002919	-1.53208	0.309265
AAEL002920	-2.9099	0.172844
AAEL002921	1.0671	4.69e-13
AAEL002922	-0.271589	0.609027
AAEL002924	-0.451922	0.000162751
AAEL002925	0.164226	0.479226
AAEL002930	0.206279	0.491689
AAEL002933	0.000365727	1
AAEL002934	0.398285	0.0813068
AAEL002935	0.159477	0.54789
AAEL002936	0.273159	0.0211379
AAEL002938	0.103773	0.53615
AAEL002939	-0.356279	0.20858
AAEL002941	-0.476395	0.423502
AAEL002943	0.304213	0.022027
AAEL002944	0.16341	0.369267
AAEL002945	0.161081	0.819638
AAEL002946	0.0438902	0.832094
AAEL002948	0.0867405	0.849299
AAEL002949	-0.267122	0.874112
AAEL002950	-0.544997	0.19281
AAEL002951	0.0866769	0.916697
AAEL002952	-2.30745	6.98e-05
AAEL002953	-0.123325	0.582495
AAEL002954	-0.260543	0.797023
AAEL002955	0	1
AAEL002957	-5.76377	0
[truncated: 9,119 more rows]

## Sheet: 6 dpov
Gene	Log2FC in Diapause	FDR corrected p-value
AAEL000001	-1.04201	8e-14
AAEL000003	-0.571345	0.000113895
AAEL000004	1.06514	5.09e-21
AAEL000005	-1.23136	1.7e-07
AAEL000006	0.519723	0.000838448
AAEL000008	0.248476	0.135372
AAEL000013	-0.30465	0.0549868
AAEL000015	0.270131	0.0479365
AAEL000016	-0.472358	0.000405046
AAEL000020	-0.185257	0.626975
AAEL000021	1.00414	7.78e-14
AAEL000022	-0.546662	0.012912
AAEL000024	0.0951841	0.940917
AAEL000026	1.57924	9.36e-28
AAEL000028	-0.964782	0.000174255
AAEL000029	0.521029	0.00102855
AAEL000032	-0.204545	0.0758989
AAEL000033	-0.607311	0.00420528
AAEL000038	-1.12922	2.14e-08
AAEL000040	-0.276719	0.491688
AAEL000041	0.819225	0.406065
AAEL000042	-1.32308	2.98e-07
AAEL000046	-1.34091	0.128497
AAEL000049	0.557203	0.0134389
AAEL000050	0.124119	0.654158
AAEL000053	-0.171056	0.810268
AAEL000054	-0.214062	0.222616
AAEL000055	-0.163364	0.4199
AAEL000057	-0.740153	0.265455
AAEL000060	0.922261	0.102099
AAEL000062	-0.560653	0.00951215
AAEL000064	-0.6444	1.88e-06
AAEL000065	0.135978	0.63879
AAEL000070	0.501447	0.000213922
AAEL000073	0.727398	0.345195
AAEL000074	-1.2932	2.81e-13
AAEL000077	-1.1745	1.04e-28
AAEL000078	0.348856	0.393705
AAEL000079	-0.681841	0.000250906
AAEL000080	0.66394	1.01e-06
AAEL000081	-0.144265	0.269042
AAEL000083	-0.277088	0.587076
AAEL000084	-0.0695364	0.700921
AAEL000085	4.56056	2.53e-91
AAEL000088	-0.075651	0.790244
AAEL000089	0.877507	0.207033
AAEL000090	0.0091951	0.964707
AAEL000091	0.36487	0.0328625
AAEL000092	-1.75797	1.54e-30
AAEL000093	0.799044	2.14e-10
AAEL000094	4.02295	7.71e-149
AAEL000097	0.394918	0.61867
AAEL000098	3.10244	2.86e-109
AAEL000099	-1.36332	2.92e-25
AAEL000101	-0.759968	0.000315113
AAEL000102	-0.951186	3.47e-11
AAEL000104	1.06321	4.25e-08
AAEL000105	0.930936	0.440028
AAEL000106	0.202617	0.506229
AAEL000107	-0.0584235	0.872514
AAEL000109	1.06452	2.04e-30
AAEL000111	-1.672	4.15e-17
AAEL000116	-0.316012	0.149427
AAEL000118	-0.0917144	0.703566
AAEL000119	-0.489063	0.0521272
AAEL000121	-0.317768	0.137978
AAEL000122	-0.0124385	0.9857
AAEL000123	-0.730427	0.286677
AAEL000126	-0.255869	0.0326108
AAEL000128	-0.342205	0.0137465
AAEL000131	-4.0117	2.48e-25
AAEL000132	0.282668	0.72665
AAEL000134	-0.0511943	0.847948
AAEL000135	-4.02926	5.53e-102
AAEL000136	0.501016	0.797856
AAEL000137	-1.72331	6.11e-33
AAEL000138	-0.696064	0.00540969
AAEL000140	0.0484627	0.924198
AAEL000141	-0.173253	0.875931
AAEL000142	0.207236	0.490902
AAEL000143	0.290662	0.441715
AAEL000147	0.262865	0.388582
AAEL000149	0.34176	0.0947714
AAEL000151	-0.0179203	0.97134
AAEL000152	-0.125872	0.609951
AAEL000153	0.541908	0.0537629
AAEL000154	0.436398	0.140162
AAEL000157	0.315126	0.303648
AAEL000158	-1.19785	0.00101029
AAEL000159	-0.138711	0.384507
AAEL000161	-0.872868	1.47e-09
AAEL000163	-0.54753	0.00244553
AAEL000164	-0.406743	0.177707
AAEL000165	-0.266181	0.116939
AAEL000166	-0.0396664	0.961912
AAEL000170	0.309717	0.154358
AAEL000171	0.207748	0.806513
AAEL000172	0.150786	0.261396
AAEL000173	-1.11151	9.45e-07
AAEL000174	-0.0426293	0.958082
AAEL000175	-0.450227	1.32e-05
AAEL000176	0.286655	0.0531981
AAEL000178	-0.386417	0.0880466
AAEL000179	-0.0996544	0.577584
AAEL000180	-0.027175	0.968183
AAEL000181	0.0558665	0.741664
AAEL000184	-0.495172	0.038443
AAEL000185	-0.332095	0.0028056
AAEL000186	-1.31111	0.0132413
AAEL000187	0.0109771	0.968565
AAEL000188	3.6393	8.86e-34
AAEL000191	0.258531	0.034746
AAEL000192	0.919146	5.75e-12
AAEL000193	-0.178687	0.237357
AAEL000194	-0.156975	0.243926
AAEL000195	-0.436712	0.173285
AAEL000196	0.242139	0.806954
AAEL000197	0.384388	0.00314753
AAEL000199	-0.689639	4.35e-09
AAEL000200	-0.437935	0.224312
AAEL000201	-0.41276	0.101191
AAEL000202	-0.20329	0.853693
AAEL000204	0.605803	4.45e-05
AAEL000208	0.322155	0.00753365
AAEL000209	-0.326742	0.599033
AAEL000210	-0.517692	5.7e-05
AAEL000211	-1.76007	4.17e-13
AAEL000212	-0.765574	2.99e-14
AAEL000213	0.535223	0.161275
AAEL000214	0.294092	0.366831
AAEL000215	-0.294674	0.545162
AAEL000217	0.0983988	0.553868
AAEL000219	-0.483003	0.0127041
AAEL000220	0.0114475	0.991391
AAEL000221	0.238016	0.255605
AAEL000222	-0.0444616	0.894726
AAEL000227	-0.240424	0.112606
AAEL000228	0.127344	0.535205
AAEL000230	-0.424919	0.0867653
AAEL000231	-1.15145	2.31e-32
AAEL000233	-0.340043	0.0775359
AAEL000234	-0.361441	0.0761403
AAEL000235	-0.198205	0.140898
AAEL000236	0.216684	0.491117
AAEL000238	3.82953	3.2e-43
AAEL000239	-0.25878	0.0742298
AAEL000240	-0.0811941	0.815127
AAEL000241	-0.382211	0.0421368
AAEL000242	0.208	0.777101
AAEL000243	0.0274574	0.926695
AAEL000244	-0.179482	0.494325
AAEL000245	-0.540449	0.000582116
AAEL000246	0.506719	0.000125973
AAEL000248	0.414169	0.000456192
AAEL000250	-0.326091	0.45081
AAEL000251	-0.354803	0.0120997
AAEL000254	0.450638	0.0278513
AAEL000255	-0.263255	0.544946
AAEL000256	0.108275	0.55855
AAEL000257	-0.667297	2.8e-10
AAEL000258	-0.797668	5.84e-10
AAEL000260	1.13062	2.29e-11
AAEL000261	-0.159336	0.716463
AAEL000262	0.122978	0.794562
AAEL000263	0.532208	0.000517586
AAEL000264	-1.4221	9.43e-28
AAEL000265	0.331643	0.31138
AAEL000266	-0.781575	0.132156
AAEL000267	0.0720612	0.947745
AAEL000268	-0.581518	0.0683774
AAEL000269	-0.43663	5.24e-05
AAEL000270	-0.0142871	0.948685
AAEL000271	-2.14233	1.07e-26
AAEL000272	0.21205	0.663863
AAEL000273	-1.51999	1.12e-58
AAEL000276	-0.841917	1.69e-18
AAEL000277	0.334745	0.0667673
AAEL000278	-0.96355	6.39e-15
AAEL000279	-0.180335	0.463253
AAEL000281	0.862687	7.55e-14
AAEL000284	-0.297707	0.422862
AAEL000285	2.98804	2.91e-61
AAEL000287	0.0230556	0.971855
AAEL000288	0.718817	1.87e-12
AAEL000289	-0.600887	0.00824463
AAEL000291	-1.03571	5.31e-23
AAEL000292	-0.0741359	0.828555
AAEL000293	-0.110565	0.444854
AAEL000294	-1.85237	5e-17
AAEL000295	0.161324	0.440168
AAEL000296	0.0390712	0.843401
AAEL000297	-0.812003	0.00022327
AAEL000299	0.411926	0.462302
AAEL000300	-1.29	0.000242604
AAEL000301	-0.986135	8.29e-25
AAEL000304	-1.34609	5.57e-31
AAEL000305	-0.15408	0.678218
AAEL000307	1.02539	0.0834401
AAEL000309	-0.16437	0.713881
AAEL000311	-1.12831	1.59e-22
AAEL000312	0.340861	0.303365
AAEL000313	0.849303	0.319928
AAEL000314	-0.526215	0.00156636
AAEL000315	0.0451556	0.833217
AAEL000316	1.75248	2.76e-21
AAEL000322	-0.118144	0.644863
AAEL000323	-5.6528	1.02e-101
AAEL000324	0.937914	5.59e-11
AAEL000327	1.06825	0.225921
AAEL000328	-0.427028	1.62e-05
AAEL000330	-0.360322	0.0312687
AAEL000331	-0.524741	0.00078449
AAEL000332	-0.354487	0.244261
AAEL000334	1.5392	1.65e-15
AAEL000335	0.926304	0.296002
AAEL000336	0.967962	1.19e-05
AAEL000337	-0.157777	0.779231
AAEL000338	-0.722763	0.0458306
AAEL000339	-0.618513	1.71e-07
AAEL000341	0.656375	1.58e-05
AAEL000342	-0.363215	0.0889579
AAEL000343	0.313717	0.0460997
AAEL000345	-0.225668	0.742994
AAEL000346	0.162718	0.838663
AAEL000349	-0.568605	0.139538
AAEL000353	0.892389	0.00153306
AAEL000362	-1.08254	1.44e-07
AAEL000365	-0.312156	0.0158553
AAEL000368	0.0344579	0.967965
AAEL000369	-3.85585	5.22e-86
AAEL000370	-0.560265	1.13e-06
AAEL000372	1.33217	0.00191308
AAEL000376	0.108318	0.861957
AAEL000378	-0.0398603	0.849891
AAEL000380	-0.0806362	0.782064
AAEL000383	0.135138	0.653187
AAEL000385	0.908093	8.5e-13
AAEL000386	-0.273499	0.0432175
AAEL000388	-1.08298	3.44e-27
AAEL000390	0.807612	0.46479
AAEL000393	0.416287	0.000169994
AAEL000394	-0.210669	0.265432
AAEL000395	-0.0190072	0.932546
AAEL000396	0.330226	0.116666
AAEL000397	0.213243	0.572544
AAEL000398	-0.0219999	0.966168
AAEL000399	-0.0506971	0.845783
AAEL000400	0.14563	0.736423
AAEL000401	0.22534	0.612969
AAEL000402	0.755474	1e-05
AAEL000403	-0.874736	4.69e-05
AAEL000404	-0.377294	0.0816436
AAEL000405	1.11382	0.000150868
AAEL000406	-1.8488	1.82e-08
AAEL000407	-0.0715014	0.811725
AAEL000408	-0.928276	0.000754012
AAEL000410	0.19511	0.133676
AAEL000411	-0.902496	0.00357121
AAEL000412	-0.154708	0.666703
AAEL000414	0.298686	0.248331
AAEL000415	0.340687	0.00627199
AAEL000416	0.920559	0.00142192
AAEL000417	0.161207	0.368406
AAEL000418	-0.560505	0.00257961
AAEL000419	1.49411	2.05e-35
AAEL000420	0.0711436	0.855322
AAEL000421	-0.113914	0.696342
AAEL000422	-0.883144	1.21e-12
AAEL000423	0.0909589	0.920673
AAEL000424	-0.249325	0.0324453
AAEL000425	-0.248914	0.411834
AAEL000427	-1.42894	2.1e-42
AAEL000428	-1.0063	1.25e-08
AAEL000429	-0.00146904	0.997761
AAEL000430	0.057618	0.761078
AAEL000431	-0.691717	2.85e-07
AAEL000432	0.10356	0.929752
AAEL000433	0.44809	0.00084328
AAEL000434	-0.669396	3.49e-05
AAEL000435	-0.242568	0.239518
AAEL000436	-0.5427	5.3e-06
AAEL000437	-0.239301	0.554576
AAEL000438	1.02835	4.63e-19
AAEL000439	-0.46156	0.314802
AAEL000440	-0.19484	0.189
AAEL000441	-2.58695	7.49e-11
AAEL000442	0.0685589	0.819104
AAEL000444	-0.70594	2.97e-12
AAEL000445	0.747644	0.00563307
AAEL000446	1.26938	6.46e-36
AAEL000448	0.208413	0.185209
AAEL000450	0.2234	0.151175
AAEL000451	0.228608	0.215706
AAEL000452	0.00022696	1
AAEL000454	-1.0608	7.86e-25
AAEL000455	0.140892	0.663695
AAEL000456	0.0832212	0.865851
AAEL000457	1.48268	0.00218546
AAEL000458	-0.725961	3.9e-07
AAEL000459	0.472706	0.00123467
AAEL000460	-0.38145	0.015057
AAEL000461	-0.460314	0.000233263
AAEL000463	-0.0926896	0.893581
AAEL000464	1.74813	1.5e-57
AAEL000465	0.00713824	0.992456
AAEL000466	-0.751235	0.0927642
AAEL000467	-0.0305418	0.938645
AAEL000468	0.351628	0.450093
AAEL000469	0.186978	0.190763
AAEL000471	0.535149	2.94e-05
AAEL000472	0.182249	0.439455
AAEL000474	-0.917058	4.62e-08
AAEL000475	-0.484087	0.00258413
AAEL000476	0.753199	0.330777
AAEL000477	-0.539486	0.00221382
AAEL000478	0.028808	0.943046
AAEL000479	-0.310455	0.380355
AAEL000481	-0.415828	0.336514
AAEL000483	0.356886	0.00184575
AAEL000484	4.52102	1.57e-126
AAEL000485	-0.459521	4.36e-05
AAEL000486	-0.335589	0.00143483
AAEL000487	0.326923	0.164799
AAEL000488	-0.110009	0.627658
AAEL000489	-0.325491	0.366453
AAEL000493	0.67841	0.0109052
AAEL000495	2.79915	4.8e-23
AAEL000498	-0.47944	0.355111
AAEL000500	-4.27708	3.89e-32
AAEL000502	-0.585699	0.0128132
AAEL000503	-0.0558718	0.946309
AAEL000504	0.542692	0.213174
AAEL000505	-1.57521	7.41e-14
AAEL000508	-0.705651	0.0108579
AAEL000509	0.258801	0.467091
AAEL000510	0.00264925	0.992403
AAEL000511	-0.510118	0.0158862
AAEL000512	0.14768	0.776571
AAEL000516	-3.75434	2.15e-57
AAEL000519	-6.98295	2.51e-197
AAEL000520	-2.1248	0.00485955
AAEL000522	-0.318805	0.125823
AAEL000523	0.312046	0.00327591
AAEL000524	-0.173194	0.618566
AAEL000527	-0.667451	0.000771602
AAEL000528	-0.665263	0.452399
AAEL000531	0.128466	0.491567
AAEL000532	1.66109	0.00236576
AAEL000536	0.382572	0.00110175
AAEL000539	1.93355	1.71e-10
AAEL000540	1.481	2.2e-37
AAEL000541	-0.378859	0.00161079
AAEL000546	-0.878424	0.00256995
AAEL000549	-1.96465	6.07e-52
AAEL000550	-0.682155	0.00058288
AAEL000551	-2.52578	1.11e-36
AAEL000553	0.143265	0.577584
AAEL000554	-4.50116	6.05e-48
AAEL000557	2.26153	2.67e-21
AAEL000558	0.772412	1.74e-06
AAEL000559	-0.0305628	0.906118
AAEL000561	0.353704	0.297023
AAEL000562	0.194872	0.28459
AAEL000564	0.417661	0.000565918
AAEL000565	-0.121929	0.600273
AAEL000566	-1.49226	0.0605461
AAEL000567	0.0309328	0.881495
AAEL000569	0.209641	0.254051
AAEL000570	1.39593	0.217186
AAEL000571	-0.2081	0.651322
AAEL000572	0.531637	5.63e-05
AAEL000573	0.150059	0.747071
AAEL000574	0.22941	0.0783196
AAEL000576	-0.407729	0.177366
AAEL000577	0.243944	0.067051
AAEL000578	-0.877166	0.00294127
AAEL000580	-1.11547	0.0011939
AAEL000581	-0.47318	0.000172163
AAEL000583	-0.0122595	0.972839
AAEL000584	-0.489948	0.196534
AAEL000585	-3.64795	1.42e-67
AAEL000586	0.54871	0.362257
AAEL000587	0.547469	0.500416
AAEL000588	-0.225155	0.303001
AAEL000589	0.0827271	0.56758
AAEL000590	-0.288891	0.0225253
AAEL000591	-0.460362	0.019563
AAEL000592	-0.801904	0.258248
AAEL000593	-1.79562	1.52e-20
AAEL000594	0.580818	0.50796
AAEL000595	0.0836039	0.813719
AAEL000596	-0.48699	0.0706438
AAEL000597	0.512803	0.00475911
AAEL000600	0.917029	2.36e-05
AAEL000602	0.205841	0.385943
AAEL000604	-0.341252	0.10817
AAEL000605	-0.0389502	0.91887
AAEL000607	-1.62352	0.00702825
AAEL000608	0.0429401	0.794599
AAEL000609	1.56327	2.79e-25
AAEL000612	-0.645912	0.0393073
AAEL000617	-0.138268	0.824345
AAEL000618	-1.23806	0.00161488
AAEL000620	0.112931	0.639953
AAEL000622	0.017585	0.929606
AAEL000623	0.957389	0.468953
AAEL000624	0.0202733	0.923443
AAEL000626	-2.08698	3.68e-05
AAEL000629	1.41129	6.36e-13
AAEL000630	1.81482	5.7e-07
AAEL000631	1.11858	2.22e-06
AAEL000634	-0.605551	4.81e-09
AAEL000635	0.0465916	0.829634
AAEL000636	-0.323678	0.355137
AAEL000638	-1.03902	0.138246
AAEL000639	-1.73072	0.000254118
AAEL000640	-1.64882	2.48e-27
AAEL000641	0.396276	0.000301448
AAEL000642	0.195751	0.520864
AAEL000643	0.515977	3.1e-05
AAEL000644	-1.2033	3.38e-13
AAEL000645	0.0421234	0.952216
AAEL000649	-0.518047	0.000100087
AAEL000650	0.740392	2.26e-09
AAEL000654	-0.649814	5.88e-08
AAEL000655	-0.251999	0.080784
AAEL000656	-0.092479	0.886848
AAEL000657	1.00711	2.86e-14
AAEL000659	-0.843228	0.00324952
AAEL000661	-0.131434	0.545162
AAEL000662	0.00317796	0.996286
AAEL000663	-1.10983	1.06e-11
AAEL000665	3.54398	5.98e-43
AAEL000666	-2.96827	1.58e-30
AAEL000669	-1.07282	0.0207864
AAEL000670	-0.316215	0.0379855
AAEL000671	0.354137	0.209574
AAEL000672	0.154871	0.47871
AAEL000673	-0.4424	0.00161594
AAEL000674	-0.647207	3.74e-07
AAEL000676	-1.08329	0.0922373
AAEL000677	-0.572072	0.000219234
AAEL000679	0.0346777	0.881241
AAEL000682	-0.12545	0.360562
AAEL000683	2.17903	1.67e-18
AAEL000685	-0.0353683	0.906653
AAEL000687	0.814459	0.318251
AAEL000691	0.452536	0.467732
AAEL000692	-0.919115	8.44e-05
AAEL000693	-0.193043	0.128122
AAEL000695	0.240667	0.344557
AAEL000696	0.14835	0.712819
AAEL000697	-0.12515	0.83897
AAEL000698	-0.0959577	0.865901
AAEL000699	-1.08774	0.000293117
AAEL000700	1.06472	1.1e-17
AAEL000701	-0.739153	4.41e-07
AAEL000702	0.557198	0.176754
AAEL000703	0.382074	0.00175963
AAEL000704	0.316516	0.570519
AAEL000706	-0.414725	0.000114867
AAEL000707	-0.253006	0.145991
AAEL000708	-1.08489	3.79e-10
AAEL000709	0.235802	0.15314
AAEL000711	-0.0676536	0.767526
AAEL000712	0.345424	0.271039
AAEL000713	0.0968082	0.497502
AAEL000714	-1.25965	0.000495504
AAEL000715	0.451407	0.014576
AAEL000716	-0.278587	0.245639
AAEL000717	1.11271	1.16e-15
AAEL000718	1.76544	1.2e-45
AAEL000719	-0.147053	0.312232
AAEL000720	0.672083	0.00019994
AAEL000721	0.327281	0.457901
AAEL000722	-0.161222	0.733853
AAEL000723	0.518455	0.0293791
AAEL000724	-0.5105	6.16e-05
AAEL000727	0.584574	0.25889
AAEL000728	-0.0356734	0.882807
AAEL000729	0.0790476	0.883133
AAEL000730	0.127227	0.362817
AAEL000731	-0.888503	0.306316
AAEL000733	2.63905	4.73e-93
AAEL000734	1.0055	1.82e-05
AAEL000736	2.41048	2.27e-06
AAEL000737	0.146822	0.305338
AAEL000738	-0.303946	0.0213787
AAEL000739	-0.171728	0.593704
AAEL000741	1.19391	6.31e-19
AAEL000742	2.49494	9.94e-09
AAEL000743	-0.0336802	0.855332
AAEL000744	0.7171	5.11e-06
AAEL000745	0.877198	1.15e-06
AAEL000746	-0.37973	0.00105197
AAEL000747	0.474489	0.000165958
AAEL000750	0.107808	0.50848
AAEL000752	0.419779	0.000627342
AAEL000753	-0.547763	6.54e-06
AAEL000755	-0.557524	0.335657
AAEL000758	-0.49631	4.72e-07
AAEL000759	-0.657239	1.06e-06
AAEL000761	-0.0788241	0.906534
AAEL000763	0.518737	0.000674234
AAEL000765	-0.0428659	0.948382
AAEL000766	-0.71907	7.51e-09
AAEL000767	-0.440397	6.25e-06
AAEL000770	-0.057436	0.745945
AAEL000771	-0.115885	0.851524
AAEL000772	0.374504	0.414244
AAEL000773	0.00461443	0.995028
AAEL000774	1.41523	0.00655213
AAEL000776	-0.458053	0.0754862
AAEL000778	-1.46658	3.86e-11
AAEL000780	-0.354287	0.0113392
AAEL000782	-0.40187	0.0475415
AAEL000784	-0.101536	0.877921
AAEL000785	0.485226	0.107511
AAEL000787	0.195156	0.462525
AAEL000788	0.488376	7.08e-05
AAEL000791	-0.311935	0.017696
AAEL000792	0.355239	0.699619
AAEL000794	-0.611606	2.31e-08
AAEL000798	-0.312563	0.00945458
AAEL000801	-4.26169	3.49e-19
AAEL000802	0.383837	0.00800975
AAEL000803	-0.720421	0.324015
AAEL000804	-0.0244131	0.905252
AAEL000805	0.309751	0.446622
AAEL000806	0.302219	0.524476
AAEL000807	0.113653	0.591073
AAEL000809	-1.05426	0.184178
AAEL000810	0.265709	0.335221
AAEL000811	0.163712	0.48529
AAEL000812	-0.527864	0.000564124
AAEL000815	0.0430864	0.832717
AAEL000816	-0.954141	5.45e-06
AAEL000817	0.199041	0.691839
AAEL000818	1.04452	8.11e-09
AAEL000819	0.330031	0.134613
AAEL000822	0.119946	0.424468
AAEL000823	-0.116141	0.450454
AAEL000824	1.39805	4.67e-44
AAEL000825	0.0375073	0.850866
AAEL000826	2.62931	2.71e-05
AAEL000828	2.1065	0.00566966
AAEL000832	-0.0971636	0.537916
AAEL000834	-0.0166029	0.967456
AAEL000836	-0.526527	0.064476
AAEL000838	1.37146	4.74e-29
AAEL000839	0.41919	0.382359
AAEL000840	-1.20546	6.97e-19
AAEL000841	-0.603365	0.409588
AAEL000842	-3.52223	4.08e-22
AAEL000844	-0.51214	0.00223995
AAEL000845	-0.702394	1.56e-05
AAEL000847	0.20282	0.395493
AAEL000848	0.0138963	0.974918
AAEL000849	0.475655	0.179198
AAEL000850	0.0743769	0.642094
AAEL000851	-0.213561	0.184438
AAEL000852	0.236018	0.532914
AAEL000853	-1.0056	0.0018142
AAEL000854	-0.417261	0.00585855
AAEL000855	0.895437	2.3e-10
AAEL000856	0.322483	0.00433392
AAEL000857	0.389359	0.00256348
AAEL000858	-0.60441	1.23e-09
AAEL000859	-4.21425	3.31e-48
AAEL000860	-0.151237	0.448782
AAEL000864	0.463279	0.295751
AAEL000865	-0.0294454	0.985531
AAEL000867	-0.345538	0.110833
AAEL000869	0.0101829	0.992456
AAEL000874	0.548373	5.88e-05
AAEL000875	0.0280207	0.93304
AAEL000880	0.0204509	0.925636
AAEL000883	-0.132428	0.349777
AAEL000884	-0.192237	0.514525
AAEL000885	1.01114	0.0659661
AAEL000888	0.112069	0.4485
AAEL000890	1.5948	0.00333486
AAEL000893	0.930393	7.58e-12
AAEL000894	1.96849	1.97e-08
AAEL000895	-2.2763	1.39e-89
AAEL000896	2.59008	8.61e-35
AAEL000897	-1.80407	6.08e-11
AAEL000899	0.60399	0.00121189
AAEL000900	-0.278266	0.498886
AAEL000901	-1.52779	3.48e-14
AAEL000902	-1.44164	6.05e-31
AAEL000903	-0.235455	0.411001
AAEL000904	-3.5291	3.97e-34
AAEL000905	-1.15031	5.17e-13
AAEL000906	0.333861	0.0509929
AAEL000907	0.394829	0.323417
AAEL000909	1.1255	4.17e-14
AAEL000914	0.131396	0.489845
AAEL000916	1.20318	0.200569
AAEL000918	0.389842	0.220989
AAEL000919	0.0308064	0.962118
AAEL000920	0.429992	0.552033
AAEL000921	0.745937	8.52e-05
AAEL000922	-0.765134	5.37e-05
AAEL000923	-1.15063	0.127108
AAEL000924	-0.274753	0.0903625
AAEL000925	-0.156017	0.358772
AAEL000927	-0.236796	0.726865
AAEL000930	-0.0233413	0.895775
AAEL000931	-1.61111	9.46e-22
AAEL000933	0.102586	0.726622
AAEL000934	-0.0288197	0.87357
AAEL000936	-0.826003	0.0789547
AAEL000937	-1.80163	0.000255488
AAEL000938	-0.993724	0.000621436
AAEL000939	0.213499	0.237723
AAEL000941	-0.874979	3.81e-13
AAEL000942	-0.109113	0.55695
AAEL000943	-0.297183	0.396876
AAEL000944	0.89345	7.99e-17
AAEL000946	2.01811	5.95e-07
AAEL000947	0.0853314	0.629062
AAEL000948	-0.18452	0.520401
AAEL000949	0.346474	0.00155005
AAEL000950	-0.628169	5.08e-09
AAEL000951	-0.347588	0.00301446
AAEL000952	-1.26548	3.67e-17
AAEL000953	0.126653	0.580593
AAEL000954	0.171093	0.727071
AAEL000955	-0.373683	0.00937568
AAEL000956	-0.637305	0.000111455
AAEL000958	0.0767712	0.669338
AAEL000959	0.118947	0.856411
AAEL000960	-1.72338	2.43e-07
AAEL000962	0.608992	0.247848
AAEL000963	-0.532765	0.0104771
AAEL000964	-0.481832	0.232873
AAEL000965	-0.352578	0.0041306
AAEL000967	-0.37014	0.437382
AAEL000970	0.511612	8.62e-05
AAEL000972	1.21949	0.0487615
AAEL000973	1.27525	1.37e-18
AAEL000974	0.18449	0.845658
AAEL000975	0.768516	0.359234
AAEL000978	-1.03922	4.94e-08
AAEL000979	0.1281	0.805452
AAEL000980	0.201499	0.771076
AAEL000981	-0.259554	0.231356
AAEL000982	0.104194	0.579273
AAEL000983	-0.0316224	0.87371
AAEL000984	1.046	1.18e-15
AAEL000985	-0.0323954	0.862096
AAEL000986	-0.74341	1.2e-11
AAEL000987	-0.173799	0.195431
AAEL000988	-1.03471	3.57e-09
AAEL000990	-0.240377	0.27589
AAEL000992	-0.088057	0.954412
AAEL000993	-0.135881	0.464109
AAEL000994	0.251069	0.0550361
AAEL000996	-0.800989	2.87e-09
AAEL000999	-0.061386	0.778531
AAEL001000	-0.368991	0.0532746
AAEL001001	-0.272748	0.640134
AAEL001002	-1.91668	1.79e-06
AAEL001004	-0.243744	0.306489
AAEL001005	0.306158	0.0371505
AAEL001007	-0.252958	0.0360828
AAEL001008	0.282481	0.652604
AAEL001009	-0.137107	0.713453
AAEL001010	0.0373252	0.934032
AAEL001011	0.326019	0.294199
AAEL001014	-0.281654	0.107397
AAEL001016	0.251138	0.279696
AAEL001017	0.327326	0.154062
AAEL001019	-1.73182	5.32e-31
AAEL001024	-2.42344	2.2e-82
AAEL001026	2.94894	3.62e-27
AAEL001029	-0.545017	0.0922643
AAEL001030	-0.122064	0.595005
AAEL001031	-0.843804	5.81e-09
AAEL001032	-1.62759	7.36e-23
AAEL001033	0.264181	0.27247
AAEL001036	-0.685689	6.31e-09
AAEL001037	-1.12259	2.43e-25
AAEL001038	-0.122311	0.67049
AAEL001039	-0.413131	0.047471
AAEL001041	0.428495	0.63321
AAEL001042	-3.54093	4.66e-14
AAEL001044	-0.776858	1.79e-15
AAEL001045	4.10027	3.07e-17
AAEL001046	0.432229	0.000571393
AAEL001047	-0.575651	0.000284423
AAEL001048	0.297056	0.0839077
AAEL001050	0.564955	0.0759923
AAEL001052	-0.24324	0.112394
AAEL001054	-1.42449	5.56e-09
AAEL001056	0.439436	2.52e-06
AAEL001060	-0.956568	1.68e-09
AAEL001061	0.965418	0.00218082
AAEL001062	0.500792	0.000203544
AAEL001065	0.0622695	0.837792
AAEL001066	-0.130512	0.837831
AAEL001068	-0.262422	0.757479
AAEL001069	-0.191992	0.168757
AAEL001071	0.321924	0.0630624
AAEL001074	2.89232	1.33e-12
AAEL001075	-0.414765	0.484184
AAEL001077	-2.85369	1.2e-109
AAEL001078	0.401711	0.0110481
AAEL001080	-0.630866	0.00407083
AAEL001081	-3.81632	2.48e-24
AAEL001082	-2.39389	1.67e-28
AAEL001084	-2.68094	1.04e-79
AAEL001085	-1.25631	9.64e-05
AAEL001086	0.0682444	0.887013
AAEL001088	-0.251203	0.224852
AAEL001090	-0.0890716	0.861267
AAEL001091	-1.97207	1.7e-58
AAEL001092	-1.1726	4.38e-12
AAEL001093	0.0117129	0.987471
AAEL001094	0.171893	0.385145
AAEL001097	0.487656	6.98e-05
AAEL001098	-3.33217	3.53e-124
AAEL001099	0.140703	0.447518
AAEL001100	-0.892818	1.42e-05
AAEL001101	-0.769203	2.26e-13
AAEL001102	-2.10917	1.68e-71
AAEL001103	0.179133	0.177655
AAEL001104	-0.224087	0.0793817
AAEL001105	0.208064	0.541429
AAEL001106	0.327399	0.114014
AAEL001107	-3.34436	1.52e-16
AAEL001108	-0.727054	0.0556889
AAEL001109	-0.20644	0.285097
AAEL001110	-0.75198	0.0283806
AAEL001111	0.102753	0.562115
AAEL001112	0.259968	0.0540839
AAEL001113	-2.47536	1.12e-73
AAEL001114	-0.6167	0.000870482
AAEL001116	0.206424	0.715413
AAEL001118	1.22465	7.1e-06
AAEL001119	0.699952	9.59e-10
AAEL001121	0.392124	8.62e-05
AAEL001123	-1.09176	0.217982
AAEL001124	-0.6159	0.00288911
AAEL001126	0.00663638	0.972224
AAEL001127	-0.588876	0.0028056
AAEL001128	-0.157453	0.303348
AAEL001129	-0.590408	4.58e-07
AAEL001131	0.512608	0.465038
AAEL001132	0.146264	0.490214
AAEL001133	-0.504565	0.0331872
AAEL001134	-2.6819	1.71e-138
AAEL001135	-0.20279	0.603809
AAEL001136	0.278635	0.510445
AAEL001137	1.14304	1.46e-07
AAEL001138	-0.0383208	0.97207
AAEL001139	0.560898	0.0219561
AAEL001140	0.368572	0.382472
AAEL001141	-0.0581216	0.707739
AAEL001142	0.596545	2.12e-07
AAEL001144	0.183737	0.281321
AAEL001145	0.368439	0.001684
AAEL001146	1.46936	2.45e-05
AAEL001147	0.0445645	0.851508
AAEL001148	0.548554	0.0241278
AAEL001149	-0.764651	4.18e-09
AAEL001150	-0.329486	0.716628
AAEL001151	-0.741516	0.00321482
AAEL001152	-0.218528	0.340776
AAEL001154	-0.837627	1.51e-07
AAEL001155	-0.0707675	0.881961
AAEL001156	0.186419	0.769529
AAEL001157	0.304446	0.276243
AAEL001158	1.44751	1.97e-29
AAEL001159	0.27829	0.233041
AAEL001162	-0.0129263	0.98118
AAEL001163	-1.59479	3.1e-19
AAEL001164	-0.740753	1.54e-09
AAEL001165	0.0764871	0.72109
AAEL001166	-0.368186	0.0246938
AAEL001167	-0.787228	4.47e-05
AAEL001168	0.512228	0.242044
AAEL001169	-0.959382	6.04e-19
AAEL001170	-0.369898	0.0343554
AAEL001171	-1.77365	4.44e-56
AAEL001172	-0.0385586	0.917138
AAEL001173	0.0995297	0.680915
AAEL001175	-0.233164	0.531193
AAEL001176	-1.19086	7.62e-32
AAEL001177	-0.265027	0.134193
AAEL001181	-0.387964	0.30888
AAEL001182	0.228203	0.326333
AAEL001183	-0.262779	0.228611
AAEL001184	1.14497	2.96e-13
AAEL001185	0.375902	0.121115
AAEL001186	0.329873	0.500916
AAEL001187	0.078874	0.733417
AAEL001188	-0.200702	0.269873
AAEL001190	-0.162192	0.558761
AAEL001191	-0.522631	0.0313677
AAEL001192	0.180911	0.563449
AAEL001193	-0.206008	0.732301
AAEL001194	-1.31866	8.01e-08
AAEL001198	0.43571	0.0073508
AAEL001199	-0.206216	0.556497
AAEL001200	-0.098335	0.757069
AAEL001201	-0.0775497	0.651217
AAEL001202	0.410958	0.367204
AAEL001203	-0.475815	0.00369547
AAEL001204	0.363325	0.000830465
AAEL001205	-0.164386	0.236681
AAEL001206	-0.25081	0.0392825
AAEL001207	0.271919	0.027024
AAEL001208	0.653611	0.0363352
AAEL001209	-0.106434	0.51554
AAEL001210	-0.758286	1.31e-10
AAEL001211	-0.314618	0.107286
AAEL001212	0.283843	0.031381
AAEL001215	0.332183	0.0104347
AAEL001216	-0.307157	0.00394908
AAEL001217	-0.141446	0.882285
AAEL001218	-0.576453	2e-08
AAEL001219	-2.87502	2.81e-11
AAEL001220	0.55862	3.85e-06
AAEL001223	0.564378	0.000288324
AAEL001227	-0.381808	0.453744
AAEL001228	1.41746	1.01e-21
AAEL001229	-2.21764	1.22e-05
AAEL001230	0.221406	0.123464
AAEL001232	-0.72043	9.58e-05
AAEL001233	1.58505	2.84e-32
AAEL001235	-0.635319	0.00115569
AAEL001236	-0.096932	0.853802
AAEL001237	4.21161	1.4e-125
AAEL001238	-1.05546	1.9e-22
AAEL001239	-0.86008	0.238096
AAEL001240	0.55315	0.227571
AAEL001241	-0.411449	0.0369162
AAEL001242	-0.475052	0.0282537
AAEL001243	0.432404	0.0564868
AAEL001244	0.333759	0.0074456
AAEL001245	0.0117357	0.984301
AAEL001246	0.0304459	0.938645
AAEL001247	-1.40979	0.0403875
AAEL001249	-0.880974	0.0270676
AAEL001250	0.130891	0.543523
AAEL001251	-0.468484	0.360652
AAEL001252	0.069535	0.687187
AAEL001254	0.553485	4.33e-08
AAEL001255	0.0869332	0.632455
AAEL001257	2.47149	1.12e-60
AAEL001260	0.0218225	0.961524
AAEL001261	1.04984	1.63e-10
AAEL001264	-0.281321	0.0802595
AAEL001266	-0.563848	4.19e-06
AAEL001269	-2.72237	2.57e-121
AAEL001270	0.0168188	0.942084
AAEL001271	-0.508906	0.00616066
AAEL001273	0.0168161	0.92731
AAEL001275	-0.20795	0.070305
AAEL001276	-0.34174	0.213138
AAEL001279	0.583982	8.77e-06
AAEL001281	0.679462	0.158566
AAEL001282	0.366582	0.32728
AAEL001283	-1.53867	1.18e-05
AAEL001284	-0.251161	0.624339
AAEL001287	-6.99355	3.64e-243
AAEL001289	1.82151	4.14e-31
AAEL001290	1.66524	2.08e-06
AAEL001293	0.0805863	0.806589
AAEL001294	-6.58335	3.05e-146
AAEL001295	-3.24518	2.17e-29
AAEL001296	0.20363	0.0927488
AAEL001297	0.811508	0.0329223
AAEL001298	-0.228175	0.647618
AAEL001299	1.88349	5.48e-47
AAEL001300	-0.0866404	0.701936
AAEL001301	-4.24188	5.93e-79
AAEL001304	-0.623382	1.87e-10
AAEL001305	-2.8248	9.91e-19
AAEL001306	-5.72685	2.89e-229
AAEL001307	-1.43524	4.45e-44
AAEL001308	-0.339863	0.159565
AAEL001313	-0.0521884	0.844625
AAEL001314	-0.164778	0.411905
AAEL001315	0.0292806	0.912174
AAEL001317	0.29743	0.0436978
AAEL001318	-0.557103	0.00110671
AAEL001319	-0.968382	0.00409175
AAEL001320	-1.6154	4.11e-30
AAEL001321	-0.167172	0.239731
AAEL001322	0.0696855	0.684096
AAEL001323	-4.7589	5.74e-157
AAEL001324	-0.629719	7.66e-05
AAEL001325	0.116779	0.737376
AAEL001326	-1.15795	6.51e-05
AAEL001328	0.976883	9.78e-13
AAEL001329	-0.659577	0.000237362
AAEL001330	-1.23872	5.18e-09
AAEL001331	0.607821	4.22e-06
AAEL001332	-0.176182	0.321047
AAEL001334	0.00625397	0.991105
AAEL001336	0.380022	0.00747279
AAEL001337	0.1409	0.614983
AAEL001338	-1.30354	2.49e-05
AAEL001339	-0.194727	0.168114
AAEL001341	0.0801337	0.624654
AAEL001343	1.83857	9.21e-25
AAEL001344	-0.103716	0.815801
AAEL001345	0.403952	0.687187
AAEL001346	3.77467	2.04e-39
AAEL001347	0.310714	0.688448
AAEL001348	-0.10053	0.873865
AAEL001349	0.239455	0.64527
AAEL001350	0.212225	0.253912
AAEL001351	-0.57873	0.000937886
AAEL001352	0.217642	0.0875502
AAEL001353	0.0734844	0.655585
AAEL001354	-0.303843	0.294262
AAEL001355	-0.420152	0.0108333
AAEL001356	0.370513	0.00185779
AAEL001357	0.152179	0.774053
AAEL001358	0.172476	0.570465
AAEL001359	0.781627	0.00785897
AAEL001360	-1.10366	5.17e-19
AAEL001361	-0.187754	0.219535
AAEL001363	0.280881	0.395655
AAEL001365	2.01389	4.53e-37
AAEL001366	0.0296556	0.955034
AAEL001367	0.145133	0.604816
AAEL001368	0.282261	0.0358419
AAEL001370	0.924576	0.000732636
AAEL001371	-0.241659	0.866086
AAEL001372	-0.333078	0.00397214
AAEL001373	0.905496	1.58e-06
AAEL001374	-1.08968	0.00251733
AAEL001376	-0.305561	0.694846
AAEL001378	-0.65487	5.6e-10
AAEL001379	0.444193	0.00052744
AAEL001380	0.371273	0.216837
AAEL001381	-0.657305	0.000173127
AAEL001383	-0.896702	0.0696874
AAEL001384	0.169088	0.650943
AAEL001385	-0.105908	0.716444
AAEL001386	0.156638	0.80077
AAEL001387	-0.59362	0.000562388
AAEL001389	0.0933461	0.561497
AAEL001391	-0.344592	0.0386319
AAEL001392	-4.04651	3.53e-124
AAEL001393	-0.151032	0.297179
AAEL001394	-0.492521	2.66e-05
AAEL001395	-0.0167	0.959252
AAEL001396	0.401353	0.0698347
AAEL001397	-0.303085	0.0239042
AAEL001398	0.761695	8e-14
AAEL001399	0.128186	0.658789
AAEL001403	0.424057	0.00239966
AAEL001404	-0.416543	0.0890224
AAEL001405	0.342231	0.0192879
AAEL001406	0.145668	0.28205
AAEL001407	-0.382115	0.00448807
AAEL001409	-0.437817	0.269818
AAEL001410	-0.0657796	0.800214
AAEL001411	0.661274	8.85e-09
AAEL001416	0.142607	0.41949
AAEL001419	-0.584954	0.19819
AAEL001421	-0.206632	0.0629492
AAEL001422	0.0189924	0.947907
AAEL001423	-0.505135	0.00497986
AAEL001424	-0.892111	3.22e-05
AAEL001425	0.016215	0.978498
AAEL001426	-0.0972563	0.722957
AAEL001428	0.421065	0.357257
AAEL001432	0.655006	4.86e-08
AAEL001433	-0.45395	0.0203996
AAEL001434	1.25356	3.19e-05
AAEL001435	2.52798	9.23e-45
AAEL001436	1.34138	1.86e-14
AAEL001437	1.18641	2.98e-17
AAEL001438	-0.0858796	0.841804
AAEL001439	-0.34217	0.101392
AAEL001440	-0.0903346	0.578769
AAEL001442	-0.502127	1.56e-05
AAEL001446	0.35996	0.00514879
AAEL001447	0.508181	6.79e-06
AAEL001448	-0.0890437	0.615601
AAEL001449	0.0648834	0.894483
AAEL001450	-0.426852	0.158981
AAEL001451	-0.159969	0.507731
AAEL001454	-0.0122927	0.959625
AAEL001455	0.0471205	0.862166
AAEL001457	-0.379517	0.0639486
AAEL001458	-0.413064	0.690422
AAEL001459	1.04736	2.77e-11
AAEL001462	0.101037	0.572426
AAEL001463	-0.156503	0.874923
AAEL001464	-1.67187	2.88e-10
AAEL001466	-1.34428	3.96e-07
AAEL001467	0.560817	1.93e-05
AAEL001468	-0.0665537	0.839619
AAEL001470	0.00570244	0.988894
AAEL001471	-0.0688194	0.700145
AAEL001472	-0.314025	0.038446
AAEL001473	-0.0971653	0.52033
AAEL001474	-0.705663	0.0921132
AAEL001475	0.263983	0.786631
AAEL001476	-1.19263	2.69e-29
AAEL001477	-0.564402	1.33e-08
AAEL001478	-1.64997	2.5e-22
AAEL001479	-0.810401	9.5e-13
AAEL001480	-0.912663	1.08e-20
AAEL001481	1.15536	3.48e-07
AAEL001482	-0.107042	0.730011
AAEL001483	-0.409903	0.348412
AAEL001484	0.00367728	0.9857
AAEL001490	-0.150969	0.549815
AAEL001491	0.616078	0.536089
AAEL001492	-1.68805	6.79e-17
AAEL001493	0.561669	0.738177
AAEL001494	4.26703	7.52e-198
AAEL001495	0.328054	0.0458818
AAEL001496	0.334728	0.00914192
AAEL001497	-0.291228	0.0541635
AAEL001498	1.30783	2.21e-12
AAEL001499	-2.30453	3.03e-25
AAEL001500	0.307412	0.0431049
AAEL001501	-0.61638	0.000147471
AAEL001503	-0.456441	0.000151752
AAEL001504	-1.18823	3.19e-37
AAEL001505	0.438584	0.00104831
AAEL001506	-0.529668	0.00342207
AAEL001507	-0.333933	0.00515335
AAEL001508	-1.21867	0.00158469
AAEL001509	-0.370085	0.470791
AAEL001511	1.41436	1.08e-32
AAEL001513	-0.382897	0.0929014
AAEL001514	-5.05635	6.4e-72
AAEL001515	-0.287333	0.33643
AAEL001516	0.236784	0.104326
AAEL001517	-0.695815	0.279814
AAEL001518	0.253094	0.185223
AAEL001520	0.584001	0.024685
AAEL001521	0.901422	0.0178935
AAEL001522	4.11655	6.9e-38
AAEL001523	0.466139	0.329809
AAEL001524	-0.546119	0.0913007
AAEL001525	-0.125047	0.521669
AAEL001526	0.297858	0.0258515
AAEL001527	0.440145	0.258668
AAEL001528	-0.637768	0.00813006
AAEL001529	0.426838	0.521859
AAEL001532	-0.0329818	0.856147
AAEL001533	0.271739	0.473915
AAEL001536	0.0285029	0.969983
AAEL001539	-0.634926	0.000207155
AAEL001540	-0.0661813	0.705857
AAEL001542	0.393059	0.196835
AAEL001544	-0.438176	0.727875
AAEL001545	-0.153344	0.841165
AAEL001546	-0.190202	0.217684
AAEL001547	0.247671	0.747769
AAEL001548	-2.26536	6.51e-31
AAEL001549	-0.762824	3e-11
AAEL001553	3.39175	1.12e-101
AAEL001554	-0.0631137	0.823945
AAEL001556	0.103386	0.678218
AAEL001557	0.105277	0.506019
AAEL001559	1.22739	0.476338
AAEL001561	-1.50543	2.92e-41
AAEL001562	-0.178003	0.40833
AAEL001563	0.108458	0.789024
AAEL001564	-2.06003	5.54e-77
AAEL001565	-1.42017	4.23e-16
AAEL001566	-0.297807	0.723199
AAEL001567	-0.23429	0.224781
AAEL001568	-0.849925	0.0113167
AAEL001569	-0.162631	0.181239
AAEL001570	0.803677	5.38e-15
AAEL001573	-0.38296	0.0253759
AAEL001574	0.690402	2.01e-09
AAEL001575	0.45956	0.550428
AAEL001576	0.0158269	0.947745
AAEL001578	0.547408	0.459851
AAEL001580	-0.186469	0.423579
AAEL001581	0.0875692	0.626381
AAEL001582	0.0531782	0.868028
AAEL001583	0.192217	0.18847
AAEL001584	3.69518	1.83e-133
AAEL001585	0.365193	0.436164
AAEL001586	-2.06456	4.25e-35
AAEL001587	0.373869	0.0084878
AAEL001588	-0.11013	0.550788
AAEL001591	-0.46451	0.470946
AAEL001592	0.44708	0.108943
AAEL001593	-0.249827	0.0348829
AAEL001594	0.440816	0.259317
AAEL001596	-0.06291	0.938936
AAEL001597	0.51445	0.0279157
AAEL001598	-0.765229	8.96e-08
AAEL001599	0.0231907	0.966418
AAEL001600	-0.0934664	0.81067
AAEL001604	0.705689	2.27e-09
AAEL001605	-0.109286	0.473392
AAEL001606	0.411276	0.0489814
AAEL001607	-0.89917	1.21e-05
AAEL001610	0.149946	0.769415
AAEL001612	-0.0438477	0.860828
AAEL001614	-0.174734	0.506233
AAEL001615	-0.630227	0.000494752
AAEL001616	-0.556918	6.43e-08
AAEL001618	-0.141392	0.380242
AAEL001619	-0.209203	0.381521
AAEL001622	0.240379	0.0990059
AAEL001623	-0.536213	6.31e-08
AAEL001624	-0.562557	0.451089
AAEL001625	-2.58148	9.46e-74
AAEL001626	-0.478381	0.0105105
AAEL001627	1.23831	2.85e-19
AAEL001628	-1.00449	0.22105
AAEL001629	-1.00242	8.41e-08
AAEL001631	-0.183518	0.664459
AAEL001632	2.11584	8.86e-29
AAEL001635	0.178291	0.686393
AAEL001636	0.120952	0.438606
AAEL001637	2.41186	0.0300034
AAEL001638	-0.604856	7.01e-06
AAEL001639	0.0873973	0.653542
AAEL001640	3.14517	9.3e-17
AAEL001641	-0.0420373	0.926437
AAEL001642	-1.85356	1.83e-26
AAEL001643	0.183483	0.801791
AAEL001644	-0.288428	0.725099
AAEL001645	-0.160321	0.509236
AAEL001646	-2.82655	2.63e-28
AAEL001647	0.176492	0.233746
AAEL001648	-0.693923	1.03e-10
AAEL001649	0.0812781	0.638156
AAEL001651	-0.138771	0.443503
AAEL001652	0.562821	0.300782
AAEL001653	-0.608651	0.0524419
AAEL001655	0.476004	0.00329976
AAEL001656	-1.3768	7.74e-26
AAEL001657	0.0575679	0.820652
AAEL001658	0.195202	0.476432
AAEL001659	-0.121458	0.563868
AAEL001662	-0.286919	0.0535872
AAEL001664	-0.0762521	0.747647
AAEL001666	1.15359	0.234232
AAEL001668	0.24326	0.0315867
AAEL001671	3.63335	1.6e-139
AAEL001672	0.685434	2.94e-05
AAEL001673	-0.66523	0.000282828
AAEL001675	3.55794	3.51e-132
AAEL001676	0.13109	0.896467
AAEL001677	0.648741	0.000533843
AAEL001678	1.05703	0.139643
AAEL001680	-0.524588	0.0094059
AAEL001682	-0.403016	0.0263219
AAEL001683	0.676912	1.9e-05
AAEL001684	0.596649	0.0509201
AAEL001685	2.40587	2.54e-50
AAEL001687	-1.81073	0.000291878
AAEL001688	0.414985	0.00486361
AAEL001689	-0.55558	0.00696365
AAEL001694	2.96675	1.44e-14
AAEL001695	-0.3343	0.0329553
AAEL001696	0.259627	0.509403
AAEL001698	0.11363	0.483388
AAEL001699	-0.885624	1.99e-12
AAEL001702	-1.3977	2.88e-16
AAEL001704	0.938096	1.86e-11
AAEL001707	0.789993	1.72e-05
AAEL001708	2.99421	2.09e-60
AAEL001709	-0.051444	0.760385
AAEL001710	0.565143	0.10519
AAEL001711	0.0373571	0.928627
AAEL001715	-0.476564	4.89e-06
AAEL001716	0.0238088	0.90294
AAEL001717	0.357051	0.210015
AAEL001719	-0.896695	1.86e-17
AAEL001720	-0.0971687	0.894726
AAEL001721	0.736747	0.016383
AAEL001722	-0.409911	0.00962728
AAEL001723	0.669865	0.092113
AAEL001724	0.217126	0.565754
AAEL001725	-0.315261	0.0540411
AAEL001727	-0.689579	0.261032
AAEL001729	-0.0195376	0.948685
AAEL001730	-0.542065	0.291353
AAEL001731	-0.164456	0.488047
AAEL001734	0.189088	0.806825
AAEL001736	4.39506	0.0186334
AAEL001738	-1.40736	1.22e-09
AAEL001739	0.141066	0.625761
AAEL001742	0.13672	0.362026
AAEL001744	-0.224366	0.170566
AAEL001745	0.869441	1.15e-14
AAEL001746	-0.521489	5.18e-05
AAEL001748	-0.288715	0.469464
AAEL001749	0.838601	6.65e-11
AAEL001751	-0.565462	6.52e-06
AAEL001752	-0.0388611	0.838989
AAEL001754	-1.06196	0.0428592
AAEL001755	0.337871	0.781667
AAEL001756	-0.270415	0.17248
AAEL001757	0.800378	0.0178722
AAEL001759	-0.354941	0.00114236
AAEL001760	-0.634167	0.00126654
AAEL001761	-1.98007	2.49e-31
AAEL001764	0.119812	0.708673
AAEL001765	0.0702195	0.74967
AAEL001766	0.847874	6.09e-08
AAEL001767	-0.434917	0.000113491
AAEL001769	0.0312167	0.877853
AAEL001770	0.0359361	0.830719
AAEL001775	0.151033	0.808842
AAEL001776	-0.126924	0.90086
AAEL001777	0.500219	0.33643
AAEL001778	-0.250955	0.304048
AAEL001779	0.211042	0.125892
AAEL001780	0.367953	0.00417498
AAEL001782	0.301137	0.0827224
AAEL001785	-0.476196	0.103196
AAEL001787	-0.376608	0.0143251
AAEL001789	-0.112113	0.889355
AAEL001791	0.296591	0.00799674
AAEL001792	-2.85385	2.63e-12
AAEL001795	-0.901849	1.13e-08
AAEL001796	-0.0198402	0.933396
AAEL001797	-0.0840652	0.752249
AAEL001798	-0.644766	7.39e-10
AAEL001799	0.518742	0.000156011
AAEL001800	-0.735946	3.73e-07
AAEL001802	-1.0911	5.96e-23
AAEL001803	0.241021	0.0591231
AAEL001805	0.0814795	0.867107
AAEL001808	0.465869	8.31e-05
AAEL001809	1.95317	9.46e-23
AAEL001810	-0.301749	0.00863251
AAEL001812	0.978141	2.6e-13
AAEL001813	0.185777	0.239162
AAEL001815	0.527632	5.06e-06
AAEL001817	-0.238495	0.285469
AAEL001818	-0.353724	0.479648
AAEL001819	-0.841819	0.000121058
AAEL001820	-0.876859	0.00998825
AAEL001822	1.1028	1.35e-12
AAEL001824	-0.11007	0.573334
AAEL001827	-0.0634627	0.852727
AAEL001830	-0.206694	0.197621
AAEL001831	-0.398735	0.0129539
AAEL001832	1.26651	5.3e-25
AAEL001833	-0.933017	0.000102987
AAEL001835	0.0438476	0.958832
AAEL001836	-0.0302449	0.962118
AAEL001838	0.0232907	0.933377
AAEL001840	-3.28778	5.31e-66
AAEL001843	-0.0069274	0.99155
AAEL001845	0.0420265	0.854417
AAEL001846	0.57039	0.569198
AAEL001847	-0.964829	1.67e-22
AAEL001848	-0.239564	0.0979299
AAEL001850	0.683336	1.09e-06
AAEL001851	0.891761	1.7e-14
AAEL001852	0.265968	0.364812
AAEL001853	-0.428243	0.000139149
AAEL001854	-0.270812	0.344746
AAEL001856	-0.118347	0.650057
AAEL001857	0.712813	0.285736
AAEL001858	-0.140985	0.578485
AAEL001859	-0.269567	0.0505273
AAEL001860	0.0591676	0.837437
AAEL001861	-0.303931	0.0123284
AAEL001863	-0.453683	0.183969
AAEL001864	-0.963823	4.84e-23
AAEL001865	-0.746996	8.93e-11
AAEL001867	-0.766051	0.020883
AAEL001868	-0.0902684	0.902404
AAEL001869	-0.835869	7.84e-16
AAEL001870	-1.57187	3.19e-06
AAEL001871	0.0625619	0.903946
AAEL001872	-0.402643	0.000282579
AAEL001874	-0.04422	0.83752
AAEL001875	0.134069	0.531199
AAEL001876	-0.0727895	0.739938
AAEL001878	-0.172507	0.504689
AAEL001879	-0.159987	0.883397
AAEL001881	0.128204	0.773553
AAEL001883	-0.450963	0.00169288
AAEL001884	-1.76179	1.38e-10
AAEL001886	0.197647	0.586094
AAEL001887	-0.431948	0.000329286
AAEL001888	-0.394519	0.0414119
AAEL001890	-0.311443	0.342027
AAEL001891	-0.206349	0.286782
AAEL001893	0.0438779	0.82431
AAEL001894	-1.15603	6.71e-10
AAEL001896	-0.519019	3.57e-07
AAEL001897	0.936911	5.87e-18
AAEL001898	-1.28356	7.77e-41
AAEL001899	-1.35629	4.37e-05
AAEL001900	-1.31912	0.0120852
AAEL001901	0.510992	0.625542
AAEL001903	-0.152888	0.777821
AAEL001904	0.194248	0.143375
AAEL001905	0.614078	4.64e-05
AAEL001906	0.139179	0.279804
AAEL001909	-0.551952	0.00051956
AAEL001910	-0.579955	2.58e-07
AAEL001912	0.547801	0.00195452
AAEL001913	0.425916	0.00021653
AAEL001914	0.717114	4.76e-11
AAEL001915	-1.66551	6.47e-37
AAEL001916	0.0812964	0.60018
AAEL001918	0.220729	0.139432
AAEL001919	0.066497	0.686769
AAEL001920	0.456658	0.0258647
AAEL001921	0.779632	3.12e-06
AAEL001922	0.0385817	0.930916
AAEL001925	-0.733082	0.254157
AAEL001928	0	1
AAEL001929	0.330978	0.625761
AAEL001930	-0.112354	0.521932
AAEL001932	0.0231414	0.977436
AAEL001934	-0.0406193	0.946309
AAEL001935	0.166134	0.328604
AAEL001936	0.546828	0.00597704
AAEL001937	0.527622	0.0389157
AAEL001938	-5.34521	6.43e-88
AAEL001939	-0.334934	0.00368437
AAEL001940	-0.267507	0.0431367
AAEL001941	5.78496	0.0280246
AAEL001942	-0.0557701	0.875115
AAEL001943	-0.402399	0.0756981
AAEL001945	0.408769	0.0571872
AAEL001946	-0.338585	0.0321744
AAEL001948	0.925094	2.12e-07
AAEL001949	0.200243	0.763009
AAEL001950	0.00246937	0.993849
AAEL001952	-0.0522958	0.776997
AAEL001954	0.84999	1.01e-08
AAEL001955	-0.149951	0.674969
AAEL001957	-0.494565	0.0470234
AAEL001958	0.244784	0.769282
AAEL001959	0.596259	8.62e-07
AAEL001962	0.256717	0.146236
AAEL001963	1.34981	4.24e-16
AAEL001964	0.016805	0.980813
AAEL001968	-0.779477	3.29e-10
AAEL001969	2.32088	1.89e-14
AAEL001970	0.829485	0.0142568
AAEL001971	0.0789213	0.785648
AAEL001972	0.218179	0.318251
AAEL001973	-0.304568	0.657972
AAEL001974	-0.745881	1.33e-05
AAEL001975	0.548279	0.685566
AAEL001977	0.0714166	0.693623
AAEL001978	-0.29703	0.447917
AAEL001979	-0.406867	6.73e-05
AAEL001981	0.967576	1.73e-06
AAEL001982	-0.351866	0.494697
AAEL001983	0.128225	0.657711
AAEL001984	0.0573744	0.848145
AAEL001986	0.42037	0.0464867
AAEL001992	0.701622	0.0879915
AAEL001996	-0.086203	0.665294
AAEL001997	-0.650477	2.75e-05
AAEL001998	-0.56602	0.00012719
AAEL002002	-0.599896	9.95e-05
AAEL002004	1.72472	2.4e-21
AAEL002006	-0.257694	0.251946
AAEL002008	0.137904	0.603793
AAEL002009	-0.334695	0.0336378
AAEL002010	-0.912981	3.08e-05
AAEL002012	0.169023	0.351996
AAEL002013	-0.0946632	0.840416
AAEL002014	-0.594683	2.3e-06
AAEL002016	-0.31271	0.0224458
AAEL002018	-0.470718	0.165583
AAEL002019	-1.1606	3.09e-11
AAEL002020	-0.476829	0.458173
AAEL002023	-0.750007	9.82e-08
AAEL002025	-0.646636	0.000243637
AAEL002033	0.0301271	0.968293
AAEL002036	-0.0923626	0.733294
AAEL002037	0.473765	0.00484521
AAEL002039	1.03721	4.08e-14
AAEL002043	-0.563479	0.62352
AAEL002047	-0.0724593	0.678029
AAEL002048	-0.220762	0.146739
AAEL002050	0.525587	0.113754
AAEL002051	-0.400018	0.571821
AAEL002054	-0.1398	0.760688
AAEL002055	-1.12549	1.17e-19
AAEL002056	-0.968207	1.66e-06
AAEL002058	0.689246	0.408715
AAEL002059	-0.206157	0.445978
AAEL002060	-0.460943	0.000154874
AAEL002061	0.0267346	0.889355
AAEL002062	1.60731	2.68e-17
AAEL002065	-0.436259	0.00151963
AAEL002066	-0.821026	0.427387
AAEL002067	0.572401	0.319751
AAEL002068	-0.555346	0.000495491
AAEL002069	-0.893454	6.27e-07
AAEL002070	-0.343107	0.118867
AAEL002071	-0.397713	0.0618277
AAEL002072	-1.65362	1.59e-07
AAEL002074	-0.352774	0.117032
AAEL002077	-0.18397	0.157524
AAEL002078	0.135167	0.599814
AAEL002079	-0.140316	0.716628
AAEL002080	0.32094	0.317101
AAEL002081	-0.800304	1.04e-13
AAEL002082	-0.274458	0.0202881
AAEL002083	0.187388	0.167716
AAEL002084	-0.137255	0.426585
AAEL002088	-0.540391	3.7e-05
AAEL002089	0.0650966	0.800962
AAEL002090	0.150117	0.776446
AAEL002091	0.187411	0.218886
AAEL002093	0.476546	0.195856
AAEL002094	1.00258	0.0368739
AAEL002096	1.37134	0.0669161
AAEL002097	0.211692	0.351996
AAEL002098	-0.0666279	0.767526
AAEL002100	-0.0421419	0.925271
AAEL002101	0.125861	0.405174
AAEL002102	0.348774	0.100767
AAEL002103	-0.437551	0.253089
AAEL002104	0.172652	0.653573
AAEL002105	-0.280033	0.697081
AAEL002106	-0.558044	0.0736304
AAEL002107	-1.73488	2.6e-44
AAEL002108	-0.84865	1.33e-05
AAEL002110	3.08295	3.48e-48
AAEL002111	1.62431	0.0218635
AAEL002112	0.659071	7.57e-06
AAEL002113	-0.550639	0.109785
AAEL002114	0.103696	0.621092
AAEL002115	0.530006	7.33e-05
AAEL002116	0.110786	0.865231
AAEL002117	-1.56078	0.0154835
AAEL002118	-0.333716	0.0018938
AAEL002119	-0.0641563	0.740797
AAEL002120	-0.491574	0.780828
AAEL002121	0.138791	0.437219
AAEL002122	0.110708	0.64579
AAEL002123	0.176797	0.309758
AAEL002124	-3.77155	4.31e-53
AAEL002125	0.520847	1.37e-05
AAEL002126	3.02269	1.02e-99
AAEL002127	-0.375535	0.0872524
AAEL002129	0.0304389	0.933991
AAEL002130	-0.0641651	0.727886
AAEL002132	3.99511	1.88e-45
AAEL002133	-0.928867	8.77e-11
AAEL002134	0.883129	2.58e-12
AAEL002135	-0.150851	0.510372
AAEL002136	0.0860082	0.917466
AAEL002137	0.109063	0.454161
AAEL002139	-0.00875483	0.974188
AAEL002141	-0.744804	0.00974138
AAEL002142	-0.4319	0.221246
AAEL002143	-0.0100919	0.993921
AAEL002144	-0.0500074	0.867221
AAEL002145	0.1969	0.190837
AAEL002146	-0.290845	0.509348
AAEL002148	-0.626909	0.000888652
AAEL002151	0.00549365	0.989513
AAEL002152	0.405627	0.00322916
AAEL002153	-0.127059	0.826583
AAEL002154	-0.0656641	0.761078
AAEL002155	-0.103585	0.553828
AAEL002157	-0.2498	0.278051
AAEL002158	-0.391542	0.661234
AAEL002160	-0.302686	0.00642392
AAEL002161	-1.22816	3.95e-12
AAEL002162	0.363052	0.335185
AAEL002163	-0.44147	3.35e-05
AAEL002164	0.0939613	0.795491
AAEL002165	-0.547412	0.0165501
AAEL002166	-0.180437	0.14212
AAEL002168	-0.213286	0.207727
AAEL002169	-0.376248	0.177721
AAEL002170	0.0803649	0.813546
AAEL002171	0.839998	1.46e-06
AAEL002173	0.281161	0.674335
AAEL002174	0.175846	0.875931
AAEL002175	-0.0351039	0.845765
AAEL002179	-0.52278	0.0581741
AAEL002182	-0.653037	2.43e-08
AAEL002183	0.455374	0.000407141
AAEL002184	0.134015	0.44344
AAEL002186	-0.702138	2.06e-06
AAEL002190	-1.02506	1.58e-15
AAEL002194	-1.19582	6.33e-12
AAEL002195	-0.239964	0.379018
AAEL002197	0.845438	0.0277497
AAEL002198	-0.0718541	0.787445
AAEL002203	-0.441693	0.0464867
AAEL002205	-0.253657	0.372808
AAEL002206	0.537333	1.02e-05
AAEL002207	-0.112095	0.673353
AAEL002209	0.0216106	0.925323
AAEL002213	1.38914	4.59e-14
AAEL002214	0.213613	0.185266
AAEL002215	0.0982683	0.578429
AAEL002216	-0.137847	0.460055
AAEL002217	2.06526	2.23e-19
AAEL002219	-0.0040354	0.990046
AAEL002221	-0.0925463	0.715677
AAEL002222	-0.276478	0.168816
AAEL002225	0.388025	0.274394
AAEL002226	-0.0418706	0.844553
AAEL002230	0.494903	0.0041142
AAEL002231	-1.35495	7.95e-14
AAEL002232	-1.59714	4.78e-08
AAEL002234	0.318834	0.496851
AAEL002235	-1.00143	1.19e-16
AAEL002236	0.125654	0.736692
AAEL002238	0.0372407	0.871644
AAEL002240	0.245088	0.119635
AAEL002243	-2.45354	1.7e-28
AAEL002244	0.115979	0.806047
AAEL002245	-2.89326	6.94e-45
AAEL002246	0.28689	0.538025
AAEL002247	1.21146	0.162585
AAEL002248	-0.175162	0.39445
AAEL002249	-0.964656	1.59e-15
AAEL002250	-0.409954	0.352327
AAEL002251	1.13231	9.33e-18
AAEL002253	0.461603	0.0285484
AAEL002254	-0.574937	0.559654
AAEL002255	-1.84574	0.000235644
AAEL002256	0.688588	0.00277301
AAEL002257	-0.187177	0.813546
AAEL002258	0.255086	0.13225
AAEL002259	-0.379458	0.723771
AAEL002260	-0.563199	2.76e-06
AAEL002261	-2.08872	5.38e-77
AAEL002262	0.981433	0.141463
AAEL002265	-0.325328	0.29893
AAEL002268	0.534621	0.0505431
AAEL002269	-3.13401	3.35e-111
AAEL002270	0.758265	0.442962
AAEL002271	-0.0779681	0.673849
AAEL002272	0.741686	4.1e-11
AAEL002273	-2.80226	4.51e-05
AAEL002276	-1.41428	1.73e-06
AAEL002277	-0.522056	7.59e-05
AAEL002280	0.116871	0.536722
AAEL002282	0.205911	0.434496
AAEL002284	0.266353	0.421396
AAEL002286	0.368384	0.0255087
AAEL002287	-0.0357849	0.854089
AAEL002290	-0.199663	0.243598
AAEL002291	4.25062	1.03e-89
AAEL002292	-1.07846	1.11e-06
AAEL002293	-0.47069	0.0885857
AAEL002294	0.450191	0.0297665
AAEL002295	1.00895	0.00954449
AAEL002296	-0.0570425	0.765246
AAEL002298	0.100566	0.78266
AAEL002299	0.866825	5.86e-12
AAEL002301	-1.46686	1.99e-15
AAEL002302	-1.41276	1.71e-13
AAEL002303	0.491613	0.167045
AAEL002304	-0.0767139	0.758824
AAEL002305	-1.9261	1.6e-07
AAEL002306	0.144205	0.370117
AAEL002307	-0.735968	1.08e-07
AAEL002308	-1.12355	8.1e-12
AAEL002309	-0.364203	0.0430844
AAEL002310	0.011144	0.991366
AAEL002311	-0.898158	0.0115231
AAEL002312	-0.279356	0.119073
AAEL002316	0.259777	0.699742
AAEL002317	0.00678092	0.989706
AAEL002318	0.851852	6.9e-12
AAEL002319	-0.144304	0.451546
AAEL002320	0.0606322	0.955055
AAEL002321	0.0204832	0.964034
AAEL002322	-0.858304	1.48e-10
AAEL002323	-0.21379	0.396652
AAEL002329	-0.0533381	0.874787
AAEL002330	0.82295	0.0968952
AAEL002334	-0.193455	0.0989183
AAEL002335	0.417486	0.000644709
AAEL002336	0.8658	0.00266249
AAEL002337	0.198777	0.209088
AAEL002339	-0.168616	0.524476
AAEL002340	0.149021	0.475518
AAEL002341	-0.21976	0.423838
AAEL002343	0.204388	0.790275
AAEL002345	-0.476338	0.0572257
AAEL002346	0.55889	2.37e-09
AAEL002348	-1.08305	2.25e-15
AAEL002349	-2.05318	2.72e-54
AAEL002351	0.192293	0.208056
AAEL002352	0.386292	0.0389152
AAEL002354	0.979089	4.85e-08
AAEL002355	0.883996	0.0594849
AAEL002357	0.0312991	0.889877
AAEL002358	1.25428	0.0502612
AAEL002359	0.330251	0.00628953
AAEL002362	-0.235728	0.41624
AAEL002363	-0.152619	0.489485
AAEL002365	-0.191376	0.760902
AAEL002366	0.282183	0.350951
AAEL002367	-0.836457	0.000354198
AAEL002369	0.0492865	0.80532
AAEL002370	-0.510622	6.65e-06
AAEL002371	-0.0508648	0.896969
AAEL002372	-0.277129	0.0340376
AAEL002374	0.53752	3.02e-06
AAEL002375	-0.234212	0.482243
AAEL002376	-0.0590875	0.779353
AAEL002377	0.220523	0.123628
AAEL002380	0.461609	0.530746
AAEL002381	0.877845	6.97e-10
AAEL002382	0.331962	0.0409551
AAEL002384	0.461288	0.009952
AAEL002385	-3.95035	1.96e-20
AAEL002386	0.0139296	0.954196
AAEL002387	0.256437	0.135399
AAEL002389	0.237466	0.264876
AAEL002390	0.7332	6.48e-06
AAEL002392	0.000498474	0.998667
AAEL002394	-0.258993	0.584913
AAEL002395	0.37714	0.0314745
AAEL002397	-0.461457	0.389149
AAEL002398	0.369176	0.578712
AAEL002399	-1.09233	3.74e-26
AAEL002401	0.00193749	0.993849
AAEL002402	0.672984	0.000177108
AAEL002403	-1.34516	0.00013551
AAEL002404	0.233662	0.132529
AAEL002406	0.825502	0.0121778
AAEL002407	-0.138225	0.351291
AAEL002408	-0.0832117	0.748877
AAEL002409	0.217667	0.499617
AAEL002411	-0.887685	4.14e-14
AAEL002412	-0.644853	2.28e-08
AAEL002413	-0.966762	0.251067
AAEL002415	0.0355907	0.878629
AAEL002416	-0.048613	0.787305
AAEL002417	-0.193485	0.185981
AAEL002418	-0.405979	0.0976551
AAEL002419	0.329602	0.0141301
AAEL002420	0.182853	0.150081
AAEL002421	-0.515089	0.544946
AAEL002422	0.144191	0.845154
AAEL002423	0.444431	0.0333625
AAEL002426	-0.0323081	0.898474
AAEL002427	0.349695	0.0160004
AAEL002430	-0.156669	0.447936
AAEL002432	-1.39157	1.27e-16
AAEL002433	-2.37766	1.32e-41
AAEL002434	0.17835	0.871312
AAEL002435	0.53205	5.18e-06
AAEL002436	-0.517228	7.32e-06
AAEL002437	-0.168746	0.275271
AAEL002438	0.872826	3.76e-05
AAEL002439	1.08535	2.29e-05
AAEL002440	-3.13156	4.2e-10
AAEL002442	0.604954	0.391064
AAEL002443	0.0628868	0.968788
AAEL002444	0.254327	0.603793
AAEL002446	-0.183052	0.290814
AAEL002447	-1.78957	0.0401208
AAEL002448	0.49839	0.00150007
AAEL002449	0.889016	1.02e-05
AAEL002450	0.282689	0.0743294
AAEL002451	0.608034	0.000204369
AAEL002452	-1.03186	0.00107985
AAEL002455	-0.487486	0.00307327
AAEL002456	0.419486	0.0175933
AAEL002457	-1.24439	8.36e-07
AAEL002458	-1.52385	0.0248034
AAEL002459	0.565882	0.00158221
AAEL002461	-0.0750341	0.854832
AAEL002462	-0.793259	0.0138579
AAEL002463	0.23624	0.878505
AAEL002464	-1.07898	1.12e-17
AAEL002465	-0.364461	0.00280802
AAEL002468	-2.29185	2.56e-52
AAEL002469	-0.489441	1.06e-06
AAEL002470	0.889427	0.0238152
AAEL002471	0.664605	1.22e-06
AAEL002473	0.0889888	0.886471
AAEL002474	1.2359	1.89e-18
AAEL002475	0.214505	0.133501
AAEL002478	-0.106108	0.723875
AAEL002480	-0.016945	0.939917
AAEL002483	-0.0419946	0.850448
AAEL002484	-1.57276	0.00466614
AAEL002486	-0.762667	0.00177199
AAEL002487	-0.751431	3.54e-05
AAEL002488	0.365533	0.0088738
AAEL002489	-0.734268	0.00399858
AAEL002493	-0.246865	0.500916
AAEL002496	0.772232	0.380342
AAEL002498	0.356527	0.0349935
AAEL002499	0.273664	0.117236
AAEL002500	-0.436768	0.311818
AAEL002501	-0.0148716	0.937974
AAEL002502	0.0527663	0.857498
AAEL002503	0.575785	0.00215951
AAEL002504	-0.675041	1.18e-11
AAEL002508	-0.100487	0.527491
AAEL002509	1.54603	0.230992
AAEL002510	-1.01084	1.67e-16
AAEL002511	-0.158374	0.458616
AAEL002512	0.464341	0.00129377
AAEL002513	3.17103	5.13e-89
AAEL002514	-0.00243914	0.992923
AAEL002516	0.430036	0.651982
AAEL002518	0.213873	0.798225
AAEL002520	-0.609179	0.0323539
AAEL002521	-0.130519	0.873499
AAEL002522	0.370555	0.240264
AAEL002523	-0.668365	6.1e-05
AAEL002524	-0.390437	0.399778
AAEL002525	-1.13117	1.47e-22
AAEL002526	-1.07455	6.65e-14
AAEL002527	-1.19605	1.07e-24
AAEL002528	-0.638148	0.00248882
AAEL002529	-0.131781	0.717289
AAEL002530	-1.0596	0.32699
AAEL002531	-0.142939	0.769227
AAEL002532	0.23611	0.0789012
AAEL002533	-0.31105	0.373962
AAEL002534	-0.366648	0.000345081
AAEL002536	-0.545338	3.14e-05
AAEL002537	4.38826	4.68e-106
AAEL002538	0.342518	0.0112742
AAEL002539	-0.302426	0.0118618
AAEL002540	-0.244131	0.115247
AAEL002542	-0.14087	0.350013
AAEL002543	-1.60841	7.82e-07
AAEL002544	-1.39772	4.93e-19
AAEL002545	-0.410718	0.49104
AAEL002546	-0.273082	0.0834781
AAEL002547	-0.393778	0.00353234
AAEL002548	0.100912	0.57354
AAEL002549	-0.517051	0.222053
AAEL002550	-0.419398	0.000286713
AAEL002551	0.32453	0.0510436
AAEL002553	3.33515	4.7e-12
AAEL002554	0.552345	0.143035
AAEL002555	-1.07327	0.00133615
AAEL002556	-0.618338	0.00415002
AAEL002557	-0.878091	3.71e-19
AAEL002558	-0.425187	0.49118
AAEL002559	0.516758	1.77e-05
AAEL002560	-1.02461	4.98e-06
AAEL002562	-0.136695	0.856212
AAEL002563	-0.15432	0.407655
AAEL002565	-0.277206	0.0597696
AAEL002566	4.49042	2.02e-50
AAEL002567	3.50463	3.11e-133
AAEL002568	1.60281	0.00119454
AAEL002569	-0.116954	0.815308
AAEL002571	0.409225	0.0148657
AAEL002572	-0.819756	1.1e-13
AAEL002574	-2.40789	3.09e-25
AAEL002575	0.00390341	0.997374
AAEL002576	-1.13725	5.84e-05
AAEL002578	-0.0668842	0.785097
AAEL002579	-0.807494	0.0762106
AAEL002581	-0.132674	0.59516
AAEL002582	-0.153591	0.744572
AAEL002583	1.0461	6.84e-23
AAEL002586	1.17817	0.132873
AAEL002587	-6.25052	9.14e-189
AAEL002588	-4.1761	1.23e-44
AAEL002590	-1.49565	8.48e-22
AAEL002592	-0.535194	0.370296
AAEL002593	-0.433539	0.000401187
AAEL002594	0.665944	4.21e-10
AAEL002595	0.0692152	0.732101
AAEL002597	-0.0195917	0.93275
AAEL002598	2.39797	5.86e-11
AAEL002599	0.523829	0.110932
AAEL002600	-1.03856	6.23e-05
AAEL002601	-0.96246	8.8e-07
AAEL002607	0.49607	6.87e-05
AAEL002608	-0.446694	0.256109
AAEL002611	-4.19462	1.11e-35
AAEL002612	-4.16219	2.52e-46
AAEL002613	-3.03013	7.87e-62
AAEL002614	0.0376797	0.900957
AAEL002615	1.13312	9.04e-08
AAEL002616	0.164093	0.586478
AAEL002618	3.65205	1.16e-31
AAEL002621	-0.112242	0.520401
AAEL002622	0.120397	0.628864
AAEL002624	-0.261656	0.137285
AAEL002625	-3.28382	4.53e-58
AAEL002627	-4.76732	1.21e-115
AAEL002628	0.771385	2.16e-10
AAEL002629	0.000865929	0.997555
AAEL002630	-1.13567	6.53e-07
AAEL002632	-0.61382	0.00168398
AAEL002636	-0.52669	0.0057043
AAEL002637	1.30058	3.02e-06
AAEL002638	-2.09726	0.0193684
AAEL002639	-0.135566	0.335628
AAEL002640	0.120345	0.61803
AAEL002641	0.171744	0.861733
AAEL002642	-0.0759674	0.925325
AAEL002644	-0.381628	0.111636
AAEL002645	-0.434385	0.000217931
AAEL002646	-0.258423	0.0213787
AAEL002647	-0.0806563	0.838269
AAEL002651	0.128681	0.526026
AAEL002652	-0.556637	0.00914433
AAEL002653	0.200799	0.143554
AAEL002657	-2.96309	5.89e-57
AAEL002658	0.455795	0.603811
AAEL002659	0.0186525	0.94651
AAEL002660	0.30711	0.00563682
AAEL002662	2.41406	2.06e-30
AAEL002663	0.00765392	0.975833
AAEL002665	-1.10739	8.27e-07
AAEL002668	-0.398312	0.335194
AAEL002669	-1.35494	5.22e-27
AAEL002672	-0.120702	0.648168
AAEL002673	1.85841	4.72e-45
AAEL002675	-0.962369	3.42e-16
AAEL002676	0.894486	0.173221
AAEL002678	0.138592	0.451138
AAEL002680	-0.010256	0.972839
AAEL002682	-3.87121	1.5e-46
AAEL002684	0.367683	0.00566313
AAEL002687	0.8551	1.78e-16
AAEL002688	-0.0785156	0.654611
AAEL002690	0.298703	0.343263
AAEL002691	0.384159	0.0014001
AAEL002692	-0.0719192	0.730054
AAEL002694	-0.0302189	0.892659
AAEL002698	-0.635684	8.72e-10
AAEL002699	3.02624	8.38e-48
AAEL002700	-0.212861	0.12164
AAEL002701	-0.290777	0.154875
AAEL002703	-0.525425	0.175416
AAEL002705	-0.600842	8.65e-08
AAEL002706	0.639175	0.0158409
AAEL002709	-0.920691	1.17e-06
AAEL002711	-0.146883	0.622762
AAEL002712	0.642497	0.224552
AAEL002713	4.78701	1.79e-22
AAEL002714	-0.0505279	0.860918
AAEL002716	-0.501442	0.148429
AAEL002718	1.11825	6.43e-25
AAEL002719	-0.370703	0.128905
AAEL002720	1.65799	1.45e-24
AAEL002721	0.336574	0.00410944
AAEL002723	-0.879184	7.13e-08
AAEL002724	-0.324891	0.586056
AAEL002725	0.404211	0.0870027
AAEL002727	-0.567445	0.151103
AAEL002728	-0.429669	0.000322618
AAEL002729	0.218278	0.168861
AAEL002731	-0.973398	0.0127495
AAEL002733	-0.792512	0.0110616
AAEL002735	-0.270648	0.105045
AAEL002736	3.24615	1.09e-143
AAEL002740	0.477695	0.00196485
AAEL002741	-0.429961	0.624576
AAEL002742	0.225467	0.810297
AAEL002750	-0.0619399	0.848357
AAEL002751	0.113572	0.494449
AAEL002752	0.341278	0.166823
AAEL002754	0.466805	0.000919254
AAEL002756	-0.601653	0.0001514
AAEL002758	-0.0569664	0.864422
AAEL002759	-0.540515	7.98e-07
AAEL002760	-0.539384	0.00026452
AAEL002761	-0.428198	8.38e-05
AAEL002764	-1.01943	2.33e-16
AAEL002765	0.0761432	0.841165
AAEL002766	-0.238732	0.444201
AAEL002767	0.307804	0.307975
AAEL002769	0.602112	1.01e-05
AAEL002770	-0.0683389	0.888792
AAEL002771	0.619027	3.27e-07
AAEL002772	0.343067	0.063213
AAEL002774	0.547631	3.08e-07
AAEL002775	0.816063	0.000264587
AAEL002776	-0.716504	3.99e-09
AAEL002777	-0.156862	0.612838
AAEL002780	3.53625	2.24e-13
AAEL002781	-0.143274	0.685143
AAEL002782	-0.192733	0.565298
AAEL002783	-0.566831	0.000401187
AAEL002784	-1.14507	3.3e-20
AAEL002785	0.0336039	0.948685
AAEL002786	-0.263466	0.535549
AAEL002787	0.158912	0.723525
AAEL002788	0.387488	0.00768436
AAEL002789	0.0816501	0.71191
AAEL002790	0.121489	0.723826
AAEL002791	-0.289093	0.0272258
AAEL002793	0.32466	0.118509
AAEL002794	-5.21593	2.99e-38
AAEL002795	-0.15286	0.765246
AAEL002796	-1.5031	2.92e-19
AAEL002797	-0.793273	2.98e-09
AAEL002798	0.109746	0.612195
AAEL002800	-0.225065	0.271809
AAEL002801	0.0287476	0.957
AAEL002802	-0.637156	7.79e-07
AAEL002803	0.393642	0.00343209
AAEL002804	0.314031	0.0991987
AAEL002805	0.160527	0.358399
AAEL002806	-0.463554	0.550814
AAEL002808	-1.1443	1.02e-10
AAEL002809	-0.0157857	0.972396
AAEL002810	0.126804	0.579587
AAEL002811	-1.61051	0.0922716
AAEL002812	-0.101299	0.834789
AAEL002813	-0.541529	2.64e-06
AAEL002814	-1.02278	1.92e-09
AAEL002815	-0.114017	0.418348
AAEL002817	-0.903193	3.55e-13
AAEL002818	0.310926	0.0165385
AAEL002819	-0.18173	0.491981
AAEL002820	0.61844	0.000195299
AAEL002822	-0.0206118	0.961003
AAEL002823	-0.195536	0.176533
AAEL002824	0.785241	3.15e-08
AAEL002825	-0.623623	2e-06
AAEL002827	-0.796948	0.000756157
AAEL002828	0.191554	0.395243
AAEL002829	-0.484294	7.86e-05
AAEL002830	0.438374	0.272384
AAEL002831	0.195976	0.613469
AAEL002832	-0.234874	0.057889
AAEL002833	-1.07889	5.32e-22
AAEL002834	-3.63428	3.47e-158
AAEL002835	-0.557127	4.12e-06
AAEL002836	-0.08099	0.767526
AAEL002837	-0.560355	0.000632239
AAEL002839	-0.245742	0.33643
AAEL002840	-0.467482	0.0093926
AAEL002841	0.210812	0.189931
AAEL002842	-0.355375	0.180386
AAEL002843	-1.02045	4.59e-11
AAEL002844	-0.105178	0.657495
AAEL002846	-0.365809	0.11821
AAEL002847	0.0975006	0.824427
AAEL002848	1.67004	3.45e-42
AAEL002849	-0.0789853	0.824467
AAEL002850	0.888975	2.26e-12
AAEL002851	0.293711	0.00164993
AAEL002852	-0.0999352	0.83197
AAEL002853	3.14832	6.16e-78
AAEL002854	0.303741	0.531667
AAEL002856	-0.330796	0.0341463
AAEL002858	-0.257575	0.269822
AAEL002860	-2.42657	1.75e-89
AAEL002861	-0.575818	0.43965
AAEL002862	-0.788715	1.49e-10
AAEL002863	-0.168683	0.508936
AAEL002864	0.353458	0.012528
AAEL002866	-0.160781	0.249836
AAEL002867	-0.275887	0.36223
AAEL002868	0.29047	0.387464
AAEL002869	0.588101	3.77e-07
AAEL002870	-0.0659544	0.713827
AAEL002871	0.313114	0.00420528
AAEL002873	0.181531	0.726437
AAEL002874	0.150278	0.709587
AAEL002875	-3.49474	7.73e-29
AAEL002876	0.33861	0.64741
AAEL002877	-0.362972	0.441202
AAEL002879	-0.2074	0.811725
AAEL002880	-1.51745	0.00255967
AAEL002881	-0.80001	1.79e-12
AAEL002882	0.288068	0.0304091
AAEL002883	0.321025	0.238888
AAEL002885	0.0215357	0.90801
AAEL002886	-0.831832	2.37e-13
AAEL002887	0.652774	4.58e-11
AAEL002888	-0.489591	0.000847069
AAEL002890	0.136081	0.408404
AAEL002891	0.585634	5.78e-05
AAEL002892	-0.0781673	0.803364
AAEL002893	0.517313	0.0721581
AAEL002895	-0.0319994	0.885293
AAEL002896	0.450487	0.000555975
AAEL002898	1.15126	6.74e-06
AAEL002900	-0.458682	0.0581682
AAEL002902	0.237752	0.519837
AAEL002903	0.201495	0.152195
AAEL002904	-3.04414	7.01e-54
[truncated: 9,119 more rows]

## Sheet: 11 dpov
Gene	Log2FC in Diapause	FDR corrected p-value
AAEL000001	-0.102251	0.837686
AAEL000003	0.152795	0.799108
AAEL000004	0.121359	0.830884
AAEL000005	0.0800737	0.901355
AAEL000006	0.0718824	0.967826
AAEL000008	0.171441	0.761306
AAEL000013	0.0127606	0.984766
AAEL000015	-0.027914	0.976099
AAEL000016	0.103294	0.88698
AAEL000020	0.0760334	0.946386
AAEL000021	-0.0106918	0.991926
AAEL000022	-0.166268	0.859034
AAEL000026	-0.100786	0.926866
AAEL000028	-0.538641	0.370843
AAEL000029	-0.0203979	0.984922
AAEL000032	-0.116717	0.811419
AAEL000033	-0.0794029	0.901355
AAEL000038	0.183275	0.770382
AAEL000040	-0.0384596	0.976898
AAEL000042	-0.235884	0.525709
AAEL000046	-0.257515	0.845317
AAEL000049	0.20251	0.858423
AAEL000050	-0.0552994	0.964949
AAEL000053	-0.715469	0.439057
AAEL000054	-0.601351	0.353514
AAEL000055	0.0358752	0.963918
AAEL000060	-0.318633	0.879022
AAEL000062	-0.0665416	0.932599
AAEL000064	0.314305	0.289718
AAEL000065	-0.009477	0.993546
AAEL000068	-0.153561	0.954543
AAEL000070	0.365282	0.552884
AAEL000074	0.182001	0.774786
AAEL000077	-0.105313	0.803757
AAEL000078	0.110733	0.954675
AAEL000079	0.275147	0.774134
AAEL000080	0.651679	0.00451728
AAEL000081	-0.251715	0.295456
AAEL000083	-0.276111	0.914652
AAEL000084	-0.0760834	0.881817
AAEL000088	-0.0648413	0.928226
AAEL000090	-0.221596	0.552884
AAEL000091	-0.295209	0.552884
AAEL000092	0.548062	0.163861
AAEL000093	0.250015	0.625367
AAEL000094	0.965443	0.516147
AAEL000098	0.339609	0.677807
AAEL000099	-0.16725	0.669758
AAEL000101	0.148641	0.825271
AAEL000102	0.183489	0.631577
AAEL000104	0.829328	0.425269
AAEL000106	-0.108993	0.904207
AAEL000107	0.3398	0.436388
AAEL000109	-0.629372	5.36e-05
AAEL000111	0.410386	0.517811
AAEL000116	-0.107148	0.839016
AAEL000118	0.0484754	0.952902
AAEL000119	-0.159271	0.885068
AAEL000121	-0.112842	0.966535
AAEL000122	-0.230849	0.802755
AAEL000126	-0.208122	0.545383
AAEL000128	-0.290445	0.340759
AAEL000131	0.385451	0.371914
AAEL000134	-0.199524	0.602944
AAEL000135	-0.225235	0.567181
AAEL000136	-0.260105	0.959418
AAEL000137	0.218659	0.460599
AAEL000138	-0.198318	0.906907
AAEL000140	-0.14763	0.876585
AAEL000142	0.153356	0.873061
AAEL000143	0.610189	0.50611
AAEL000147	0.0517468	0.963918
AAEL000149	0.0206408	0.983919
AAEL000151	-0.17408	0.846855
AAEL000152	-0.096315	0.843356
AAEL000153	-0.506862	0.637977
AAEL000154	-0.438589	0.617805
AAEL000157	-0.283765	0.510648
AAEL000158	-0.107596	0.954304
AAEL000159	0.222571	0.617311
AAEL000161	-0.140786	0.887415
AAEL000163	0.643442	0.169946
AAEL000164	-0.052636	0.952955
AAEL000165	0.322838	0.784726
AAEL000166	0.923975	0.182688
AAEL000170	0.025765	0.979145
AAEL000171	0.30778	0.934273
AAEL000172	-0.469871	0.0552419
AAEL000173	0.0407429	0.968816
AAEL000174	-0.327413	0.838024
AAEL000175	-0.358232	0.10504
AAEL000176	-0.228428	0.818277
AAEL000178	0.157017	0.846502
AAEL000179	-0.227553	0.570213
AAEL000181	-0.119459	0.78348
AAEL000184	0.210868	0.842938
AAEL000185	-0.260658	0.296989
AAEL000186	-0.494855	0.0668401
AAEL000187	0.0628633	0.977186
AAEL000191	0.106524	0.850428
AAEL000192	0.137532	0.855869
AAEL000193	0.0667411	0.93589
AAEL000194	0.0596677	0.936982
AAEL000195	-0.0584966	0.936019
AAEL000197	-0.310789	0.341232
AAEL000199	-0.0171827	0.980391
AAEL000200	0.919081	0.0913448
AAEL000201	0.01986	0.984703
AAEL000204	-0.00750917	0.992896
AAEL000208	-0.0473198	0.956448
AAEL000209	0.199947	0.892115
AAEL000210	0.151724	0.801532
AAEL000211	0.328893	0.539146
AAEL000212	-0.345536	0.186804
AAEL000213	0.414439	0.661439
AAEL000214	-0.14967	0.869634
AAEL000215	-0.151227	0.885068
AAEL000217	-0.0614351	0.941812
AAEL000219	0.24771	0.580426
AAEL000221	-0.00943532	0.992804
AAEL000222	0.267821	0.60882
AAEL000227	-0.976903	4.82e-08
AAEL000228	-0.188266	0.775752
AAEL000230	0.495316	0.341886
AAEL000231	-0.00304887	0.996021
AAEL000233	0.0618929	0.965475
AAEL000234	0.780049	0.0221758
AAEL000235	0.193517	0.684233
AAEL000236	0.0967253	0.89815
AAEL000237	0.226259	0.913342
AAEL000239	0.252286	0.631384
AAEL000240	-0.335656	0.421286
AAEL000241	-0.184724	0.659673
AAEL000242	-0.146286	0.930135
AAEL000243	-0.279116	0.770382
AAEL000244	0.0563394	0.947136
AAEL000245	0.286333	0.774134
AAEL000246	-0.0962297	0.897767
AAEL000248	-0.0957433	0.875187
AAEL000250	0.360814	0.726652
AAEL000251	0.259134	0.811419
AAEL000254	0.136223	0.856889
AAEL000255	-0.0450975	0.976099
AAEL000256	-0.241844	0.585021
AAEL000257	-0.0605052	0.913479
AAEL000258	-0.0777943	0.882136
AAEL000260	0.225674	0.626965
AAEL000261	0.242372	0.762394
AAEL000262	0.252856	0.805038
AAEL000263	0.208444	0.84196
AAEL000264	0.137993	0.745772
AAEL000265	0.00716195	0.9966
AAEL000266	0.383974	0.726652
AAEL000268	0.939067	0.016945
AAEL000269	-0.21969	0.601596
AAEL000270	0.0411353	0.97275
AAEL000271	-0.146115	0.837686
AAEL000272	0.442945	0.719041
AAEL000273	0.300436	0.524281
AAEL000276	0.133235	0.80271
AAEL000277	0.186169	0.780186
AAEL000278	0.113143	0.878989
AAEL000279	0.209284	0.663981
AAEL000281	0.00538947	0.995457
AAEL000284	0.067325	0.967533
AAEL000287	0.136808	0.921288
AAEL000288	-0.0553047	0.925401
AAEL000289	-0.135181	0.885068
AAEL000291	-0.14621	0.719988
AAEL000292	-0.0992049	0.901631
AAEL000293	0.300037	0.604313
AAEL000294	-0.0433437	0.955689
AAEL000295	0.433526	0.180933
AAEL000296	-0.00303555	0.997463
AAEL000297	0.474799	0.368338
AAEL000298	0.560487	0.65
AAEL000299	-0.0858461	0.947101
AAEL000300	0.323519	0.615965
AAEL000301	-0.0426619	0.949781
AAEL000304	0.571099	0.00402724
AAEL000305	-0.559655	0.150801
AAEL000309	-0.167097	0.866345
AAEL000311	-0.941112	1.52e-06
AAEL000312	0.20519	0.775752
AAEL000314	1.02385	3.55e-07
AAEL000315	0.0825881	0.876585
AAEL000316	0.463561	0.306288
AAEL000322	0.215201	0.760884
AAEL000323	1.93614	6.64e-20
AAEL000324	-0.127694	0.893441
AAEL000328	0.418442	0.0303097
AAEL000330	-0.0807388	0.894712
AAEL000331	0.0263369	0.978751
AAEL000332	0.405158	0.668835
AAEL000334	-0.242032	0.68208
AAEL000335	0.705133	0.692573
AAEL000336	-0.145774	0.926102
AAEL000337	0.636495	0.319843
AAEL000338	0.263088	0.66745
AAEL000339	0.291777	0.237492
AAEL000341	0.105843	0.916056
AAEL000342	-0.111729	0.922423
AAEL000343	0.0445545	0.949328
AAEL000345	-0.41393	0.745772
AAEL000346	-0.928901	0.533185
AAEL000349	-0.130578	0.961884
AAEL000353	0.0891887	0.971259
AAEL000362	1.02487	0.0467729
AAEL000365	-0.15191	0.78348
AAEL000368	-0.0527186	0.979145
AAEL000369	1.33289	3e-15
AAEL000370	-0.0637218	0.919427
AAEL000376	0.0116442	0.996643
AAEL000378	0.386691	0.158723
AAEL000380	0.227377	0.754105
AAEL000383	-0.0914149	0.948711
AAEL000385	-0.0568278	0.934078
AAEL000386	-0.095948	0.88698
AAEL000388	-0.237469	0.351838
AAEL000389	-1.16078	2.74e-15
AAEL000393	0.0130603	0.987599
AAEL000394	-0.181021	0.70793
AAEL000395	-0.0403951	0.963918
AAEL000438	0.539944	0.217774
AAEL000439	-0.0365819	0.98332
AAEL000440	-0.11522	0.834056
AAEL000441	-0.238907	0.668404
AAEL000442	-0.759841	0.384396
AAEL000444	-0.187162	0.646575
AAEL000445	-0.121006	0.80271
AAEL000446	0.131735	0.851406
AAEL000448	0.216427	0.605221
AAEL000450	-0.128286	0.876585
AAEL000451	0.16451	0.78348
AAEL000452	-0.219986	0.551601
AAEL000454	0.172991	0.608401
AAEL000455	-0.0311033	0.977557
AAEL000456	0.176747	0.886327
AAEL000457	-0.627471	0.604313
AAEL000458	0.191092	0.759803
AAEL000459	-0.0814287	0.901765
AAEL000460	0.0888177	0.88077
AAEL000461	-0.0927425	0.898571
AAEL000463	0.610979	0.338901
AAEL000464	0.0774619	0.904391
AAEL000465	0.0975973	0.955681
AAEL000466	-0.181698	0.947134
AAEL000467	-0.00714953	0.996147
AAEL000468	0.340399	0.824329
AAEL000469	-0.499289	0.0772968
AAEL000471	-0.578578	0.0718547
AAEL000472	0.661949	0.147614
AAEL000474	0.108173	0.956475
AAEL000475	0.168176	0.826402
AAEL000476	0.129282	0.952415
AAEL000477	-0.227857	0.540262
AAEL000478	-0.033512	0.980008
AAEL000479	-0.334118	0.812181
AAEL000481	-0.177693	0.936019
AAEL000483	0.233209	0.707646
AAEL000485	0.197893	0.560317
AAEL000486	-0.205434	0.438613
AAEL000487	0.0387548	0.969731
AAEL000488	-0.206326	0.691956
AAEL000489	-0.0286964	0.983361
AAEL000493	0.0300455	0.985416
AAEL000498	0.940344	0.373016
AAEL000500	1.97442	5.56e-09
AAEL000502	0.0817208	0.939164
AAEL000504	-0.0429323	0.984804
AAEL000505	-0.0389282	0.952578
AAEL000508	0.245983	0.657754
AAEL000509	0.191759	0.876585
AAEL000510	-0.101564	0.843995
AAEL000511	-0.41032	0.734409
AAEL000512	0.345218	0.738405
AAEL000516	-0.151132	0.710482
AAEL000519	-0.131974	0.837172
AAEL000520	0.0591435	0.955681
AAEL000522	-0.345456	0.256221
AAEL000523	-0.150138	0.841385
AAEL000524	-0.328304	0.818881
AAEL000527	-0.202839	0.555116
AAEL000531	0.164226	0.729742
AAEL000532	0.117801	0.937728
AAEL000536	0.362201	0.467111
AAEL000540	-0.249351	0.513141
AAEL000541	0.261723	0.615965
AAEL000546	-0.25702	0.719373
AAEL000549	-0.168563	0.707922
AAEL000550	0.0868893	0.912014
AAEL000551	-0.0285358	0.966535
AAEL000553	-0.164633	0.88077
AAEL000554	-0.346061	0.166527
AAEL000557	-0.189774	0.885068
AAEL000558	0.122211	0.853079
AAEL000559	-0.100392	0.858942
AAEL000561	0.109719	0.936632
AAEL000562	-0.0430717	0.967542
AAEL000564	0.117847	0.83259
AAEL000565	0.295997	0.696224
AAEL000566	-1.34138	0.44896
AAEL000567	-0.127116	0.781133
AAEL000569	-0.313191	0.391075
AAEL000570	-0.219431	0.939659
AAEL000571	0.318102	0.719041
AAEL000572	0.46191	0.0325316
AAEL000573	-0.182868	0.933858
AAEL000574	0.0259089	0.970375
AAEL000576	0.00808631	0.994521
AAEL000577	0.0680179	0.939659
AAEL000578	0.74967	0.206818
AAEL000580	-0.304147	0.80271
AAEL000581	-0.0598643	0.928492
AAEL000583	0.154623	0.860769
AAEL000584	-0.0145502	0.992325
AAEL000585	0.644323	0.0136812
AAEL000586	0.523272	0.870361
AAEL000588	0.0860253	0.900783
AAEL000589	0.00446543	0.994521
AAEL000590	0.157314	0.774786
AAEL000591	0.151184	0.893441
AAEL000592	0.292069	0.897767
AAEL000593	0.136275	0.867934
AAEL000595	0.129289	0.856776
AAEL000596	-0.102482	0.897767
AAEL000597	0.216948	0.775292
AAEL000600	0.299865	0.811575
AAEL000602	0.175671	0.822819
AAEL000604	-0.204428	0.84313
AAEL000605	0.367144	0.597876
AAEL000607	0.270568	0.889119
AAEL000608	0.176313	0.692031
AAEL000609	0.970738	0.00737889
AAEL000612	0.237758	0.679484
AAEL000617	0.16358	0.901355
AAEL000618	0.0458655	0.967533
AAEL000620	-0.310032	0.489761
AAEL000622	-0.205688	0.514378
AAEL000624	-0.286149	0.604313
AAEL000626	-0.331371	0.842938
AAEL000629	0.849445	0.382051
AAEL000630	-0.1079	0.946386
AAEL000631	-0.0234847	0.990113
AAEL000634	-0.245572	0.719041
AAEL000635	0.303073	0.571179
AAEL000636	-0.172701	0.944487
AAEL000638	-0.0469433	0.962089
AAEL000639	-0.341563	0.319843
AAEL000640	-0.740599	6.46e-05
AAEL000641	-0.373214	0.0600723
AAEL000642	0.789146	0.131171
AAEL000643	-0.203792	0.551204
AAEL000644	0.00448539	0.994521
AAEL000645	-0.029097	0.98332
AAEL000649	-0.110517	0.873061
AAEL000650	-0.0740274	0.944163
AAEL000654	-0.0313107	0.959089
AAEL000655	0.196265	0.647276
AAEL000656	0.456972	0.57388
AAEL000657	0.025947	0.984264
AAEL000659	0.125446	0.912332
AAEL000660	-0.0705969	0.972693
AAEL000661	-0.296931	0.571715
AAEL000662	-0.931066	0.418774
AAEL000663	0.0919909	0.844135
AAEL000666	-0.198404	0.626716
AAEL000669	-0.0549167	0.946794
AAEL000670	-0.238615	0.904133
AAEL000670	-0.988709	2.67e-06
AAEL000671	-0.385429	0.741641
AAEL000672	0.242492	0.493615
AAEL000673	-0.142189	0.873061
AAEL000674	-0.249294	0.437432
AAEL000676	-0.523975	0.726499
AAEL000677	-0.115199	0.859034
AAEL000679	0.113291	0.884619
AAEL000682	-0.0592327	0.93589
AAEL000685	0.102323	0.894679
AAEL000691	-0.523011	0.730561
AAEL000692	0.825154	0.0303072
AAEL000693	0.198486	0.618263
AAEL000695	-0.36752	0.648635
AAEL000696	0.553642	0.675161
AAEL000697	0.169134	0.913479
AAEL000698	-0.500621	0.458671
AAEL000699	-0.142447	0.817784
AAEL000700	-0.177548	0.806972
AAEL000701	0.369535	0.407392
AAEL000702	0.267443	0.585021
AAEL000703	0.463644	0.0305512
AAEL000704	-0.436073	0.70278
AAEL000706	-0.0738283	0.88077
AAEL000707	-0.192458	0.66745
AAEL000708	0.0206294	0.984703
AAEL000709	0.348523	0.190633
AAEL000711	0.308468	0.341815
AAEL000712	-0.180767	0.936632
AAEL000713	0.0914788	0.825655
AAEL000714	-0.21536	0.68661
AAEL000715	0.533358	0.454775
AAEL000716	0.0678293	0.928492
AAEL000717	-0.23436	0.843989
AAEL000718	-0.131523	0.754611
AAEL000719	-0.0119837	0.984472
AAEL000720	0.156516	0.806972
AAEL000721	-0.353348	0.543786
AAEL000722	0.554608	0.415197
AAEL000723	0.612753	0.250184
AAEL000724	0.263405	0.630088
AAEL000727	-0.370112	0.898174
AAEL000728	-0.507896	0.542136
AAEL000729	-0.239814	0.862667
AAEL000730	-0.212425	0.488883
AAEL000733	0.136821	0.820623
AAEL000734	0.0133494	0.992896
AAEL000737	-0.112371	0.839899
AAEL000738	0.291748	0.329582
AAEL000739	-0.210373	0.691956
AAEL000741	0.763784	0.00302429
AAEL000743	-0.340721	0.446163
AAEL000744	0.147216	0.706841
AAEL000745	0.518515	0.284388
AAEL000746	-0.229615	0.520563
AAEL000747	0.387754	0.560317
AAEL000750	-0.248019	0.409244
AAEL000752	-0.215454	0.563854
AAEL000753	0.173376	0.726652
AAEL000755	0.89761	0.308173
AAEL000758	-0.429582	0.0171346
AAEL000759	0.0981647	0.866345
AAEL000761	-0.319952	0.726652
AAEL000763	0.0561399	0.965475
AAEL000765	-0.329328	0.745804
AAEL000766	0.291259	0.51792
AAEL000767	-0.0105523	0.987719
AAEL000770	-0.29864	0.621236
AAEL000771	0.0521428	0.983361
AAEL000772	1.19448	0.245092
AAEL000773	-0.0772448	0.924303
AAEL000776	-0.662575	0.0772968
AAEL000778	0.691797	0.0647799
AAEL000780	-0.172422	0.707646
AAEL000781	0.295577	0.77374
AAEL000782	-0.091658	0.881587
AAEL000784	0.266641	0.839643
AAEL000785	-0.0195115	0.985109
AAEL000787	0.119897	0.873747
AAEL000788	0.189114	0.686045
AAEL000791	0.0410372	0.959814
AAEL000794	-0.0715205	0.921288
AAEL000798	-0.140102	0.755309
AAEL000800	-0.183888	0.873061
AAEL000801	-0.457446	0.519639
AAEL000802	-0.0078336	0.992563
AAEL000804	-0.387505	0.0430167
AAEL000805	0.0349508	0.991538
AAEL000807	-0.0238196	0.979145
AAEL000809	-0.436739	0.684398
AAEL000810	-0.409682	0.674841
AAEL000811	0.15834	0.850428
AAEL000812	0.253895	0.43429
AAEL000813	-0.587288	0.00982802
AAEL000815	-0.200247	0.668994
AAEL000816	-0.11309	0.900743
AAEL000817	0.299839	0.825617
AAEL000818	-0.209959	0.759068
AAEL000819	0.0586227	0.958843
AAEL000820	-2.30511	1.91e-06
AAEL000822	-0.274757	0.661719
AAEL000823	-0.0370411	0.96471
AAEL000824	-0.109814	0.806735
AAEL000825	0.0886768	0.86703
AAEL000832	-0.4139	0.0647808
AAEL000834	-0.164448	0.668835
AAEL000836	0.370642	0.458671
AAEL000838	0.128057	0.899849
AAEL000839	-0.413189	0.781133
AAEL000840	-0.00657274	0.991538
AAEL000841	-0.202014	0.930794
AAEL000842	-0.0937119	0.928298
AAEL000844	-0.175958	0.699107
AAEL000845	0.258424	0.438613
AAEL000845	-0.0886692	0.888959
AAEL000847	0.200753	0.812181
AAEL000848	0.189189	0.714139
AAEL000850	0.076689	0.90713
AAEL000851	-0.0271396	0.969731
AAEL000852	0.455353	0.585712
AAEL000853	0.229959	0.779842
AAEL000854	-0.0680369	0.930222
AAEL000855	-0.0331352	0.963918
AAEL000856	0.0823263	0.899849
AAEL000857	-0.161937	0.784726
AAEL000858	0.437924	0.17794
AAEL000859	0.0364033	0.976099
AAEL000860	-0.0183875	0.991538
AAEL000865	-0.309876	0.917555
AAEL000867	0.424119	0.265577
AAEL000871	-0.0636574	0.922254
AAEL000874	0.0751371	0.962743
AAEL000875	0.134386	0.881108
AAEL000880	-0.223895	0.615965
AAEL000881	1.35821	0.524281
AAEL000883	-0.314207	0.353514
AAEL000884	0.123575	0.824703
AAEL000888	0.154124	0.80271
AAEL000890	-0.340588	0.806972
AAEL000893	-0.00689808	0.993695
AAEL000895	-0.0519207	0.928484
AAEL000896	-0.311527	0.838375
AAEL000897	-0.050603	0.958843
AAEL000899	0.0860248	0.919427
AAEL000900	-0.746205	0.327561
AAEL000901	0.248023	0.70793
AAEL000902	-0.0637618	0.898174
AAEL000903	-0.188247	0.744928
AAEL000904	-0.111025	0.825271
AAEL000905	0.458568	0.222148
AAEL000906	0.353152	0.596514
AAEL000907	0.0222056	0.984408
AAEL000909	1.43478	8.39e-15
AAEL000914	2.10307	2.03e-20
AAEL000918	0.0232948	0.980008
AAEL000920	-0.20018	0.90267
AAEL000921	1.67982	3.1e-16
AAEL000922	0.24412	0.60123
AAEL000923	-0.198407	0.907396
AAEL000924	0.0733723	0.907224
AAEL000925	0.228739	0.70215
AAEL000927	0.0747773	0.978714
AAEL000930	-0.0349184	0.956892
AAEL000931	-0.374032	0.133773
AAEL000933	0.00684147	0.992325
AAEL000934	-0.068024	0.897767
AAEL000936	-0.383234	0.498761
AAEL000937	0.314054	0.837686
AAEL000938	0.179794	0.806183
AAEL000939	0.00811324	0.994486
AAEL000940	0.491177	0.674965
AAEL000941	0.0870304	0.885898
AAEL000942	0.204616	0.714751
AAEL000943	0.366298	0.562309
AAEL000944	0.0612424	0.916483
AAEL000947	-0.185583	0.726652
AAEL000948	-0.266961	0.615965
AAEL000949	0.165515	0.779341
AAEL000950	-0.169179	0.691956
AAEL000951	-0.103134	0.846525
AAEL000952	0.0480173	0.952578
AAEL000953	-0.0822983	0.901631
AAEL000954	0.257009	0.709247
AAEL000955	-0.187091	0.595524
AAEL000956	0.118919	0.80271
AAEL000958	0.440888	0.289332
AAEL000959	0.462637	0.578485
AAEL000960	0.412862	0.673979
AAEL000962	0.00273427	0.997463
AAEL000963	0.14633	0.834737
AAEL000964	-0.0374159	0.977011
AAEL000965	-0.0873784	0.862667
AAEL000967	-0.645187	0.607446
AAEL000970	-0.23582	0.522355
AAEL000970	0.0970583	0.89492
AAEL000972	-0.0736762	0.969145
AAEL000973	1.08753	4.82e-05
AAEL000978	-0.240763	0.738405
AAEL000979	0.558954	0.4179
AAEL000980	-0.26156	0.810069
AAEL000981	0.429433	0.505574
AAEL000982	-0.460103	0.0913448
AAEL000983	0.0895233	0.898174
AAEL000984	0.0519345	0.951648
AAEL000985	0.0562835	0.930135
AAEL000986	0.298995	0.466438
AAEL000987	0.003556	0.996147
AAEL000988	0.0534738	0.956415
AAEL000990	0.304975	0.566447
AAEL000992	-0.444761	0.755309
AAEL000993	0.251805	0.888959
AAEL000994	-0.222417	0.680291
AAEL000996	-0.208554	0.566447
AAEL000999	-0.0645425	0.928834
AAEL001000	0.00224509	0.997463
AAEL001001	0.140299	0.910948
AAEL001002	-0.53458	0.429102
AAEL001004	0.49075	0.654913
AAEL001005	-0.47942	0.0853302
AAEL001007	-0.177653	0.620394
AAEL001008	-0.300679	0.755309
AAEL001009	0.0968989	0.936982
AAEL001010	0.5983	0.379999
AAEL001011	0.26684	0.784726
AAEL001014	-0.262935	0.51596
AAEL001016	0.156156	0.872307
AAEL001017	0.0673192	0.96837
AAEL001019	0.0700711	0.906615
AAEL001024	-0.0043826	0.994486
AAEL001026	0.260616	0.905254
AAEL001029	0.748172	0.630088
AAEL001030	0.159747	0.825271
AAEL001031	0.175072	0.692074
AAEL001032	0.28424	0.817689
AAEL001033	-0.130447	0.90421
AAEL001034	0.201658	0.936982
AAEL001036	0.276358	0.463479
AAEL001037	-0.211537	0.56571
AAEL001038	0.0353956	0.969145
AAEL001039	0.0876981	0.936632
AAEL001044	-0.239644	0.410381
AAEL001046	-0.0677369	0.92866
AAEL001047	0.0306672	0.972693
AAEL001048	0.171611	0.845572
AAEL001050	-0.313947	0.639111
AAEL001052	0.202085	0.596514
AAEL001054	0.420256	0.646575
AAEL001056	0.232781	0.520148
AAEL001060	0.0273116	0.98332
AAEL001061	0.107524	0.949545
AAEL001062	-0.067453	0.936019
AAEL001065	0.0985231	0.910198
AAEL001068	0.888069	0.539669
AAEL001069	0.0788562	0.908013
AAEL001071	0.325604	0.551601
AAEL001074	0.577227	0.610504
AAEL001075	0.427899	0.608886
AAEL001077	0.247074	0.443484
AAEL001078	0.497012	0.319843
AAEL001079	-0.626567	0.603473
AAEL001080	0.259013	0.784726
AAEL001081	1.83502	4.68e-28
AAEL001082	-0.575157	0.0225928
AAEL001084	0.430227	0.0875995
AAEL001085	0.211486	0.869657
AAEL001086	0.0267632	0.98332
AAEL001088	-0.218809	0.631577
AAEL001090	0.410873	0.575331
AAEL001091	0.166513	0.59713
AAEL001092	0.0996101	0.857439
AAEL001093	0.60264	0.547287
AAEL001094	0.0495083	0.954304
AAEL001095	-0.131836	0.928952
AAEL001097	0.104784	0.941684
AAEL001098	0.227342	0.595524
AAEL001099	-0.186514	0.631577
AAEL001100	0.167106	0.7365
AAEL001101	-0.315451	0.255273
AAEL001102	-0.339127	0.147156
AAEL001103	-0.0323439	0.967846
AAEL001104	0.265666	0.43492
AAEL001105	0.0741119	0.944912
AAEL001106	0.0715791	0.912332
AAEL001107	0.0727981	0.973828
AAEL001108	0.240456	0.789166
AAEL001109	0.634726	0.050365
AAEL001110	0.212892	0.838375
AAEL001111	0.0905257	0.886327
AAEL001112	0.412635	0.369954
AAEL001113	-0.0284875	0.973828
AAEL001114	-0.0300936	0.967533
AAEL001116	-0.359522	0.79474
AAEL001118	-0.0214613	0.990069
AAEL001119	-0.115017	0.823827
AAEL001121	-0.293061	0.297282
AAEL001123	-0.0380363	0.981501
AAEL001124	-0.0133775	0.984472
AAEL001126	-0.352691	0.0865007
AAEL001127	-0.23269	0.615965
AAEL001128	0.0377341	0.972643
AAEL001129	-0.152931	0.691345
AAEL001132	0.143501	0.839643
AAEL001133	0.0755711	0.910656
AAEL001134	-0.768078	6.1e-06
AAEL001135	0.359391	0.839643
AAEL001136	-0.0071664	0.997463
AAEL001137	-0.159256	0.91037
AAEL001139	-0.442499	0.327561
AAEL001140	-0.253414	0.781133
AAEL001141	-0.422894	0.0270713
AAEL001142	0.18577	0.774131
AAEL001144	-0.00204118	0.997463
AAEL001145	-0.219226	0.596514
AAEL001146	-0.172103	0.919427
AAEL001147	-0.324015	0.636966
AAEL001148	-0.0697254	0.963918
AAEL001149	0.267116	0.525864
AAEL001151	0.054612	0.951648
AAEL001152	0.122507	0.841459
AAEL001154	0.0248733	0.976898
AAEL001155	-0.255062	0.667711
AAEL001156	-0.308054	0.789187
AAEL001157	-0.163296	0.853951
AAEL001158	-0.0258986	0.972693
AAEL001159	0.259981	0.590193
AAEL001161	0.932495	0.610184
AAEL001162	0.00336288	0.997463
AAEL001163	-1.27371	1.24e-07
AAEL001164	0.210455	0.628249
AAEL001165	-0.0500174	0.967826
AAEL001166	-0.1203	0.799582
AAEL001167	-0.125887	0.842974
AAEL001168	-0.515991	0.754105
AAEL001169	-0.164608	0.79474
AAEL001170	-0.158852	0.696556
AAEL001171	-0.215735	0.463258
AAEL001172	0.146669	0.858517
AAEL001173	-0.221434	0.547737
AAEL001175	-0.206492	0.679484
AAEL001176	-0.627672	0.0237939
AAEL001177	0.0228342	0.980391
AAEL001178	-4.22916	0.0129713
AAEL001179	1.56533	0.425456
AAEL001181	0.108825	0.941684
AAEL001182	0.28045	0.546172
AAEL001183	-0.205456	0.726652
AAEL001184	-0.0823217	0.924715
AAEL001185	-0.159823	0.90375
AAEL001186	-0.290523	0.84313
AAEL001187	-0.00219818	0.997463
AAEL001188	0.0236659	0.971809
AAEL001190	-1.0999	0.188448
AAEL001191	-0.275424	0.548346
AAEL001192	-0.202031	0.719701
AAEL001194	-0.159732	0.877889
AAEL001198	0.000380551	0.998863
AAEL001199	-0.00473494	0.997463
AAEL001200	-0.0971701	0.917861
AAEL001201	0.0499855	0.947101
AAEL001203	-0.122289	0.844476
AAEL001204	0.347831	0.169074
AAEL001205	-0.282274	0.374628
AAEL001206	-0.27321	0.262297
AAEL001207	-0.0572227	0.934273
AAEL001208	0.00455974	0.997463
AAEL001209	-0.0514825	0.923193
AAEL001210	0.266214	0.601423
AAEL001211	-0.0417232	0.956415
AAEL001212	0.19884	0.707812
AAEL001215	-0.0411905	0.952526
AAEL001216	-0.110791	0.759068
AAEL001218	-0.215406	0.437232
AAEL001219	0.36158	0.554524
AAEL001220	-0.158645	0.77226
AAEL001223	0.00568604	0.996006
AAEL001227	-0.0594182	0.979309
AAEL001228	0.931964	0.0935032
AAEL001229	-0.546084	0.305632
AAEL001230	0.036534	0.956415
AAEL001232	0.0158782	0.98332
AAEL001233	0.0843707	0.913042
AAEL001235	0.113818	0.827941
AAEL001236	0.334052	0.78348
AAEL001237	-0.108372	0.96837
AAEL001238	-0.038617	0.955681
AAEL001239	0.0750042	0.965603
AAEL001240	-0.426018	0.694812
AAEL001241	0.975009	0.00372595
AAEL001242	0.240545	0.618961
AAEL001243	0.434288	0.485301
AAEL001244	0.159188	0.730369
AAEL001245	0.112508	0.925122
AAEL001246	0.179204	0.854128
AAEL001247	0.0190571	0.992218
AAEL001248	0.0796202	0.98332
AAEL001249	0.042806	0.977186
AAEL001250	0.0849305	0.902434
AAEL001251	0.349733	0.741854
AAEL001252	-0.0953009	0.864941
AAEL001254	-0.161026	0.767985
AAEL001255	0.311191	0.402839
AAEL001257	0.377312	0.360447
AAEL001258	-0.440517	0.620394
AAEL001260	-0.260585	0.725685
AAEL001261	0.0683024	0.951461
AAEL001264	-0.184357	0.648703
AAEL001266	0.0770233	0.897991
AAEL001269	-0.186492	0.581183
AAEL001270	-0.0369527	0.959044
AAEL001271	0.178702	0.784726
AAEL001273	-0.296765	0.361536
AAEL001275	-0.0185226	0.979145
AAEL001276	0.108607	0.959743
AAEL001278	0.125118	0.933861
AAEL001279	-0.410257	0.131171
AAEL001281	0.67533	0.399423
AAEL001282	0.108022	0.856776
AAEL001283	0.100557	0.928492
AAEL001284	-0.405671	0.843356
AAEL001287	0.0545201	0.956448
AAEL001289	0.427532	0.720506
AAEL001290	-1.46243	0.0517787
AAEL001293	-1.1998	7.22e-05
AAEL001294	-0.240745	0.516799
AAEL001295	0.968784	0.0178059
AAEL001296	0.0813188	0.926102
AAEL001297	-0.122966	0.928952
AAEL001298	0.677511	0.165422
AAEL001299	0.407625	0.538049
AAEL001300	0.266048	0.58884
AAEL001301	0.0767057	0.913697
AAEL001304	0.116379	0.812485
AAEL001305	-0.583833	0.0762602
AAEL001306	-0.298343	0.398416
AAEL001307	-0.634271	0.000199811
AAEL001308	0.0215413	0.979145
AAEL001313	0.105262	0.897767
AAEL001314	0.0896405	0.927353
AAEL001315	0.0468967	0.958617
AAEL001316	1.53748	0.0282258
AAEL001317	0.31743	0.476727
AAEL001318	0.256539	0.378564
AAEL001319	-0.647154	0.345548
AAEL001320	0.0553625	0.92866
AAEL001321	-0.213284	0.590166
AAEL001322	-0.0200084	0.97818
AAEL001323	0.188503	0.547287
AAEL001324	0.253352	0.509073
AAEL001325	0.105152	0.930898
AAEL001326	0.134037	0.935441
AAEL001328	0.706625	0.0291526
AAEL001329	-0.0403617	0.950479
AAEL001330	0.650808	0.265378
AAEL001331	-0.128833	0.805247
AAEL001332	-0.0927222	0.889191
AAEL001334	-0.0652321	0.965005
AAEL001336	0.162283	0.843356
AAEL001337	0.426016	0.56372
AAEL001338	-0.103579	0.897767
AAEL001339	0.412279	0.382052
AAEL001341	-0.019977	0.979145
AAEL001343	0.34631	0.648703
AAEL001344	0.189754	0.917162
AAEL001348	-0.248255	0.836872
AAEL001349	-0.340104	0.581183
AAEL001350	0.046872	0.954675
AAEL001351	0.00612954	0.994001
AAEL001352	0.114375	0.80271
AAEL001353	0.198517	0.749237
AAEL001354	0.159147	0.881817
AAEL001355	0.515815	0.049215
AAEL001356	0.178518	0.673979
AAEL001357	-0.0403687	0.979387
AAEL001358	0.12891	0.86738
AAEL001359	0.585432	0.409244
AAEL001360	0.198203	0.6518
AAEL001361	-0.20924	0.560317
AAEL001363	0.124145	0.949328
AAEL001365	-0.120991	0.892115
AAEL001366	0.319344	0.707646
AAEL001367	-0.0900317	0.917659
AAEL001368	0.28674	0.418774
AAEL001370	-0.455475	0.738405
AAEL001371	0.158597	0.946386
AAEL001372	-0.215899	0.443484
AAEL001373	-0.441144	0.269979
AAEL001374	-0.245146	0.734572
AAEL001376	-0.266032	0.907396
AAEL001378	-0.204547	0.615965
AAEL001379	0.00678051	0.994001
AAEL001380	0.457714	0.592027
AAEL001381	0.124766	0.831062
AAEL001383	0.128929	0.955165
AAEL001384	-0.222575	0.901355
AAEL001385	0.121718	0.886411
AAEL001386	-0.0707784	0.980391
AAEL001387	-0.0348837	0.96837
AAEL001389	-0.209606	0.596514
AAEL001391	-0.417942	0.128567
AAEL001392	0.294609	0.491523
AAEL001393	-0.408953	0.429613
AAEL001394	-0.347028	0.122234
AAEL001395	0.0326216	0.97275
AAEL001396	0.244121	0.763773
AAEL001397	-0.0077083	0.990331
AAEL001398	0.327082	0.636966
AAEL001399	-0.0381277	0.969145
AAEL001403	0.503665	0.345506
AAEL001404	0.313748	0.680291
AAEL001405	0.102609	0.876585
AAEL001406	-0.111402	0.830884
AAEL001407	0.188845	0.68208
AAEL001409	-0.430254	0.402839
AAEL001410	-0.0482422	0.962089
AAEL001411	-0.0883713	0.908013
AAEL001416	-0.0635066	0.946386
AAEL001419	-0.461096	0.801977
AAEL001421	-0.31373	0.198456
AAEL001422	0.247346	0.648703
AAEL001423	0.22976	0.57558
AAEL001424	0.022294	0.976819
AAEL001425	0.103501	0.941104
AAEL001426	-0.242079	0.531043
AAEL001428	0.238642	0.904169
AAEL001432	-0.109939	0.781133
AAEL001433	-0.277783	0.470819
AAEL001434	0.0350854	0.980391
AAEL001435	0.841516	0.122505
AAEL001436	0.400879	0.719373
AAEL001437	0.0292192	0.98407
AAEL001438	-0.103813	0.924101
AAEL001439	0.204807	0.801977
AAEL001440	-0.100649	0.88176
AAEL001442	0.43561	0.236276
AAEL001446	-0.0979551	0.84708
AAEL001447	-0.00180264	0.997463
AAEL001448	-0.0891862	0.868114
AAEL001449	0.0379324	0.978923
AAEL001450	-0.00644803	0.997463
AAEL001451	0.0344799	0.972481
AAEL001454	-0.504926	0.516147
AAEL001455	-0.105974	0.855625
AAEL001457	0.384768	0.402608
AAEL001458	-1.13413	0.343894
AAEL001459	-0.368908	0.446473
AAEL001462	-0.425597	0.0521385
AAEL001464	0.189821	0.806972
AAEL001466	0.35768	0.580426
AAEL001467	-0.0584101	0.961884
AAEL001468	-0.526245	0.628167
AAEL001470	-0.179979	0.796526
AAEL001471	0.00337246	0.996611
AAEL001472	-0.0838835	0.872974
AAEL001473	0.0905128	0.88698
AAEL001474	0.26712	0.789187
AAEL001476	-0.231464	0.458671
AAEL001477	-0.00370145	0.997463
AAEL001478	-0.319178	0.679208
AAEL001479	-0.0150445	0.980391
AAEL001480	-0.338377	0.108282
AAEL001481	0.250345	0.648703
AAEL001482	-0.304693	0.749128
AAEL001483	-0.124507	0.93589
AAEL001484	-0.188333	0.604821
AAEL001489	-1.34117	0.149904
AAEL001490	0.553614	0.0884787
AAEL001492	-0.0202529	0.977557
AAEL001494	0.933048	0.220728
AAEL001495	0.0618851	0.921288
AAEL001496	-0.424452	0.0467729
AAEL001497	-0.252663	0.502804
AAEL001498	0.542506	0.319843
AAEL001499	-0.121753	0.794848
AAEL001500	0.0206359	0.979145
AAEL001501	-0.0990147	0.865676
AAEL001502	0.179107	0.930898
AAEL001503	-0.0161781	0.98582
AAEL001504	-0.307205	0.37366
AAEL001505	0.0949145	0.898571
AAEL001506	-0.0889201	0.900783
AAEL001507	-0.379991	0.167789
AAEL001508	-0.882151	0.0865007
AAEL001509	-0.11204	0.897991
AAEL001511	0.108836	0.889119
AAEL001513	-0.377409	0.335378
AAEL001514	-0.186039	0.794649
AAEL001515	-0.0158002	0.984973
AAEL001516	0.03796	0.96389
AAEL001518	-0.0302592	0.972693
AAEL001519	-0.282604	0.550085
AAEL001520	0.12462	0.919169
AAEL001521	0.639338	0.127866
AAEL001523	-0.570858	0.242794
AAEL001524	-0.148	0.962743
AAEL001525	0.165453	0.738405
AAEL001526	-0.155881	0.832792
AAEL001527	-0.692884	0.53262
AAEL001528	-0.47181	0.155671
AAEL001529	1.26874	0.421557
AAEL001531	0.833744	0.6518
AAEL001532	0.61976	0.00243452
AAEL001533	-0.119648	0.930898
AAEL001536	-0.801824	0.491523
AAEL001539	0.0259231	0.977186
AAEL001540	-0.0894381	0.888992
AAEL001542	0.0798505	0.952578
AAEL001545	-0.355976	0.766684
AAEL001546	0.485407	0.327415
AAEL001547	-0.120839	0.897767
AAEL001548	0.137773	0.806972
AAEL001549	0.0928676	0.932472
AAEL001553	0.83157	0.0130003
AAEL001554	0.0686874	0.939659
AAEL001556	-0.192377	0.790531
AAEL001557	-0.116929	0.801977
AAEL001561	0.0120681	0.983361
AAEL001562	-0.210279	0.57388
AAEL001563	0.761888	0.277685
AAEL001564	-0.413481	0.0172886
AAEL001565	-0.0107148	0.986881
AAEL001566	0.334009	0.888959
AAEL001567	0.0424127	0.970612
AAEL001568	0.311786	0.576821
AAEL001569	0.0760446	0.888959
AAEL001570	0.0808728	0.926866
AAEL001573	0.293027	0.504261
AAEL001574	0.0258962	0.979145
AAEL001576	-0.158924	0.694962
AAEL001580	-0.192728	0.725685
AAEL001581	-0.0396226	0.952578
AAEL001582	-0.357341	0.661439
AAEL001583	-0.123462	0.856776
AAEL001584	-0.105774	0.955689
AAEL001585	-0.0885587	0.946386
AAEL001586	0.143033	0.750439
AAEL001587	-0.187931	0.750167
AAEL001588	0.399441	0.131171
AAEL001591	0.527842	0.749237
AAEL001592	0.0849263	0.924017
AAEL001593	0.0601216	0.912014
AAEL001594	0.237126	0.704792
AAEL001597	-0.00612874	0.995613
AAEL001598	-0.123328	0.774134
AAEL001599	0.443666	0.58126
AAEL001600	0.00828707	0.994521
AAEL001601	-0.33169	0.608826
AAEL001604	-0.12815	0.907396
AAEL001605	0.048085	0.936571
AAEL001606	0.335305	0.560317
AAEL001607	0.114412	0.903667
AAEL001610	0.137166	0.888495
AAEL001612	-0.259417	0.726904
AAEL001614	0.0718637	0.945811
AAEL001615	-0.0864494	0.910198
AAEL001616	-0.340814	0.333219
AAEL001618	-0.176642	0.694962
AAEL001619	-0.0448854	0.959814
AAEL001622	0.0118364	0.987599
AAEL001623	-0.31659	0.253935
AAEL001624	-0.400693	0.770577
AAEL001625	-0.169867	0.648703
AAEL001626	0.14255	0.778227
AAEL001627	-0.354898	0.558489
AAEL001628	-0.27982	0.904041
AAEL001629	-0.11046	0.917555
AAEL001631	-0.119589	0.899849
AAEL001632	-0.440269	0.220034
AAEL001635	-0.126841	0.891869
AAEL001636	0.176725	0.751714
AAEL001638	0.148741	0.802755
AAEL001639	0.0240255	0.974699
AAEL001641	0.0791233	0.941684
AAEL001642	-0.317653	0.360447
AAEL001643	0.297114	0.87888
AAEL001645	0.0547878	0.951648
AAEL001646	-0.0671257	0.90267
AAEL001647	-0.0142763	0.985416
AAEL001648	0.221814	0.550111
AAEL001649	0.592411	0.180259
AAEL001651	0.200995	0.726652
AAEL001653	0.14347	0.921288
AAEL001655	-0.161074	0.843989
AAEL001656	0.341174	0.39284
AAEL001657	0.151962	0.822819
AAEL001658	-0.0474282	0.976242
AAEL001659	0.0987117	0.842938
AAEL001662	0.329889	0.466247
AAEL001664	-0.0699474	0.936019
AAEL001668	0.541877	0.129439
AAEL001671	0.0411142	0.979145
AAEL001672	-0.574097	0.00964078
AAEL001673	-0.0050452	0.995457
AAEL001675	2.4585	0.306316
AAEL001676	0.217437	0.924303
AAEL001677	-0.445258	0.314763
AAEL001680	-0.0656367	0.945679
AAEL001682	-0.0245109	0.981672
AAEL001683	-0.159053	0.744928
AAEL001684	0.242117	0.885305
AAEL001685	0.312753	0.838785
AAEL001687	-0.284066	0.876585
AAEL001688	0.0721959	0.924581
AAEL001689	0.502867	0.547738
AAEL001692	-1.82648	7.63e-08
AAEL001695	0.184778	0.770382
AAEL001696	-0.510145	0.609188
AAEL001698	-0.00744682	0.992218
AAEL001699	-0.10666	0.841725
AAEL001702	0.859406	0.0475637
AAEL001704	-0.189974	0.692027
AAEL001707	0.211348	0.74802
AAEL001708	0.218513	0.820928
AAEL001709	-0.0453049	0.944487
AAEL001710	-0.26097	0.876585
AAEL001711	-0.145132	0.930898
AAEL001715	-0.126182	0.774311
AAEL001716	0.0697919	0.913479
AAEL001717	0.0300577	0.979145
AAEL001719	-0.541397	0.00238893
AAEL001721	0.278144	0.832452
AAEL001722	0.0605135	0.941812
AAEL001723	-0.170356	0.946386
AAEL001724	0.244608	0.887261
AAEL001725	-0.0951188	0.873737
AAEL001727	-0.397107	0.893441
AAEL001729	0.249245	0.717211
AAEL001730	0.360597	0.706053
AAEL001731	0.069341	0.958843
AAEL001738	0.0189519	0.980391
AAEL001739	-0.458686	0.220978
AAEL001742	-0.343829	0.294701
AAEL001744	-0.043111	0.955681
AAEL001745	0.179577	0.646923
AAEL001746	0.0217312	0.979145
AAEL001748	-0.327633	0.504261
AAEL001749	-0.130393	0.900981
AAEL001751	0.655395	0.00101495
AAEL001752	0.0172852	0.981672
AAEL001754	-0.260495	0.863964
AAEL001755	-0.156986	0.951067
AAEL001756	0.295161	0.502434
AAEL001757	0.381213	0.805038
AAEL001758	0.0991916	0.971439
AAEL001759	-0.157831	0.724819
AAEL001760	-0.221778	0.781133
AAEL001761	0.418743	0.174473
AAEL001764	0.0797432	0.940084
AAEL001765	-0.0624014	0.949328
AAEL001766	-0.148729	0.902828
AAEL001767	0.102575	0.901631
AAEL001769	-0.0730642	0.919427
AAEL001770	-0.0693254	0.924303
AAEL001776	-0.560232	0.63386
AAEL001777	-0.859784	0.463832
AAEL001778	0.0147659	0.990069
AAEL001779	0.0768027	0.89582
AAEL001780	0.0999172	0.913697
AAEL001782	-0.218089	0.691956
AAEL001785	-0.0816934	0.935217
AAEL001787	-0.0377916	0.958843
AAEL001789	-0.113374	0.958843
AAEL001791	-0.206009	0.615402
AAEL001792	-0.767934	2.26e-05
AAEL001795	0.0877089	0.881817
AAEL001796	-0.0766333	0.89288
AAEL001797	0.0659879	0.954361
AAEL001798	-0.237357	0.374628
AAEL001799	0.240196	0.640599
AAEL001800	0.37513	0.21649
AAEL001802	-1.1609	2.94e-06
AAEL001803	-0.147154	0.86104
AAEL001805	0.377618	0.749097
AAEL001808	0.136877	0.841725
AAEL001809	-0.083103	0.951648
AAEL001810	-0.139687	0.707812
AAEL001812	0.126271	0.888131
AAEL001813	-0.00447398	0.996006
AAEL001815	0.0514887	0.933861
AAEL001817	-0.0773016	0.911638
AAEL001818	0.194245	0.781133
AAEL001819	-0.176635	0.837686
AAEL001820	-0.395502	0.374628
AAEL001822	0.06451	0.946386
AAEL001824	0.076737	0.902434
AAEL001827	-0.192668	0.758458
AAEL001830	0.00885198	0.990113
AAEL001831	-0.3078	0.438613
AAEL001832	-0.00274195	0.997463
AAEL001833	0.457189	0.278391
AAEL001834	0.567411	0.741854
AAEL001835	-0.564037	0.199412
AAEL001838	-0.206783	0.713456
AAEL001840	-0.0654895	0.937728
AAEL001843	0.395543	0.854128
AAEL001845	0.44757	0.333835
AAEL001847	-0.406586	0.0471973
AAEL001848	-0.301446	0.440767
AAEL001850	0.0570176	0.93589
AAEL001851	-0.50098	0.0145106
AAEL001852	-0.467289	0.344167
AAEL001853	-0.23818	0.498761
AAEL001854	0.201224	0.805038
AAEL001856	-0.226116	0.571736
AAEL001858	-0.017244	0.985599
AAEL001859	0.101369	0.847975
AAEL001860	0.198841	0.719988
AAEL001861	-0.159363	0.702696
AAEL001863	1.05049	0.000385137
AAEL001864	-0.319247	0.145831
AAEL001865	0.290943	0.409244
AAEL001867	-0.366169	0.806972
AAEL001868	-0.566967	0.663099
AAEL001869	-0.20172	0.513141
AAEL001870	0.790034	0.0900729
AAEL001871	-0.0886693	0.919427
AAEL001872	0.233307	0.508134
AAEL001874	-0.108102	0.885305
AAEL001875	0.0385245	0.972693
AAEL001876	0.369891	0.247966
AAEL001878	0.368437	0.362568
AAEL001879	-0.160724	0.850904
AAEL001881	0.335345	0.81929
AAEL001883	-0.0491525	0.956448
AAEL001884	-0.294109	0.755309
AAEL001886	0.0420762	0.972693
AAEL001887	0.49434	0.0282596
AAEL001888	-0.142552	0.838708
AAEL001890	-0.153915	0.885068
AAEL001891	-0.242965	0.671475
AAEL001893	-0.165822	0.727704
AAEL001894	-0.913696	0.00580854
AAEL001896	-0.197359	0.514943
AAEL001897	0.745605	0.431482
AAEL001898	-0.301504	0.298825
AAEL001899	-0.303737	0.604313
AAEL001902	0.815752	0.285172
AAEL001903	0.456068	0.710852
AAEL001904	-0.114438	0.802755
AAEL001905	0.235122	0.856645
AAEL001906	0.0780851	0.882136
AAEL001909	0.256124	0.719373
AAEL001910	-0.211221	0.480986
AAEL001912	0.116834	0.902724
AAEL001913	0.0603664	0.91102
AAEL001914	0.0519533	0.962089
AAEL001915	-0.0686444	0.911638
AAEL001916	-0.288542	0.262297
AAEL001918	-0.0338101	0.965603
AAEL001919	-0.210043	0.602944
AAEL001920	-0.0546863	0.951648
AAEL001921	-0.077088	0.938074
AAEL001922	-0.231507	0.699107
AAEL001930	-0.219819	0.626965
AAEL001932	-0.266609	0.784726
AAEL001934	0.137422	0.906051
AAEL001935	-0.0711691	0.926571
AAEL001936	-0.152167	0.806972
AAEL001937	-0.0971482	0.901631
AAEL001938	-0.358408	0.204858
AAEL001939	-0.201286	0.627408
AAEL001940	0.00185262	0.997463
AAEL001942	-0.20723	0.797065
AAEL001943	0.283392	0.679208
AAEL001945	-0.216894	0.796619
AAEL001946	0.311201	0.410608
AAEL001948	-0.171669	0.789187
AAEL001950	0.165937	0.79122
AAEL001952	-0.108723	0.802376
AAEL001954	-0.209118	0.658333
AAEL001955	0.0345854	0.973402
AAEL001957	-0.147161	0.728304
AAEL001958	-0.884802	0.299639
AAEL001959	0.264717	0.360447
AAEL001962	-0.164357	0.839016
AAEL001963	0.292882	0.670046
AAEL001968	0.174592	0.691956
AAEL001971	0.188883	0.7896
AAEL001972	0.362753	0.438613
AAEL001973	0.00890046	0.997342
AAEL001974	0.276743	0.691956
AAEL001976	-0.541492	0.724624
AAEL001977	-0.0592258	0.939164
AAEL001978	0.689612	0.447807
AAEL001979	-0.018681	0.978714
AAEL001981	0.519425	0.237781
AAEL001982	-0.386096	0.585021
AAEL001983	-0.111911	0.912187
AAEL001984	0.146339	0.823827
AAEL001986	0.542968	0.506857
AAEL001992	-0.0746353	0.968487
AAEL001996	-0.0330501	0.96837
AAEL001997	-0.0798851	0.913479
AAEL001998	0.132619	0.80271
AAEL002002	0.167604	0.759709
AAEL002004	-0.757599	0.000425256
AAEL002006	-0.0788036	0.920152
AAEL002008	-0.106263	0.930135
AAEL002009	0.10665	0.855625
AAEL002010	-0.328669	0.346723
AAEL002012	-0.0146794	0.98332
AAEL002013	-0.419704	0.474885
AAEL002014	0.301951	0.480962
AAEL002016	0.120384	0.811419
AAEL002018	0.162207	0.803208
AAEL002019	-0.202365	0.601174
AAEL002020	0.175537	0.843995
AAEL002023	0.570845	0.000268124
AAEL002025	-0.216441	0.591244
AAEL002033	0.247102	0.887104
AAEL002036	-0.600048	0.0414303
AAEL002037	-0.0453598	0.970358
AAEL002039	0.570689	0.185464
AAEL002043	-0.162427	0.928492
AAEL002047	-0.02051	0.979078
AAEL002048	-0.0184066	0.978714
AAEL002050	0.0362482	0.980419
AAEL002054	-0.0341715	0.977557
AAEL002055	-0.313013	0.49919
AAEL002056	-0.085558	0.897485
AAEL002059	-0.10448	0.901355
AAEL002060	0.183158	0.745804
AAEL002061	0.0561783	0.922254
AAEL002062	0.115514	0.882136
AAEL002065	0.86232	0.0980605
AAEL002067	-1.338	0.0324453
AAEL002068	0.450059	0.604313
AAEL002069	0.0275867	0.977186
AAEL002070	-0.394304	0.446577
AAEL002071	0.248142	0.505313
AAEL002072	0.544661	0.274976
AAEL002074	0.152986	0.88698
AAEL002077	0.191999	0.66065
AAEL002078	-0.122389	0.859034
AAEL002079	-0.16044	0.754105
AAEL002080	0.520629	0.411061
AAEL002081	0.128787	0.75555
AAEL002082	-0.0796517	0.920394
AAEL002083	-0.0828336	0.86738
AAEL002084	0.150616	0.784726
AAEL002088	-0.0882362	0.903667
AAEL002089	0.04418	0.958843
AAEL002090	0.269254	0.894375
AAEL002091	0.241603	0.498761
AAEL002093	-0.0948413	0.97018
AAEL002097	0.221205	0.775643
AAEL002098	-0.32471	0.296989
AAEL002100	-0.639492	0.319843
AAEL002101	-0.20566	0.543786
AAEL002102	-0.280831	0.602366
AAEL002103	-0.355285	0.538989
AAEL002104	-0.548568	0.438613
AAEL002106	0.140982	0.885794
AAEL002107	-0.219737	0.618263
AAEL002108	0.338931	0.406819
AAEL002112	0.138297	0.873737
AAEL002113	0.435476	0.419962
AAEL002114	-0.0733354	0.930135
AAEL002115	-0.374206	0.213483
AAEL002116	0.0270232	0.980391
AAEL002117	0.653878	0.236276
AAEL002118	-0.307293	0.174473
AAEL002119	0.641294	0.00462095
AAEL002120	0.29535	0.913479
AAEL002121	0.247733	0.647967
AAEL002122	0.113565	0.941652
AAEL002123	-0.235911	0.50611
AAEL002124	0.0761167	0.917016
AAEL002125	-0.237937	0.831489
AAEL002126	0.24196	0.814376
AAEL002127	-0.217092	0.894679
AAEL002129	-0.00498163	0.996006
AAEL002130	-0.626526	0.173589
AAEL002133	0.0844576	0.897991
AAEL002134	0.141509	0.849537
AAEL002135	-0.027916	0.977186
AAEL002136	0.291586	0.896595
AAEL002137	0.0305272	0.972693
AAEL002139	0.163692	0.80271
AAEL002141	-0.327009	0.38526
AAEL002142	-0.675407	0.37366
AAEL002144	-0.00637612	0.996006
AAEL002145	-0.102618	0.827944
AAEL002146	0.487968	0.540693
AAEL002148	0.212867	0.740641
AAEL002151	-0.220335	0.78348
AAEL002152	-0.129732	0.775292
AAEL002153	-0.126989	0.89709
AAEL002154	-0.185234	0.691956
AAEL002155	-0.000725933	0.998477
AAEL002157	-0.119372	0.81929
AAEL002158	-0.48092	0.629671
AAEL002159	0.0670058	0.979309
AAEL002160	-0.180098	0.569273
AAEL002161	0.0812716	0.911715
AAEL002162	0.0535421	0.972643
AAEL002163	-0.0396947	0.946386
AAEL002164	-0.0212283	0.985416
AAEL002165	0.238093	0.669167
AAEL002166	-0.321874	0.472944
AAEL002168	-0.0178947	0.986379
AAEL002169	-0.314909	0.753733
AAEL002170	0.0130546	0.987293
AAEL002171	0.0591853	0.958843
AAEL002173	-0.130105	0.941652
AAEL002174	-1.03162	0.48336
AAEL002175	0.336565	0.215341
AAEL002179	-0.0843131	0.922493
AAEL002182	-0.203881	0.570987
AAEL002183	-0.0121312	0.990069
AAEL002184	0.136559	0.843989
AAEL002186	0.00692043	0.994486
AAEL002190	-0.300675	0.284152
AAEL002191	-0.0971278	0.922423
AAEL002192	-0.589923	0.654283
AAEL002194	-0.248957	0.599077
AAEL002195	-0.0132545	0.990113
AAEL002198	-0.211643	0.711448
AAEL002203	0.326117	0.509073
AAEL002205	0.135877	0.877568
AAEL002206	-0.340276	0.577284
AAEL002207	0.121725	0.839643
AAEL002209	0.00950346	0.992218
AAEL002214	-0.0607152	0.941812
AAEL002215	-0.0158932	0.983667
AAEL002216	0.00836605	0.990069
AAEL002217	0.5541	0.632857
AAEL002219	-0.362863	0.519997
AAEL002221	0.374841	0.484076
AAEL002222	0.0853311	0.898174
AAEL002225	0.242185	0.793719
AAEL002226	0.00975334	0.992218
AAEL002229	0.252658	0.61057
AAEL002230	0.172389	0.802605
AAEL002231	0.0690934	0.919427
AAEL002232	-0.00138463	0.99859
AAEL002235	-0.0947486	0.856645
AAEL002236	0.128035	0.843989
AAEL002238	0.00785957	0.994001
AAEL002240	-0.249919	0.70743
AAEL002243	0.887349	1.3e-05
AAEL002244	-0.126345	0.888959
AAEL002245	1.30398	3.04e-11
AAEL002248	-0.112618	0.855869
AAEL002249	0.00260902	0.997031
AAEL002250	0.0219529	0.980391
AAEL002251	-0.0230648	0.981672
AAEL002252	-1.42543	0.659673
AAEL002253	0.266189	0.696774
AAEL002254	-0.400856	0.368338
AAEL002255	0.676023	0.379069
AAEL002256	0.569329	0.407392
AAEL002257	0.402014	0.65431
AAEL002258	-0.0842411	0.910948
AAEL002259	-0.512564	0.764726
AAEL002260	-0.0986975	0.854128
AAEL002261	-0.540935	0.000510469
AAEL002265	0.277094	0.763965
AAEL002268	0.671839	0.491521
AAEL002269	-0.440321	0.0227849
AAEL002271	-0.0168912	0.98332
AAEL002272	-0.172032	0.731592
AAEL002273	0.535782	0.0963097
AAEL002276	-0.626407	0.314389
AAEL002277	-0.227796	0.809109
AAEL002280	0.179311	0.719373
AAEL002282	0.0034979	0.997031
AAEL002284	0.354671	0.653256
AAEL002286	0.206127	0.893441
AAEL002286	0.0882773	0.91845
AAEL002287	0.0848153	0.885794
AAEL002290	0.0683346	0.906615
AAEL002292	0.126725	0.885068
AAEL002293	-0.163384	0.875646
AAEL002294	-0.176438	0.722599
AAEL002295	0.408504	0.57558
AAEL002296	0.144113	0.722599
AAEL002298	0.166998	0.848828
AAEL002299	0.0173739	0.979145
AAEL002301	-0.282195	0.477413
AAEL002302	0.638715	0.127807
AAEL002303	-0.185603	0.802376
AAEL002304	0.0884261	0.91845
AAEL002305	0.95882	0.103292
AAEL002306	-0.136125	0.876585
AAEL002307	0.175239	0.687167
AAEL002308	0.219284	0.744662
AAEL002309	1.61345	1.26e-24
AAEL002310	-0.30311	0.756187
AAEL002311	0.0698807	0.964401
AAEL002312	0.257807	0.594624
AAEL002316	0.0762198	0.959814
AAEL002317	0.33242	0.547287
AAEL002318	0.235173	0.706053
AAEL002319	-0.0896494	0.901355
AAEL002320	0.577739	0.642713
AAEL002321	0.232769	0.699107
AAEL002322	0.0109432	0.990069
AAEL002323	-0.033235	0.968918
AAEL002329	-0.196439	0.820928
AAEL002330	0.155102	0.954543
AAEL002334	-0.263357	0.319843
AAEL002335	0.0808578	0.908013
AAEL002336	-0.305161	0.75773
AAEL002337	-0.0813074	0.922423
AAEL002339	-0.279428	0.596799
AAEL002340	0.539567	0.521875
AAEL002341	-0.181655	0.734409
AAEL002343	-0.793083	0.488538
AAEL002345	-0.578031	0.503286
AAEL002346	0.118149	0.836819
AAEL002348	-0.246304	0.450279
AAEL002349	-0.0515099	0.928834
AAEL002351	-0.131691	0.740641
AAEL002352	0.456844	0.558489
AAEL002354	0.422365	0.131171
AAEL002357	0.339432	0.486165
AAEL002359	0.0269493	0.972693
AAEL002362	0.332133	0.570865
AAEL002363	0.197017	0.738405
AAEL002365	-1.919	0.0145319
AAEL002366	-0.0693189	0.941812
AAEL002367	0.0534405	0.951648
AAEL002369	0.00834118	0.994001
AAEL002370	-0.348888	0.236826
AAEL002371	0.172441	0.852564
AAEL002372	0.046219	0.955681
AAEL002374	-0.0143492	0.984973
AAEL002375	-0.0230145	0.979145
AAEL002376	-0.0153713	0.983361
AAEL002377	0.469558	0.212138
AAEL002381	0.804153	0.0696844
AAEL002382	-0.123557	0.888992
AAEL002384	0.148273	0.811729
AAEL002385	-0.110948	0.853951
AAEL002386	0.034778	0.960684
AAEL002387	-0.207463	0.710852
AAEL002389	0.287802	0.694812
AAEL002390	0.60337	0.437232
AAEL002390	-0.931834	6.71e-09
AAEL002392	-0.471192	0.503286
AAEL002394	-0.116443	0.974813
AAEL002395	0.277935	0.56233
AAEL002397	0.127656	0.949328
AAEL002398	0.551382	0.78348
AAEL002399	0.181235	0.689007
AAEL002401	0.0536196	0.938074
AAEL002402	-0.0463729	0.965603
AAEL002403	0.121036	0.928834
AAEL002404	-0.0618974	0.946386
AAEL002406	0.403644	0.616421
AAEL002407	-0.175404	0.596799
AAEL002408	-0.0879211	0.941684
AAEL002409	0.0385548	0.98332
AAEL002411	0.100512	0.811595
AAEL002412	0.0330129	0.96837
AAEL002415	0.200902	0.714751
AAEL002416	0.158838	0.714751
AAEL002417	-0.163108	0.618263
AAEL002418	-0.235549	0.807073
AAEL002419	0.106281	0.873747
AAEL002420	0.161652	0.704128
AAEL002423	-0.126082	0.882067
AAEL002426	0.236045	0.626716
AAEL002427	0.0870639	0.880793
AAEL002430	0.500657	0.231888
AAEL002432	-0.0468876	0.952415
AAEL002433	-0.465468	0.0197319
AAEL002435	-0.118314	0.784726
AAEL002436	-0.104134	0.80271
AAEL002437	-0.198445	0.62356
AAEL002438	0.068051	0.951648
AAEL002439	0.828664	0.322119
AAEL002440	-0.506886	0.809109
AAEL002444	-0.490884	0.463479
AAEL002446	0.235787	0.726904
AAEL002448	0.0117714	0.992038
AAEL002449	0.840195	0.524281
AAEL002450	0.0608006	0.942952
AAEL002451	0.224753	0.781133
AAEL002452	-0.00200227	0.998155
AAEL002455	-0.0882595	0.93589
AAEL002456	0.276374	0.759113
AAEL002457	0.0593489	0.954304
AAEL002459	0.469663	0.547287
AAEL002461	0.00939762	0.996147
AAEL002462	0.0375983	0.972693
AAEL002463	-0.815012	0.601174
AAEL002464	0.186859	0.663322
AAEL002465	0.0732332	0.912332
AAEL002468	0.178518	0.755309
AAEL002469	0.0298891	0.9708
AAEL002470	-0.797725	0.566447
AAEL002471	-0.273503	0.618263
AAEL002473	-0.207451	0.838375
AAEL002474	0.3058	0.522049
AAEL002475	-0.0172422	0.979145
AAEL002478	-0.158588	0.811419
AAEL002480	0.0783013	0.888635
AAEL002483	-0.304071	0.316064
AAEL002486	0.448551	0.434447
AAEL002487	-0.0433806	0.98332
AAEL002488	0.0443694	0.956448
AAEL002489	0.69642	0.0485114
AAEL002491	-0.639288	0.677364
AAEL002493	-0.267614	0.901631
AAEL002496	1.08765	0.439738
AAEL002498	-0.134208	0.913479
AAEL002499	0.590491	0.493615
AAEL002500	0.143984	0.94289
AAEL002501	-0.0934715	0.902434
AAEL002502	0.472774	0.478366
AAEL002503	0.257552	0.68208
AAEL002504	0.221145	0.600891
AAEL002508	0.0629619	0.930605
AAEL002510	0.235374	0.733138
AAEL002511	0.442043	0.23512
AAEL002512	0.465281	0.371914
AAEL002513	0.439452	0.794906
AAEL002514	-0.019715	0.979078
AAEL002517	0.516509	0.651848
AAEL002518	-0.580766	0.482985
AAEL002519	-0.186326	0.921288
AAEL002520	0.324649	0.881817
AAEL002521	-0.483558	0.736123
AAEL002522	0.140907	0.88698
AAEL002523	-0.0104296	0.991349
AAEL002524	-0.759764	0.220728
AAEL002525	-0.00159731	0.997463
AAEL002526	0.33681	0.423404
AAEL002527	0.34712	0.803757
AAEL002528	0.488972	0.517811
AAEL002529	0.523018	0.211829
AAEL002531	0.387926	0.531314
AAEL002532	-0.0123981	0.986621
AAEL002533	-0.379654	0.265378
AAEL002534	-0.069454	0.930072
AAEL002536	-0.0491579	0.938074
AAEL002538	0.0458746	0.947101
AAEL002539	0.148479	0.810069
AAEL002540	0.129415	0.837644
AAEL002542	0.218322	0.731257
AAEL002543	0.114883	0.849537
AAEL002544	0.0574942	0.930898
AAEL002545	0.57601	0.647276
AAEL002546	-0.0122719	0.990069
AAEL002547	0.206207	0.745804
AAEL002548	-0.108835	0.813222
AAEL002549	0.275616	0.84708
AAEL002550	-0.162118	0.729742
AAEL002551	-0.429346	0.359725
AAEL002554	-0.553012	0.601174
AAEL002555	0.447317	0.374628
AAEL002556	-0.0256728	0.972693
AAEL002557	-0.16811	0.657754
AAEL002558	1.01027	0.781085
AAEL002559	-0.136202	0.784726
AAEL002560	0.197073	0.606919
AAEL002562	0.293208	0.903288
AAEL002563	-0.0350905	0.956892
AAEL002565	0.440384	0.211829
AAEL002567	0.0708468	0.952578
AAEL002569	-0.27414	0.813222
AAEL002570	-0.0515721	0.972693
AAEL002571	-0.246997	0.571179
AAEL002572	-0.286817	0.247054
AAEL002574	0.387502	0.150795
AAEL002575	0.603477	0.65214
AAEL002576	-0.0258285	0.97501
AAEL002578	-0.182688	0.609188
AAEL002581	-0.0877766	0.901355
AAEL002582	0.264787	0.871469
AAEL002583	0.111161	0.901631
AAEL002587	0.249099	0.799108
AAEL002588	-0.091983	0.891869
AAEL002590	0.0516748	0.966533
AAEL002592	0.262457	0.839643
AAEL002593	0.379937	0.252689
AAEL002594	0.146565	0.832687
AAEL002595	-0.0820141	0.948518
AAEL002597	0.0602544	0.922423
AAEL002599	0.0350735	0.976099
AAEL002600	-0.682254	0.425192
AAEL002601	-0.797609	0.0380071
AAEL002607	0.53011	0.0552419
AAEL002608	0.00584116	0.996707
AAEL002611	0.468926	0.479184
AAEL002612	-0.457076	0.274976
AAEL002613	0.385092	0.275065
AAEL002614	0.111998	0.930324
AAEL002615	-0.0138258	0.992203
AAEL002616	-0.0798754	0.956892
AAEL002621	-0.0392758	0.967826
AAEL002622	0.0756882	0.91845
AAEL002624	-0.386326	0.211618
AAEL002625	-0.0835062	0.865676
AAEL002627	-0.417717	0.0272897
AAEL002628	-0.206172	0.745795
AAEL002629	0.0504618	0.927494
AAEL002630	0.0129111	0.98582
AAEL002632	-0.107819	0.924303
AAEL002636	0.0173799	0.980391
AAEL002637	-0.512006	0.801014
AAEL002639	-0.104882	0.864941
AAEL002640	0.160091	0.845395
AAEL002641	0.754592	0.696285
AAEL002642	0.385907	0.878031
AAEL002644	0.0535619	0.941812
AAEL002645	-0.175034	0.626716
AAEL002646	-0.0396384	0.946386
AAEL002647	0.0995514	0.919427
AAEL002651	-0.208893	0.696341
AAEL002652	0.199129	0.901355
AAEL002653	0.0361716	0.977682
AAEL002657	-0.74366	0.00422361
AAEL002658	0.750791	0.509785
AAEL002659	-0.081185	0.930222
AAEL002660	0.212105	0.638512
AAEL002661	-1.40051	0.144103
AAEL002662	0.901575	0.0090545
AAEL002663	-0.07785	0.936823
AAEL002665	-0.41293	0.461842
AAEL002667	-0.335714	0.766684
AAEL002668	-0.161604	0.79474
AAEL002669	-0.00413366	0.994521
AAEL002672	-0.294626	0.503799
AAEL002673	0.435966	0.0205068
AAEL002675	-0.234252	0.548261
AAEL002678	0.163942	0.796384
AAEL002680	-0.0892605	0.892261
AAEL002682	-0.417052	0.187422
AAEL002684	-0.00249531	0.997463
AAEL002687	-0.251721	0.39905
AAEL002688	0.674977	0.0136812
AAEL002690	0.362873	0.611105
AAEL002691	0.0767126	0.93153
AAEL002692	0.0909896	0.91845
AAEL002694	0.0156276	0.984719
AAEL002698	-0.260942	0.452389
AAEL002699	0.472888	0.729061
AAEL002700	-0.167822	0.647276
AAEL002701	0.314099	0.503286
AAEL002703	-0.258324	0.707646
AAEL002705	0.170459	0.712908
AAEL002706	-0.0844442	0.944487
AAEL002709	0.399694	0.647978
AAEL002711	0.000626646	0.999119
AAEL002712	0.12933	0.913479
AAEL002714	-0.294442	0.533845
AAEL002716	-0.275141	0.771456
AAEL002718	-0.2417	0.566447
AAEL002719	-0.239377	0.565968
AAEL002720	0.949178	0.0980605
AAEL002721	-0.143701	0.825617
AAEL002723	0.322423	0.524281
AAEL002724	-0.319455	0.869303
AAEL002725	1.20706	4.06e-07
AAEL002727	-0.149779	0.92866
AAEL002728	-0.0593129	0.94289
AAEL002729	-0.256945	0.524281
AAEL002731	0.508051	0.163319
AAEL002733	0.232505	0.700813
AAEL002735	-0.0890986	0.926866
AAEL002736	-0.0847652	0.907396
AAEL002740	0.117963	0.879022
AAEL002741	-0.5963	0.632857
AAEL002742	0.00230934	0.998648
AAEL002750	-0.0378182	0.972693
AAEL002751	-0.0907232	0.87983
AAEL002752	0.126313	0.865885
AAEL002754	-0.129086	0.949328
AAEL002756	-0.338301	0.78348
AAEL002758	-0.192046	0.718878
AAEL002759	-0.147044	0.675161
AAEL002760	0.0376532	0.956892
AAEL002761	0.152279	0.641169
AAEL002764	0.622157	0.313834
AAEL002765	-0.148548	0.926866
AAEL002766	-0.0783374	0.917659
AAEL002767	-0.524203	0.338338
AAEL002769	-0.0442879	0.957119
AAEL002770	0.631117	0.50611
AAEL002771	-0.324836	0.310901
AAEL002772	0.0831364	0.932141
AAEL002774	0.373653	0.193422
AAEL002775	0.14713	0.845395
AAEL002776	0.29422	0.352498
AAEL002777	0.308592	0.593853
AAEL002781	-0.0787968	0.930898
AAEL002782	-0.269625	0.544151
AAEL002783	0.814026	0.275546
AAEL002784	-0.061355	0.930222
AAEL002785	0.0229368	0.983361
AAEL002786	0.0653885	0.970396
AAEL002787	0.086476	0.958843
AAEL002788	-0.397445	0.219587
AAEL002789	-0.0152739	0.984766
AAEL002790	0.143377	0.875957
AAEL002791	0.285564	0.507263
AAEL002793	0.480592	0.61057
AAEL002794	0.387002	0.336791
AAEL002795	0.198823	0.924581
AAEL002796	0.274903	0.5436
AAEL002797	-0.0718697	0.96837
AAEL002798	0.274017	0.567697
AAEL002800	0.326639	0.771456
AAEL002801	0.153016	0.913042
AAEL002802	0.087074	0.919427
AAEL002803	0.163574	0.802441
AAEL002804	0.0091852	0.992896
AAEL002805	0.00248729	0.997031
AAEL002808	-0.0559979	0.928834
AAEL002809	0.408674	0.440612
AAEL002810	-0.364863	0.294157
AAEL002812	0.613443	0.360447
AAEL002813	0.0996451	0.845615
AAEL002814	0.507077	0.514202
AAEL002815	-0.0350201	0.96389
AAEL002817	-0.00952723	0.986621
AAEL002818	-0.312089	0.287742
AAEL002819	0.028519	0.98332
AAEL002820	0.0922878	0.936019
AAEL002822	-0.281053	0.558489
AAEL002823	0.140757	0.839643
AAEL002824	-0.0558326	0.955681
AAEL002825	0.160506	0.767104
AAEL002827	0.350015	0.838375
AAEL002828	-0.0615798	0.947101
AAEL002829	0.0493665	0.958843
AAEL002830	-0.172737	0.88698
AAEL002831	0.151967	0.937728
AAEL002832	-0.0450524	0.949328
AAEL002833	-0.0427506	0.939164
AAEL002834	-0.342358	0.112946
AAEL002835	-0.0523102	0.93206
AAEL002836	-0.00782422	0.992218
AAEL002837	0.241816	0.604507
AAEL002839	-0.287298	0.855869
AAEL002840	-0.0575508	0.93063
AAEL002841	0.227547	0.604313
AAEL002842	0.0110869	0.990256
AAEL002843	0.276071	0.469786
AAEL002844	0.0144064	0.98582
AAEL002846	0.115707	0.873061
AAEL002847	0.11854	0.912332
AAEL002848	0.230118	0.626078
AAEL002849	-0.0638968	0.977186
AAEL002850	-0.079967	0.936019
AAEL002851	0.158117	0.845292
AAEL002852	0.381823	0.724819
AAEL002853	0.701303	0.0772968
AAEL002854	0.157765	0.942701
AAEL002856	0.242763	0.525864
AAEL002858	0.345586	0.567063
AAEL002860	-0.411541	0.0185558
AAEL002861	0.0914196	0.971809
AAEL002862	0.343328	0.524281
AAEL002863	-0.224675	0.662788
AAEL002864	-0.0366291	0.958617
AAEL002866	-0.155407	0.62356
AAEL002867	-0.00344419	0.996147
AAEL002868	-0.342506	0.795796
AAEL002869	0.0392694	0.964862
AAEL002870	-0.00747335	0.990753
AAEL002871	-0.204092	0.688829
AAEL002873	0.130183	0.942952
AAEL002874	0.399222	0.70793
AAEL002875	0.166588	0.68325
AAEL002876	-0.361548	0.818881
AAEL002877	0.150971	0.826489
AAEL002879	-0.377051	0.786744
AAEL002880	0.516521	0.520148
AAEL002881	0.300646	0.381034
AAEL002882	0.128669	0.842938
AAEL002883	0.604712	0.566792
AAEL002885	0.0438486	0.952578
AAEL002886	-0.044045	0.93589
AAEL002887	0.328804	0.277842
AAEL002888	0.204404	0.602944
AAEL002890	-0.035223	0.95892
AAEL002891	-0.0455954	0.961114
AAEL002892	-0.273314	0.514202
AAEL002893	0.198114	0.891953
AAEL002895	0.301543	0.671956
AAEL002896	-0.00623453	0.994521
AAEL002898	0.476914	0.696556
AAEL002900	0.127103	0.853079
AAEL002902	0.46619	0.437232
AAEL002903	-0.139525	0.872974
AAEL002904	0.164616	0.897767
AAEL002906	0.333527	0.442065
AAEL002909	0.895326	0.0139489
AAEL002910	-0.2788	0.330876
AAEL002912	0.0371858	0.967826
AAEL002913	0.0542373	0.928834
AAEL002915	-0.776403	0.0282596
AAEL002917	-0.341256	0.543786
AAEL002918	-0.918706	0.236491
AAEL002919	0.156832	0.929888
AAEL002921	0.479139	0.647276
AAEL002922	0.518128	0.714591
AAEL002924	-0.357986	0.0866342
AAEL002925	0.0164448	0.98582
AAEL002930	-0.451605	0.325421
AAEL002931	-0.462122	0.874311
AAEL002933	-0.0171959	0.980391
AAEL002934	-0.113261	0.859034
AAEL002935	-0.264421	0.661719
AAEL002936	-0.202003	0.696285
AAEL002938	-0.173335	0.638512
AAEL002939	-0.0582355	0.961884
AAEL002941	0.206803	0.900677
AAEL002943	0.129388	0.806972
AAEL002944	-0.040214	0.958843
AAEL002945	-0.625493	0.561943
AAEL002946	0.611499	0.48641
AAEL002947	-0.339098	0.772735
AAEL002948	-0.133158	0.908793
AAEL002950	0.30064	0.252279
AAEL002953	-0.0699681	0.926866
AAEL002962	1.49778	0.294198
AAEL002963	-0.17607	0.566447
AAEL002967	0.026129	0.98332
AAEL002968	-0.248486	0.774786
AAEL002969	-0.469892	0.222403
AAEL002971	0.0123045	0.985008
AAEL002972	0.281354	0.556598
AAEL002973	-0.444145	0.463135
AAEL002974	0.0878342	0.968799
AAEL002978	-0.22495	0.525864
AAEL002979	0.13139	0.886411
AAEL002982	0.86213	0.296777
AAEL002983	0.160721	0.78348
AAEL002984	-0.960067	0.60859
AAEL002986	0.035418	0.972693
AAEL002987	-0.0611826	0.928492
AAEL002988	0.466701	0.394176
AAEL002989	0.402806	0.202188
AAEL002993	0.234603	0.636966
AAEL002994	0.156839	0.890615
AAEL002995	-0.0278477	0.986881
AAEL002996	0.0100321	0.992563
AAEL002997	0.793238	0.268997
AAEL002998	-0.209245	0.689007
AAEL002999	0.160923	0.745795
AAEL003000	0.405125	0.736114
AAEL003001	0.164113	0.789166
AAEL003002	0.127643	0.958843
AAEL003003	0.487167	0.659673
AAEL003004	-0.0781559	0.973828
AAEL003005	0.0487583	0.944912
AAEL003006	0.0969398	0.862667
AAEL003008	-0.120553	0.863261
AAEL003009	0.318211	0.590135
AAEL003011	0.229447	0.767789
AAEL003013	0.0722501	0.951648
AAEL003014	0.496715	0.521875
AAEL003015	-0.800533	0.532085
AAEL003017	0.050646	0.958843
AAEL003018	-6.01e-06	0.999956
AAEL003019	0.505405	0.374099
AAEL003020	0.741807	0.674796
AAEL003022	0.25733	0.485301
AAEL003025	-0.0275702	0.990069
AAEL003026	-0.166809	0.941812
AAEL003027	0.575994	0.000756312
AAEL003030	0.0358528	0.973828
AAEL003032	-0.065487	0.93589
AAEL003034	0.189123	0.732951
AAEL003036	-0.498593	0.331892
AAEL003038	-0.434109	0.173589
AAEL003039	-0.329049	0.206818
AAEL003040	0.21566	0.900783
AAEL003041	0.239732	0.425192
AAEL003043	0.114829	0.894712
AAEL003044	-0.0331351	0.980825
AAEL003046	-0.116186	0.837686
AAEL003047	-2.96237	0.0579789
AAEL003048	0.208286	0.705562
AAEL003049	-0.226733	0.429677
AAEL003051	-0.108444	0.825617
AAEL003052	-0.243419	0.903049
AAEL003055	-0.165753	0.611978
AAEL003059	-0.0626684	0.961253
AAEL003061	-0.850246	0.49005
AAEL003063	0.0278495	0.984703
AAEL003064	-0.104433	0.806972
AAEL003065	0.136772	0.868114
AAEL003067	-0.412278	0.223127
AAEL003070	0.440366	0.184506
AAEL003071	-0.296473	0.204328
AAEL003073	0.164639	0.818881
AAEL003075	-0.0581338	0.927368
AAEL003077	0.0110124	0.991538
AAEL003078	-0.657489	0.547737
AAEL003083	-0.31045	0.682382
AAEL003085	-0.406106	0.50611
AAEL003087	0.19849	0.791442
AAEL003088	-0.439552	0.698166
AAEL003089	-0.099569	0.876585
AAEL003092	0.476912	0.679484
AAEL003093	0.348125	0.231784
AAEL003097	-0.422088	0.391075
AAEL003098	0.833457	0.490148
AAEL003099	0.335824	0.157531
AAEL003100	0.242266	0.900783
AAEL003101	-0.570122	0.843356
AAEL003102	0.19627	0.810069
AAEL003103	-0.390787	0.0374419
AAEL003104	0.319597	0.770791
AAEL003105	-0.00624689	0.992563
AAEL003106	0.103359	0.862513
AAEL003107	-0.0454517	0.984973
AAEL003108	-0.140611	0.781085
AAEL003109	-0.0601139	0.941684
AAEL003112	0.762994	0.566447
AAEL003113	-0.191886	0.837686
AAEL003115	0.128858	0.88077
AAEL003116	-0.405767	0.0647799
AAEL003117	-0.24115	0.520148
AAEL003119	-0.364445	0.686078
AAEL003121	0.362953	0.694962
AAEL003122	0.560857	0.28432
AAEL003125	-0.0189662	0.979145
AAEL003126	-0.470776	0.0282596
AAEL003128	0.542793	0.0312936
AAEL003129	0.0113686	0.991538
AAEL003130	-0.186483	0.772633
AAEL003131	0.00565011	0.997463
AAEL003133	0.0573007	0.954543
AAEL003134	0.0511221	0.979309
[truncated: 8,559 more rows]
