# Supplementary material for: Juvenile Hormone III but Not 20-Hydroxyecdysone Regulates the Embryonic Diapause of Aedes albopictus
Source: Front Physiol. 2019 Oct 25;10:1352. doi: 10.3389/fphys.2019.01352 (PMC6823934; doi:10.3389/fphys.2019.01352)
Supplement: Supplementary file 2 [file Data_Sheet_2.xlsx]

## Sheet: Diapause Incidence
Supplementary Dataset 2. Diapause incidence measurements for eggs generated under short-day (SD) and long-day (LD) photoperiods
Photoperiod	Replicate	Collection Date	Egg Count	Hatch 1 Date	Hatch 1 Count	Hatch 2 Date	Hatch 2 Count	Bleach date	Embryonated Unhatched	Unembryonated	%DI
LD	1	2019-05-07	133	2019-05-19	54	2019-05-23	61	2019-05-24	6	10	0.0488
LD	3	2019-05-07	115	2019-05-19	70	2019-05-23	33	2019-05-24	4	5	0.0364
SD	1	2019-05-07	120	2019-05-19	0	2019-05-23	5	2019-05-24	105	13	0.9813
SD	2	2019-05-07	107	2019-05-19	0	2019-05-23	0	2019-05-24	95	10	0.9794
SD	3	2019-05-07	183	2019-05-19	6	2019-05-23	6	2019-05-24	163	20	1
SD	1	2019-06-22	95	2019-07-08	0	2019-07-15	0	2019-07-17	89	3	0.9674
SD	2	2019-06-22	265	2019-07-08	1	2019-07-15	3	2019-07-17	233	15	0.932
SD	3	2019-06-22	285	2019-07-08	0	2019-07-15	1	2019-07-17	253	18	0.9476
SD	4	2019-06-22	192	2019-07-08	1	2019-07-15	1	2019-07-17	174	12	0.9667
SD	5	2019-06-22	126	2019-07-08	2	2019-07-15	0	2019-07-17	115	6	0.9583
SD	6	2019-06-22	229	2019-07-08	1	2019-07-15	0	2019-07-17	202	15	0.9439
SD	7	2019-06-22	175	2019-07-08	0	2019-07-15	0	2019-07-17	158	11	0.9634
SD	8	2019-06-22	185	2019-07-08	1	2019-07-15	0	2019-07-17	173	6	0.9665
SD	9	2019-06-25	185	2019-07-08	0	2019-07-15	0	2019-07-17	165	12	0.9538
SD	10	2019-06-25	260	2019-07-08	3	2019-07-15	2	2019-07-17	229	21	0.9582
SD	11	2019-06-25	177	2019-07-08	1	2019-07-15	2	2019-07-17	152	9	0.9048
LD	4	2019-06-21	136	2019-07-08	31	2019-07-15	95	2019-07-17	6	3	0.0451
LD	5	2019-06-21	117	2019-07-08	12	2019-07-15	80	2019-07-17	9	5	0.0804
LD	6	2019-06-21	84	2019-07-08	20	2019-07-15	43	2019-07-17	7	9	0.0933
LD	7	2019-06-21	177	2019-07-08	28	2019-07-15	125	2019-07-17	7	13	0.0427
LD	8	2019-06-21	53	2019-07-08	17	2019-07-15	30	2019-07-17	1	5	0.0208
LD	9	2019-06-23	262	2019-07-08	130	2019-07-15	100	2019-07-17	18	9	0.0711
LD	10	2019-06-23	88	2019-07-08	27	2019-07-15	41	2019-07-17	7	4	0.0833
LD	11	2019-06-23	225	2019-07-08	72	2019-07-15	139	2019-07-17	4	4	0.0181
Photoperiod	Mean DI	Min DI	Max DI
LD	0.054	0.0181	0.0933
SD	0.9588	0.9048	1
