# Supplementary material for: Juvenile Hormone III but Not 20-Hydroxyecdysone Regulates the Embryonic Diapause of Aedes albopictus
Source: Front Physiol. 2019 Oct 25;10:1352. doi: 10.3389/fphys.2019.01352 (PMC6823934; doi:10.3389/fphys.2019.01352)
Supplement: Supplementary file 3 [file Data_Sheet_3.xlsx]

## Sheet: 20-HE
Supplementary Dataset 3. Quantification of 20-hydroxyecdysone (20HE) and juvenile hormone III (JH3) abundance in diapause and non-diapause eggs
Sample	Age (dpov)	Run Date	RT	Peak Area	20HE Eq (pg)	Egg Mass (mg)	20HE Eq (pg/mg)	Average	N		S	Short Day (Diapause)
L9	5	2018-10-12	2.88	18.29	768.18	10.2	75.3118	38.1935	7		L	Long Day (Non-Diapause)
L10	5	2018-10-16	NO PEAK			9.5
L12	5	2018-10-10	2.86	6.35	266.7	9.9	26.9394
L21	5	2018-10-09	2.88	5.77	242.34	8.5	28.5106				Positive Control Areas			5000 pg injected
L22	5	2018-10-16	NO PEAK			10.4					2018-10-03	126.88
L25	5	2018-10-17	NO PEAK			10.4					2018-10-09	110.42
L26	5	2018-10-18	NO PEAK			13.6					2018-10-12	167.08
L31	5	2018-10-09	2.88	8.83	370.86	10.5	35.32				2018-10-16	106.1
L32	5	2018-10-10	2.84	1.12	47.04	9.1	5.16923				2018-10-17	75.64
L34	5	2018-10-18	2.88	6.53	274.26	10.6	25.8736				2018-10-18	141.49
L55	5	2018-10-19	NO PEAK			9.8					2018-10-19	108.67
L56	5	2018-10-19	2.89	23.41	983.22	14	70.23							pg/unit area
											Average	119.469		41.852
S4	5	2018-10-12	NO PEAK			11		44.9987	5
S5	5	2018-10-16	2.89	23.87	1002.54	15.2	65.9566
S7	5	2018-10-17	2.86	11.83	496.86	10.7	46.4355
S8	5	2018-10-18	2.89	11.58	486.36	10.1	48.1545
S12	5	2018-10-09	2.86	12.35	518.7	9.7	53.4742
S15	5	2018-10-16	NO PEAK			9.3
S16	5	2018-10-12	NO PEAK			11
S17	5	2018-10-10	2.84	2.9	121.8	11.1	10.973
S20	5	2018-10-17	NO PEAK			11.9
S21	5	2018-10-18	NO PEAK			11.3
S23	5	2018-10-10	NO PEAK			14
S24	5	2018-10-19	NO PEAK			10.7
L5	7	2018-10-17	2.85	3.26	136.92	10.2	13.4235	46.3175	8
L6	7	2018-10-17	2.84	3.18	133.56	10.1	13.2238
L8	7	2018-10-17	NO PEAK			12.6
L13	7	2018-10-12	2.88	5.58	234.36	10.3	22.7534
L14	7	2018-10-09	2.88	16.5	693	10.9	63.578
L15	7	2018-10-19	2.89	12.05	506.1	9.7	52.1753
L16	7	2018-10-10	NO PEAK			10.4
L17	7	2018-10-16	2.84	6.61	277.62	12.2	22.7557
L18	7	2018-10-16	NO PEAK			12.8
L19	7	2018-10-12	2.85	19.78	830.76	12	69.23
L23	7	2018-10-10	NO PEAK			9.7
L24	7	2018-10-18	2.89	26.19	1099.98	9.7	113.4
S2	7	2018-10-17	2.91	21.03	883.26	10.2	86.5941	53.6401	9
S3	7	2018-10-10	2.87	6.99	293.58	10.3	28.5029
S9	7	2018-10-17	2.87	2.93	123.06	11	11.1873
S10	7	2018-10-16	2.89	13.67	574.14	10	57.414
S13	7	2018-10-16	2.89	9.93	417.06	10.2	40.8882
S14	7	2018-10-09	2.85	20.95	879.9	10.9	80.7248
S22	7	2018-10-12	2.9	17.84	749.28	13.1	57.1969
S31	7	2018-10-18	NO PEAK			11
S33	7	2018-10-19	2.88	26.34	1106.28	10.3	107.406
S34	7	2018-10-09	2.85	3.12	131.04	10.2	12.8471
S35	7	2018-10-12	NO PEAK			10.7
S36	7	2018-10-19	NO PEAK			10.4
L1	11	2018-10-17	2.84	4.67	196.14	9.5	20.6463	39.457	10
L2	11	2018-10-09	2.85	15.94	669.48	9.9	67.6242
L3	11	2018-10-03	2.79	18.49	776.58	13.2	58.8318
L4	11	2018-10-03	2.8	10.3	432.6	8.9	48.6067
L11	11	2018-10-10	NO PEAK			10.7
L20	11	2018-10-12	NO PEAK			10
L27	11	2018-10-03	2.79	7.3	306.6	11.2	27.375
L28	11	2018-10-03	2.79	8.54	358.68	10	35.868
L29	11	2018-10-09	2.85	3.68	154.56	10.3	15.0058
L30	11	2018-10-16	2.88	4.3	180.6	9.8	18.4286
L35	11	2018-10-12	2.83	9.28	389.76	10.3	37.8408
L59	11	2018-10-03	2.79	14.86	624.12	9.7	64.3423
S1	11	2018-10-03	2.79	7.97	334.74	10.4	32.1865	34.9304	10
S6	11	2018-10-03	2.79	1.79	75.18	10.9	6.89725
S11	11	2018-10-09	2.86	25.36	1065.12	11.4	93.4316
S18	11	2018-10-10	2.84	9.83	412.86	10.1	40.8772
S19	11	2018-10-03	2.8	4.44	186.48	10.1	18.4634
S25	11	2018-10-03	2.79	7.97	334.74	9.9	33.8121
S26	11	2018-10-16	NO PEAK			9.9
S28	11	2018-10-17	2.84	5.47	229.74	10.2	22.5235
S29	11	2018-10-03	2.78	3.86	162.12	9.5	17.0653
S30	11	2018-10-10	NO PEAK			10.1
S32	11	2018-10-12	2.88	9.552	401.184	13.4	29.9391
S47	11	2018-10-09	2.87	12.11	508.62	9.4	54.1085

## Sheet: JH
						JH Titer
Sample	Age (dpov)	Run Date	RT	Peak Area	20HE Eq (pg)	Egg Mass (mg)	20HE Eq (pg/mg)	N
S64	5	2018-12-03	13.3	3128819	9.3	29.5297	22.958	12		S	Short Day (Diapause)
S67	5	2018-12-03	13.3	4269877	12.7	29.5103				L	Long Day (Non-Diapause)
S54	5	2018-12-03	13.28	4123173	9.7	37.3097
S69	5	2018-12-03	13.3	4161913	12	30.442
S42	5	2018-12-03	13.26	3363188	10.2	28.941
S52	5	2018-12-03	13.27	8837945	19.5	39.7813
S27	5	2018-12-03	13.23	1539752	11.1	12.1756
S37	5	2018-12-03	13.22	1818730	11	14.5123
S39	5	2018-12-03	13.21	845941	14.2	5.22894
S43	5	2018-12-03	13.24	1281959	9.7	11.6002
S49	5	2018-12-03	13.23	1941771	10.1	16.8748
S53	5	2018-12-03	13.23	2856818	12.8	19.59
L39	5	2018-12-03	13.3	11057777	15.7	61.8202	37.1942	12
L65	5	2018-12-03	13.29	9685485	14.6	58.2278
L47	5	2018-12-03	13.28	10908623	10	95.7485
L54	5	2018-12-03	13.28	12321063	11	98.3145
L48	5	2018-12-03	13.28	3401191	11.8	25.2994
L62	5	2018-12-03	13.24	3287393	12.6	22.9004
L38	5	2018-12-03	13.24	1815981	11.5	13.8604
L55	5	2018-12-03	13.23	1099017	13	7.42033
L49	5	2018-12-03	13.22	1387237	11.5	10.588
L66	5	2018-12-03	13.24	1342974	9.6	12.2789
L56	5	2018-12-03	13.22	2290227	10	20.1021
L67	5	2018-12-03	13.25	2409995	10.7	19.7694
S45	7	2018-12-03	13.29	5397039	10	47.3715	20.947	11
S58	7	2018-12-03	13.29	21941264	15
S38	7	2018-12-03	13.28	4019575	10.4	33.9241
S50	7	2018-12-03	13.29	4978817	11.5	38.0006
S46	7	2018-12-03	13.24	2123255	10.9	17.0977
S55	7	2018-12-03	13.26	2492667	11.5	19.0252
S40	7	2018-12-03	13.21	1464064	11.5	11.1744
S56	7	2018-12-03	13.18	1675550	10.4	14.1412
S44	7	2018-12-03	13.18	835783	10.1	7.2633
S65	7	2018-12-03	13.2	1580409	10.2	13.5998
S57	7	2018-12-03	13.24	1791744	10.9	14.4282
S66	7	2018-12-03	13.25	2131433	13	14.391
L33	7	2018-12-03	13.31	8699814	9.8	77.9194	29.9732	12
L59	7	2018-12-03	13.29	8871583	9.8	79.4579
L53	7	2018-12-03	13.27	4019256	9.9	35.6346
L58	7	2018-12-03	13.28	2408103	11.4	18.541
L45	7	2018-12-03	13.17	4842719	10.7	39.7253
L69	7	2018-12-03	13.21	1960639	13.2	13.0372
L46	7	2018-12-03	13.16	1825410	9.1	17.6068
L50	7	2018-12-03	13.21	1280338	10.3	10.9106
L52	7	2018-12-03	13.22	1531301	10.7	12.5614
L68	7	2018-12-03	13.19	1810365	11	14.4456
L51	7	2018-12-03	13.19	2531115	10.5	21.1585
L57	7	2018-12-03	13.24	2873071	13.5	18.6799
S40	11	2018-12-03	13.29	4740533	10	41.6092	18.7881	12
S68	11	2018-12-03	13.29	4246677	11	33.8859
S61	11	2018-12-03	13.28	2359203	10.7	19.3528
S62	11	2018-12-03	13.21	2839077	9.9	25.1712
S41	11	2018-12-03	13.19	1601215	10	14.0544
S59	11	2018-12-03	13.26	1439678	11	11.4877
S60	11	2018-12-03	13.24	1800922	11.7	13.5105
S71	11	2018-12-03	13.24	1451022	14.5	8.78351
S51	11	2018-12-03	13.22	1792740	12.5	12.5884
S63	11	2018-12-03	13.21	2032472	12.8	13.9372
S4X	11	2018-12-03	13.17	1977083	10.8	16.068
S70	11	2018-12-03	13.25	2137328	12.5	15.008
L36	11	2018-12-03	13.27	5627676	12.2	40.4885	28.0188	11
L61	11	2018-12-03	13.28	8639119	10.2	74.3415
L41	11	2018-12-03	13.28	2127279	10.1	18.4869
L44	11	2018-12-03	13.26	17539101	12
L37	11	2018-12-03	13.25	2308053	10.6	19.1118
L43	11	2018-12-03	13.27	5667775	10	49.7479
L40	11	2018-12-03	13.28	1988681	9.5	18.374
L64	11	2018-12-03	13.24	2191279	12.6	15.2647
L42	11	2018-12-03	13.23	3249883	9.9	28.8134
L58	11	2018-12-03	13.24	2794712	11.5	21.3305
L60	11	2018-12-03	13.2	1820923	12.1	13.2089
L70	11	2018-12-03	13.22	1791859	17.4	9.03892
